# Supplementary material for: Subcellular Localization Signals of bHLH-PAS Proteins: Their Significance, Current State of Knowledge and Future Perspectives
Source: MDPI journal article supplement (doi:10.3390/ijms20194746), 2019-09-24

# Subcellular Localization Signals of bHLH-PAS Proteins: their Significance, Current State of Knowledge and Future Perspectives

Beata Greb-Markiewicz <sup>1,\*</sup> and Marta Kolonko <sup>1</sup>

## Supplementary Materials Table 3

### Predictors used for NLS prediction:

cNLS Mapper  
NLSTRADAMUS  
NucPred  
PSORTII  
SeqNLS  
ELM

### Predictors used for NES prediction:

ELM  
NES Finder  
NetNES  
LocNES

### MET

```
>tr|Q9VYW2|Q9VYW2_DROME FI10506p OS=Drosophila melanogaster OX=7227 GN=Met  
PE=2 SV=1  
MAAPETGNTGSTGSAGSTGSGSGSGSGSGSSSDPANGREARNLAEKQRRDKLNASIQELA  
TMVPHAAESSRRLDKTAVLRFATHGLRLQYVFGKSASRRRKKTGLKGTGMSASPVGDLPN  
PSLHLTDTLMQLLDCCFLTTLTCGQIVLVSTSVQQLLGHQCSDLYGQNLQITHPDDQDL  
LRQQLIPRDIETLFYQHQQHQQGHNPQQHSTSTASTSGSDLEEEEMETEEHRLGRQQG  
EADDDDEHPYNRRTPSPRRMAHLATIDDRLRMDRRCFTVRLARASTRAEATRHYERVKID  
GCFRRSDSSLTGGAANYPIVSQLIIRSRNNMLAAAAAVAAEAATVPPQHDAIAQAALH  
GISGNDIVLVAMARVLREERPEETEGTVGLTIYRQPEPYQLEYHTRHLIDGSIIDCDQR  
IGLVAGYMKDEVNLSPF CFMHLDDVRWVIVALRQMYDCNSDYGESCYRLLSRNGRFIYL  
HTKGFLEVDRGSNKVHSFLCVNTLLDEEAGRQKVQEMKEKFSTIIKAEMPTQSSSPDLPA  
SQAPQQLERIVLYLIENLQKSVDSAETVGGQGMESLMDDGYSSPANTLTLEELAPSPTPA  
LALVPPAPSSVKSSISKSVSVNVNTAARKFQQEHQKQRERDREQLKERTNSTQGVIQQLS  
SCLSEAETASCILSPASSLSASEAPDTPDPSNTSPPPSLHTRPSVLHRTLTLTSLR
```

### cNLS Mapper Result score 2.0

Predicted NLSs in query sequence

|                                                     |     |
|-----------------------------------------------------|-----|
| MAAPETGNTGSTGSAGSTGSGSGSGSGSSSDPANGREARNLAEKQRRD    | 50  |
| KLNASIQLATMVPHAAESSRRLDKTAVLRFATHGLRLQYVFGKSASRRR   | 100 |
| KKTGLKGTGMSASPVGDLPNPSLHLTD                         | 150 |
| TSVEQLLGHCQSDLYGQNLQITHPDDQDLLRQQLIPRDIETLFYQHQQH   | 200 |
| QQQGHNPQQHSTSTSASTSGSDLEEEEMETE                     | 250 |
| EHRLGRQQGEADDEDHPY                                  | 250 |
| NRRTSPRRMAHLATIDDLRMDRRCFTVRLARASTRAEATRHYERVKID    | 300 |
| GCFRRSDSSLTGAAANYPIVSQ                              | 350 |
| LIRRSRNNMLAAAAVAEEAATVPPQ                           | 350 |
| HDAIAQAALHGISGNDIVLVAMARVLREERPPEETEGTVGLTIYRQPEPY  | 400 |
| QLEYHTRHLIDGSIIDCDQIRIGLVAGYMKDEVNLSFFCFMHLDDV      | 450 |
| RWVI                                                | 450 |
| VALRQMYDCNSDYGESCYRLLSRNGRFIYLHTKGFLEVDRGSNKVHSFLC  | 500 |
| VNTLLDEEAGRQKVQEMKEKFTIIKAEMPTQSSSPDLPASQAPQQLERI   | 550 |
| VLYLIENLQKSVDSAETVGGQGMESLMDDGYSSPANTLTLEELAPSPTPA  | 600 |
| LALVPPAPSSSVKSSISKSVSVNVNTAARKFQQEHQKQRERDREQLKERTN | 650 |
| STQGVIRQLSSCLSEAETASCILSPASSLSASEAPDTPDPSNTSPPPSL   | 700 |
| HTRPSVLHRTLTSTLR                                    | 716 |

### Predicted monopartite NLS

| Pos. | Sequence | Score |
|------|----------|-------|
|      |          |       |

### Predicted bipartite NLS

| Pos. | Sequence                            | Score |
|------|-------------------------------------|-------|
| 38   | REARNLAEKQRRDKLNASIQLATMVPHAAESSRR  | 2.9   |
| 41   | RNLAEKQRRDKLNASIQLATMVPHAAESSRRLDKT | 2.7   |
| 48   | RRDKLNASIQLATMVPHAAESSRRLDKTA       | 2.1   |
| 71   | RRLDKTAVLRFATHGLRLQYVFGKSASRRRKK    | 3.6   |
| 98   | RRRKKKTGLKGTGMSASPVGDLPNPSLHLT      | 3.2   |
| 98   | RRRKKKTGLKGTGMSASPVGDLPNPSLHLTD     | 2.1   |
| 98   | RRRKKKTGLKGTGMSASPVGDLPNPSLHLTD     | 2.5   |
| 98   | RRRKKKTGLKGTGMSASPVGDLPNPSLHLTD     | 3.8   |
| 232  | EHRLGRQQGEADDEDHPYNRRTPSPRRMAHL     | 3.3   |
| 247  | DHPYNRRTPSPRRMAHLATIDDLRMDRRCFT     | 2     |
| 251  | NRRTSPRRMAHLATIDDLRMDRRCFTV         | 2     |
| 252  | RRTPSPRRMAHLATIDDLRMDRRCFTVRLARAS   | 3.9   |
| 252  | RRTPSPRRMAHLATIDDLRMDRRCFTVRLARAST  | 2.2   |
| 296  | RVKIDGCFRRSDSSLTGAAANYPIVSQ         | 3.5   |
| 447  | LIRRSRNNMLAAAAVAEEAATVPPQ           | 2.2   |
| 489  | DRGSNKVHSFLCVNTLLDEEAGRQKVQEMK      | 2     |
| 489  | DRGSNKVHSFLCVNTLLDEEAGRQKVQEMKE     | 3     |
| 516  | EMKEKFTIIKAEMPTQSSSPDLPASQAPQ       | 2     |
| 523  | TIKAEMPTQSSSPDLPASQAPQQLERIVLY      | 2.7   |
| 628  | RKFQQEHQKQRERDREQLKERTNSTQGVI       | 2     |
| 628  | RKFQQEHQKQRERDREQLKERTNSTQGVIRQLSSC | 2.6   |

NLStradamus cutoff 0,1

38 - REARNLAEKQRRDKL - 52

68 - ESSRRLDKTAVLRFATHGLRLQYVFGKSASRRRKKKTGLKGTGMSASPV - 115

252 - RRTPSPRRM - 260

636 - KQRER - 640

## NucPred

The NucPred score for your sequence is 0.82 (see [score help](#) below)

```
1  MAAPETGNTGSTGSAGSTGSGSGSGSGSGSSSDPANGREARNLAEKQRRD 50
51  KLNASIQELATMVPHAAESSRRLDKTAVLRFATHGLRLQYVFGKSASRRR 100
101 KKTGLKGTGMSASPVGDLNPNPSLHLTDITLMQLLDCCFLTITCSGQIVLVS 150
151 TSVEQLLGHCQSDLYGQNLQITHPDDQDLLRQQLIPRD IETLFYQHQQH 200
201 QQQGHNPOQHSTSTASSTGSDLEEEEMETEEHRLGRQQGEADDDHPY 250
251 NRRTPSPRRMAHLATIDDLRMDRRCFTVRLARASTRAEATRHYERVKID 300
301 GCFRRSDSSLTGGAANYPIVSQILRRSRNNNMLAAAAVAAEAATVPPQ 350
351 HDAIAQAALHGISGNDIVLVAMARVLREERPPEETEGTVGLTIYRQPEPY 400
401 QLEYHTRHLIDGSIIDCDQRIGLVAGYMKDEVNLSPF CFMHLDDVRWVI 450
451 VALRQMYDCNSDYGESCYRLLSRNGRFIYLHTKGFLEVDRGSNKVHSFLC 500
501 VNTLLDEEAGRQKVQEMKEKFSTIIKAEMPTQSSSPDLPASQAPQQLERI 550
551 VLYLIENLQKSVDSAETVGGQGMESIMDDGYSSPANTLTLEELAPSPTPA 600
601 LALVPPAPSSVKSSISKSVSVVNVTAARKFQQEHQKQRE RDREQLKERTN 650
651 STQGVIRQLSSCLSEAETASCILSPASSLSASEAPDTPD PHSNTSPPPSL 700
701 HTRPSVLHRTLTLSTLR 716
```

Positively and negatively influencing subsequences are coloured according to the following scale:

(non-nuclear) negative ||||| positive (nuclear)

## PSORTII

[NUCDISC: discrimination of nuclear localization signals](#)

```
pat4: RRRK (5) at 98
pat4: RRKK (5) at 99
pat7: none
bipartite: none
content of basic residues: 10.9%
NLS Score: 0.15
```

## SeqNLS

Final-score cutoff: 0.5

**Prediction result (The predicted NLS(s) are underlined)**

Met: MAAPETGNTGSTGSAGSTGSGSGSGSGSGSSSDPANGREARNLAEKQRRDKLNASIQELA

**Definition of different colors in predictions**

| score range | color                                                                               |
|-------------|-------------------------------------------------------------------------------------|
| 0.1-0.3     |  |
| 0.3-0.5     |  |

|           |                                                                                   |
|-----------|-----------------------------------------------------------------------------------|
| 0.5-0.7   |  |
| 0.7-0.8   |  |
| 0.8-0.86  |  |
| 0.86-0.89 |  |
| >0.89     |  |

The predicted NLS(s) (score cutoff = 0.5)

| Protein ID | Predicted NLS | Start | Stop | The highest score of matches within the prediction |
|------------|---------------|-------|------|----------------------------------------------------|
| Met        | PANGREARNL    | 34    | 43   | 0.548                                              |

## ELM

TRG\_NLS\_MonoExtN\_4 Probability 1.276e-03

RRRKKTG 98-104

RRKKTG 99-104

Monopartite variant of the classical basically charged NLS. N-extended version.

No NES positive result

## NES Finder

Position NES Type

=====

263 LATIDDLRLM 2-3-1

431 EVRNLSPFCE 2-2-1

## LocNES

| Protein Name       | Position | Sequence        | Score |
|--------------------|----------|-----------------|-------|
| >LocNES219057319_0 | 71-85    | AESSRRLDKTAVLRF | 0.096 |
| >LocNES219057319_0 | 78-92    | DKTAVLRFATHGLRL | 0.201 |
| >LocNES219057319_0 | 122-136  | LPNPSLHLTDTLMQL | 0.043 |
| >LocNES219057319_0 | 123-137  | PNPSLHLTDTLMQLL | 0.213 |
| >LocNES219057319_0 | 130-144  | TDTLMQLLDCCFTL  | 0.658 |
| >LocNES219057319_0 | 146-160  | CSGQIVLVSTSVEQL | 0.006 |
| >LocNES219057319_0 | 262-276  | RRMAHLATIDDLRLM | 0.092 |
| >LocNES219057319_0 | 425-439  | IGLVAGYMKDEVRL  | 0.064 |

|                    |         |                   |       |
|--------------------|---------|-------------------|-------|
| >LocNES219057319_0 | 430-444 | GYMKDEVRLNLSPPFCF | 0.013 |
| >LocNES219057319_0 | 433-447 | KDEVRLNLSPPFCFMHL | 0.053 |
| >LocNES219057319_0 | 446-460 | HLDDVRWVIVALRQM   | 0.044 |
| >LocNES219057319_0 | 478-492 | NGRFIYLHTKGFLEV   | 0.022 |
| >LocNES219057319_0 | 514-528 | GRQKVQEMKEKFSTI   | 0.080 |
| >LocNES219057319_0 | 542-556 | LPASQAPQQLERIVL   | 0.178 |
| >LocNES219057319_0 | 611-625 | APSSVKSSISKSVSV   | 0.034 |
| >LocNES219057319_0 | 614-628 | SVKSSISKSVSVNVN   | 0.009 |

## NetNES

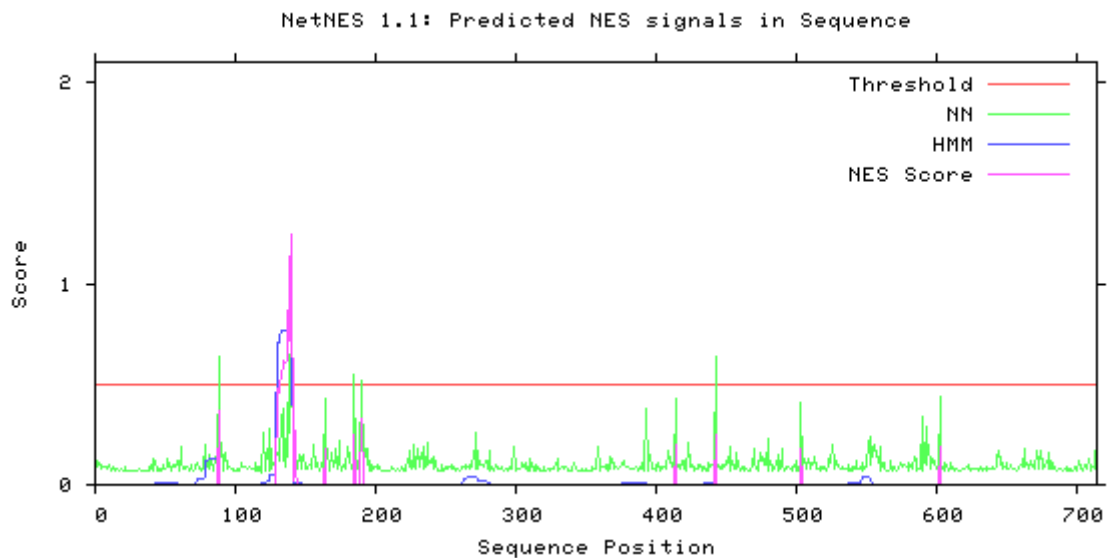

## GCE 959aa isoform

```
>tr|Q9VXW7|Q9VXW7_DROME Germ cell-expressed bHLH-PAS, isoform C
OS=Drosophila melanogaster OX=7227 GN=gce PE=1 SV=2
MEGASRSRNSSTSHSQGRGQDIEDLKQDIPYFDEPPALDADLLVLGKSECQLDELAWDRD
ADGDADAPLETAPAVDLEEDNYPDENESSVLGSDYAPSGSGSGANSFYQSPTPSATGSGC
DLMLRPPSNSMYHFNYRSPGSPMPVAPGVTNSRGLHPYAHSPAAGNPPGFYPMWYPNAP
YGSAGAAGSAGGAVSGGRYMGYPGGVPGGTNSGPGAGPGAMQAAYPGHSAHMHALHHQY
PQPHPHAHHPQPHHSPHPHHPHETMMEMFQLSNSGREARNRAEKNRRDKLNGSIQEL
STMVPHVAESPRRVDKTAVLRFAAHALRLKHAFGNLSMQQRPQITDTLMDMLDSFFLTLT
CHGHILLISASIEQHLGHCQSDLYGQSIMQITHPEDQNMLKQQLIPTELLENLFDAGDSD
AEGEPQRSKAEEDAIDRKLREDRRSFRVRLARAGPRSEPTAYEVVKIDGCFRRSDEAPR
GVRSNHFSSNLQLIRTRGRDDVIPLHTISGNDIILTGCARIIRPPKIASRLIDANTLEY
KTRHLIDGRIIDCDQIRIGIVAGYMTDEVRLNLSPTTFMHNDVVRWVIVALRQMYDCNSSYG
ESTYRLFTRNGNIIYLSKGYLEIDKETNKVHSFVCVNTLLGEEEGKRRVQEMKKKFSVI
INTQIPQSTIDVPASEHPALLEKAVLRRLIQNLQKSGENGGHDDGDEDDDAQDGDDEEDD
DDDQDDGARSMSEFGDPYGSHHGRSHHGSSALSSHGHGNAKTPPLALVPPEASSVKSAIT
KSISVVNVTAAKHLRGIHASTAVKSPSSLGSCSDSHSPCDFCQGAPTDLQAVGSNLK
RGSTAHVETEEKLSKRRFIPSTEIEHVLHTSLDQIGRNLQQLNVARNLREQSQRYELPH
ANQRFDEIMQEHQKQSELYVNIKSEYEVQLQHKASTRKSSDSDRNQEQPPPPLQEDDQD
```

## cNLS Mapper Result 2.0

### Predicted NLSs in query sequence

|                                                      |     |
|------------------------------------------------------|-----|
| MEGASRSRNSSTSHSQGRGQDIEDLKQDIPYFDEPPALDADLLVLGKSEC   | 50  |
| QLDELAWDRDADGDADAPLETAPAVDLEEDNYPDENESSVLGSDYAPSGS   | 100 |
| GSANSFYQSPTPSATGSGCDLMLRPPSNSMYHFNYRSPGSPMPVAPGVT    | 150 |
| NSRGLHPYAHSPAAGNPPGFYPMWYPNAPYGSAGAAGSAGGAVSGGRYM    | 200 |
| GYGPGGVPGGTNSGPGAGPGAMQAAYPGHSAHMHALHHQYPQPHPHAHHP   | 250 |
| QHPHSPHPHHPHETMMEMFQLSNSGREARNRAEKNRRDKLNGSIQEL      | 300 |
| STMVPHVAESPRRVDKTAVLRFAAHALRLKHAFGNSLMQQRPOITDTLMD   | 350 |
| MLDSFFLTTLTCHGHILLISASIEQHLGHCQSDLYGQSIMQITHPEDQNM   | 400 |
| KQQLIPTELENLFDAGDSDAEGEPRQSKAEEDAIDRKLREDDRSFRVR     | 450 |
| LARAGPRSEPTAYEVVKIDGCFRRSDEAPRGVRSNHFSSNLQIRRTGR     | 500 |
| DDVIPLHTISGNDIILTGCARIIRPPKIASRLIDANTLEYKTRHLIDGRI   | 550 |
| IDCDQORIGIVAGYMTDEVNLSPTTFMHNDVVRWVIVALRQMYDCNSSYG   | 600 |
| ESTYRLFTRNGNIIYLQSKGYLEIDKETNKVHSFVCVNTLLGEEEGKRRV   | 650 |
| QEMKKKFSVIINTQIPQSTIDVPASEHPALLEKAVLRRLIQNLQKSGENG   | 700 |
| HDDGDEDDDAQDGDDEEDDDDDQDDGARSMEFGDPYGSHHGRSHHGSS     | 750 |
| ALSSHHGHNAKTPPLALVPPEASSVKSATKISVNVNVTAAKHLRGIHAS    | 800 |
| TAVKSPSSSLGSCCTCSDSHSPCDFCQGAPTTDLQAVGNSLKRGSTAHVETE | 850 |
| EKLSKRRFIPSTEIEHVLHTSLDQIGRNLTQQLNVARNLREQSQRYELPH   | 900 |
| ANQRFDEIMQEHQKQSELYVNIKSEYEVQLQHKASTRKSSSDRNQEQPP    | 950 |
| PPLQEDDQD                                            | 959 |

### Predicted monopartite NLS

| Pos. | Sequence    | Score |
|------|-------------|-------|
| 851  | EKLSKRRFIPS | 2     |

### Predicted bipartite NLS

| Pos. | Sequence                             | Score |
|------|--------------------------------------|-------|
| 150  | TNSRGLHPYAHSPAAGNPPGFYPMWYPNAP       | 2     |
| 279  | REARNRAEKNRRDKLNGSIQELSTMVPHVAESPRR  | 3.3   |
| 282  | RNRAEKNRRDKLNGSIQELSTMVPHVAESPRRVDKT | 2.8   |
| 284  | RAEKNRRDKLNGSIQELSTMVPHVAESPRRVDKTA  | 2.2   |
| 328  | RLKHAFGNSLMQQRPOITDTLMDMLDSFF        | 2     |
| 424  | EPRQSKAEEDAIDRKLREDDRSFRVRLARA       | 3     |
| 469  | DGCFRRSDEAPRGVRSNHFSSNLQIRRTGR       | 3.1   |
| 494  | IRRTGRDDVIPLHTISGNDIILTGCARI         | 2.4   |
| 521  | RIIRPPKIASRLIDANTLEYKTRHLIDGRIIDCD   | 3.2   |
| 623  | EIDKETNKVHSFVCVNTLLGEEEGKRRVQE       | 2.1   |
| 625  | DKETNKVHSFVCVNTLLGEEEGKRRVQEMKK      | 2.7   |
| 648  | RRVQEMKKKFSVIINTQIPQSTIDVPASEHPAL    | 2.2   |
| 801  | TAVKSPSSSLGSCCTCSDSHSPCDFCQGAPTTD    | 2.3   |
| 838  | NLKRGSTAHVETEEKLSKR                  | 2     |
| 838  | NLKRGSTAHVETEEKLSKRRFIP              | 12.5  |
| 838  | NLKRGSTAHVETEEKLSKRRFIPSTEIEH        | 3     |
| 850  | EEKLSKRRFIPSTEIEHVLHTSLDQIGRNLT      | 3.8   |
| 851  | EKLSKRRFIPSTEIEHVLHTSLDQIGRNLTQ      | 3.1   |
| 911  | EHQKQSELYVNIKSEYEVQLQHKASTRKSSD      | 2.5   |

## NLStradamus

278 - GREARNRAEKNRRDKLN - 294

426 - RQRSKAEEDAIDRKLREDRRSFRVRLARAGPRS - 458

647 - KRRVQEMKKK - 656

## NucPred

The NucPred score for your sequence is 0.87 (see [score help](#) below)

|     |                                                     |     |
|-----|-----------------------------------------------------|-----|
| 1   | MEGASRSRNSSTSHSQGRGQDIEDLKQDIPYFDEPPALDADLLVLGKSEC  | 50  |
| 51  | QLDELAWDRDADGDADAPLETAPAVDLEEDNYPDENESSVLGSDYAPSGS  | 100 |
| 101 | GSGANSFYQSPTPSATGSGCDLMLRPPSNSMYHFNYRSPGSPMPVAPGVT  | 150 |
| 151 | NSRGLHPYAHSPAAGNPPGFYPNMWYPNAPYGSAGAAGSAGGAVSGGRYM  | 200 |
| 201 | GYGPGGVPGGTNSGPGAGPGAMQAAYPGHSAHMHALHHQYPQPHPHAHP   | 250 |
| 251 | QHPHHSPPHHPHHPHETMMEMFQLSNSGREARNRAEKNRRDKLNGSIQEL  | 300 |
| 301 | STMVPHVAESPRRVDKTAVLRFAAHALRLKHAFGNSLMQORPQITDTLMD  | 350 |
| 351 | MLDSFFLTTLTCHGHILLISASIEQHLGHCQSDLYGQSIMQITHPEDQNML | 400 |
| 401 | KQQLIPTELENLFDAGHSDAEGEPRQRSKAEEDAIDRKLREDRRSFRVR   | 450 |
| 451 | LARAGPRSEPTAYEVVKIDGCFRRSDEAPRGVRSNHFSSNLQIRRTGR    | 500 |
| 501 | DDVIPLHTISGNDIILTGCARIIRPPKIASRLIDANTLEYKTRHLIDGRI  | 550 |
| 551 | IDCDQIRIGIVAGYMTDEVRLNSPFTFMHNDVVRWVIVALRQMYDCNSSYG | 600 |
| 601 | ESTYRLFTRNGNIIYLQSKGYLEIDKETNKVHSFVCVNTLLGEEEGKRRV  | 650 |
| 651 | QEMKKKFSVIINTQIPQSTIDVPASEHPALLEKAVLRLIQNLQKSGENG   | 700 |
| 701 | HDDGDEDDDAQDGDDEEDDDDDQDDGARMSEFGDPYGSHHGRSHHGSS    | 750 |
| 751 | ALSSHHGHNAKTPPLALVPPEASSVKSATKSISSVNVNTAAKHLRGIHAS  | 800 |
| 801 | TAVKSPSSLGSCSCSDSHSPCDFCQGAPTTDLQAVGSNLKRGSTAHVETE  | 850 |
| 851 | EKLSKRRFIPSTEIEHVLHTSLDQIGRNLQQLNVARNLREQSQRYELPH   | 900 |
| 901 | ANQRFDEIMQEHQKQSELYVNIKSEYEVQLQHKASTRKSSSDSDRNQEPP  | 950 |
| 951 | PPLQEDDQD                                           | 959 |

Positively and negatively influencing subsequences are coloured according to the following scale:

(non-nuclear) negative ||||| positive (nuclear)

## PSORT II

[NUCDISC: discrimination of nuclear localization signals](#)

pat4: none  
pat7: none  
bipartite: KRGSTAHVETEEKLSKR at 840  
content of basic residues: 10.0%  
NLS Score: 0.02

## SeqNLS

Prediction result (The predicted NLS(s) are underlined)

: MEGASRSRNSTSHSQGRGQDIEDLKQDIPYFDEPPALDADLLVLGKSECQLDELAWDRD

## Definition of different colors in predictions

| score range | color                                                                             |
|-------------|-----------------------------------------------------------------------------------|
| 0.1-0.3     |  |
| 0.3-0.5     |  |
| 0.5-0.7     |  |
| 0.7-0.8     |  |
| 0.8-0.86    |  |
| 0.86-0.89   |  |
| >0.89       |  |

The predicted NLS(s) (score cutoff = 0.3)

| Protein ID | Predicted NLS      | Start | Stop | The highest score of matches within the prediction |
|------------|--------------------|-------|------|----------------------------------------------------|
|            | DADLLVLGKSECQLDELA | 39    | 56   | 0.399                                              |
|            | TSHSQGRGQDIEDL     | 12    | 25   | 0.346                                              |

## ELM

**TRG\_NLS\_Bipartite\_1** KRGSTAHVETEEKLSKRRFI 840-859 Probability 2.588e-04

Bipartite variant of the classical basically charged NLS.

**TRG\_NLS\_MonoExtC\_3** GKRRVQE 646-652 Probability 7.252e-04

Monopartite variant of the classical basically charged NLS. C-extended version.

**TRG\_NLS\_MonoExtN\_4** KLSKRRFI 852-859 Probability 1.276e-03

Monopartite variant of the classical basically charged NLS. N-extended version.

No NES positive result

## NES Finder

=====

567 EVRNLSPFTF 2-2-1  
650 VQEMKKKFSV 2-3-1

## LocNES

| Protein Name        | Position     | Sequence               | Score        |
|---------------------|--------------|------------------------|--------------|
| >LocNES1666756443_0 | 22-36        | RGQDIEDLKQDIPYF        | 0.073        |
| >LocNES1666756443_0 | <b>35-49</b> | <b>YFDEPPALDADLLVL</b> | <b>0.130</b> |
| >LocNES1666756443_0 | 67-81        | GDADAPLETAPAVDL        | 0.025        |
| >LocNES1666756443_0 | 264-278      | HHPHPHETMMEMFQL        | 0.084        |
| >LocNES1666756443_0 | 297-311      | LNGSIQELSTMVPHV        | 0.006        |



|                     |         |                 |       |
|---------------------|---------|-----------------|-------|
| >LocNES1666756443_0 | 312-326 | AESPRRVDKTAVLRF | 0.306 |
| >LocNES1666756443_0 | 319-333 | DKTAVLRFAAHALRL | 0.509 |
| >LocNES1666756443_0 | 345-359 | RPQITDTLMDMLDSF | 0.389 |
| >LocNES1666756443_0 | 347-361 | QITDTLMDMLDSFFL | 0.533 |
| >LocNES1666756443_0 | 349-363 | TDTLMDMLDSFFLTL | 0.495 |
| >LocNES1666756443_0 | 561-575 | IGIVAGYMTDEVRLN | 0.038 |
| >LocNES1666756443_0 | 566-580 | GYMTDEVRLNLSPTF | 0.041 |
| >LocNES1666756443_0 | 582-596 | HNDDVRWVIVALRQM | 0.044 |
| >LocNES1666756443_0 | 627-641 | EIDKETNKVHSFVCV | 0.016 |
| >LocNES1666756443_0 | 649-663 | EGKRRVQEMKKKFSV | 0.043 |
| >LocNES1666756443_0 | 650-664 | GKRRVQEMKKKFSVI | 0.026 |
| >LocNES1666756443_0 | 775-789 | EASSVKSAITKSISV | 0.011 |
| >LocNES1666756443_0 | 778-792 | SVKSAITKSISVVNV | 0.016 |
| >LocNES1666756443_0 | 875-889 | SLDQIGRNLTQQLNV | 0.038 |
| >LocNES1666756443_0 | 898-912 | QRYELPHANQRFDEI | 0.015 |

## NetNES 1.1 Server - prediction results

>Sequence - NetNES 1.1 prediction

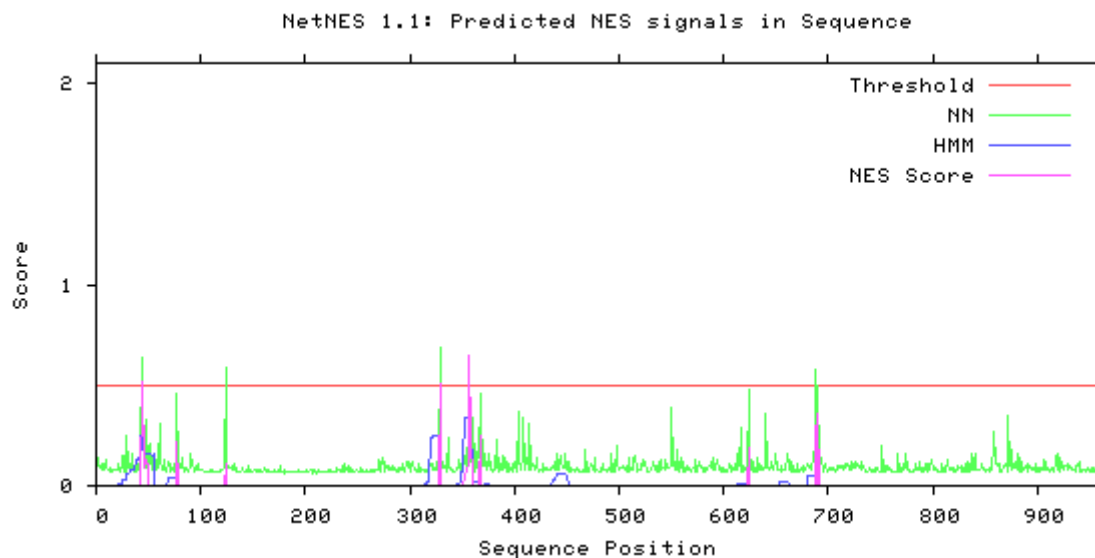

## SIMA

>sp|Q24167|SIMA\_DROME Protein similar OS=Drosophila melanogaster OX=7227  
 GN=sima PE=1 SV=2  
 MVSLIDTIEAAAEKQKQSQAVVTNTSASSSSCSSSFSSSPSSSVGSPSPGAPKTNLTAS

GKPKEKRRNNEKRKEKSRDAARCRRSKETEIFMELSAALPLKTDDVNQLDKASVMRITIA  
 FLKIREMLQFVPSLRDCNDDIKQDIETAEDQQEVKPKLEVGTEDWLNGAEARELLKQTM  
 GFLVLVSHEGDITYVSENVVEYLGITKIDTLGQQIWEYSHQCDHAEIKEALSLKRELAQK  
 VKDEPQQNSGVSTHHRDLFVRLKCTLTSTRGRSINIKSASYKVIHITGHLVVNAKGERLLM  
 AIGRPIPHPSNIEIPLGTSTFLTKHSLDMRFTYVDDKMHDLGYSKPKDLLDTSLSFCQHG  
 ADSERLMATFKSVLSKGQGETSRYRFLGKYGGYCWILSQATIVYDKLKPQSVVVCVNYVIS  
 NLENKHEIYSLAQQTAASEQKEQHQAETEKEPEKAADPEIIAQETKETVNTPIHTSEL  
 QAKPLQLESEKAECTIEETKTATIPVPTATSTADQIKQLPESNPYKQILQAELLIKREN  
 HSPGPRTITATQLLSGSSSGLRPEEKRPKSVTASVLRPSPAPPLTPPPTAVLCKKTPLGVE  
 PNLPTTTTATAAIISSSNQQLQIAQQTQLQNPQQPAQDMSKGFCSLFADDGRGLTMLKEE  
 PDDLSHHLASTNCIQLDEMTFSDMLVGLMGTCLLPEDINSLDSTTCTTASGQHYQSPS  
 SSSTSAPSNTSSSNNSYANSPLSPLTPNSTATASNPSHQQQQQHHNQQQQQQQQQHHHPQ  
 HHDNSNSSSNIDPLFNYREESNDTSCSQHLHSPSITSKSPEDSSLSLCSPLSLTQEDDF  
 SFEAFAMRAPYIPIDDDMPLLTETDLMWCPPEDLQTMVPKEIDAIQQQLQQLQQQHHQQY  
 AGNTGYQQQQQQPQLQQQHFSNSLCSSPASTVSSLSPSPVQQHHQQQAAVFTSDSSELA  
 ALLCGSGNGTSLILAGSGVTVAEECNERLQQHQQQQQQTSGNEFRFTQQLQQELQLQEEQ  
 QQRQQQQQQQQQQQQQQQLLSLNIIECKKEKYDVQMGGSCHPMEDAFENDYSKDSANLDC  
 WDLIQMQVVDTEPVSPNAASPTPCKVSAIQLLQQQQQLQQQQQQQQNIILNAVPLITIQN  
 NKELMQQQQQQQQQQQQQEQQLQPPAIKLLNGASIAPVNTKATIRLVESKPPTTTQSRMAKV  
 NLVPQQQQHGNKRHLNSATGAGNPVESKRLKSGTLCLDVQSPQLLQQLIGKDPAQQQQTQA  
 AKRAGSERWQLSAESKQKQKQQQQSNSVLKNNLLVSGRDDDDSEAMIIDEDNSLVQPIPLG  
 KYGLPLHCHTSTSSVLRDYHNNPLISGTNFQLSPVFGGSDSSGGDGETGSVSVSLDDSVPP  
 GLTACDTDASSDSGIDENSLMDGASGSPRKLSSTSNSTNQAESAPPALDVETPVTQKSV  
 EEEFEGGSGSNAPSRKTSISFLDSSNPLLHTPAMMDLVNDDYIMGEGGFESDNQLEQV  
 LGWPEIA

## cNLS Mapper Result 2.0

### Predicted NLSs in query sequence

|                                                     |      |
|-----------------------------------------------------|------|
| MVSLIDTIEAAAEKQKQSQAVVTNTSASSSSSCSSSFSSSPSSSVGSPSP  | 50   |
| GAPKTNLTASGKPKEKRRNNEKRKEKSRDAARCRRSKETEIFMELSAALP  | 100  |
| LKTDDVNQLDKASVMRITIAFLKIREMLQFVPSLRDCNDDIKQDIETAED  | 150  |
| QQEVKPKLEVGTEDWLNGAEARELLKQTMDFLLVLVSHEGDITYVSENVV  | 200  |
| EYLGITKIDTLGQQIWEYSHQCDHAEIKEALSLKRELAQKVDEPQQNSG   | 250  |
| VSTHHRDLFVRLKCTLTSTRGRSINIKSASYKVIHITGHLVVNAKGERLLM | 300  |
| AIGRPIPHPSNIEIPLGTSTFLTKHSLDMRFTYVDDKMHDLGYSKPKDLL  | 350  |
| DTSLSFCQHGDSERLMATFKSVLSKGQGETSRYRFLGKYGGYCWILSQAT  | 400  |
| IVYDKLKPQSVVVCVNYVISNLENKHEIYSLAQQTAASEQKEQHQAET    | 450  |
| EKEPEKAADPEIIAQETKETVNTPIHTSELQAKPLQLESEKAECTIEETK  | 500  |
| TIATIPVPTATSTADQIKQLPESNPYKQILQAELLIKRENHSPGPRTITA  | 550  |
| QLLSGSSSGLRPEEKRPKSVTASVLRPSPAPPLTPPPTAVLCKKTPLGVE  | 600  |
| PNLPPTTTTATAAIISSSNQQLQIAQQTQLQNPQQPAQDMSKGFCSLFADD | 650  |
| GRGLTMLKEEPDDLSHHLASTNCIQLDEMTFSDMLVGLMGTCLLPEDIN   | 700  |
| SLDSTTCTTASGQHYQSPSSSSTSAPSNTSSSNNSYANSPLSPLTPNST   | 750  |
| ATASNPSHQQQQQHHNQQQQQQQQQHHHPQHHDNSNSSSNIDPLFNYREE  | 800  |
| SNDTSCSQHLHSPSITSKSPEDSSLSLCSPLSLTQEDDFSFEAFAMRAP   | 850  |
| YIPIDDDMPLLTETDLMWCPPEDLQTMVPKEIDAIQQQLQQLQQQHHQQY  | 900  |
| AGNTGYQQQQQQPQLQQQHFSNSLCSSPASTVSSLSPSPVQQHHQQQQA   | 950  |
| VFTSDSSELAALLCGSGNGTSLILAGSGVTVAEECNERLQQHQQQQQQTS  | 1000 |
| GNEFRFTQQLQQELQLQEEQQQRQQQQQQQQQQQQQLLSLNIIECKKEK   | 1050 |
| YDVQMGGSCHPMEDAFENDYSKDSANLDCWDLIQMQVVDTEPVSPNAAS   | 1100 |
| PTPCKVSAIQLLQQQQQLQQQQQQQQNIILNAVPLITIQNNKELMQQQQQ  | 1150 |
| QQQQQQQEQQLQPPAIKLLNGASIAPVNTKATIRLVESKPPTTTQSRMAKV | 1200 |

NLVPQQQHHGNKRHLNSATGAGNPVESKRLKSGTLCCLDVQSPQLLQQLIG 1250  
 KDPAQQQTQAAKRAGSERWQLSAESKQQKQQQQQSSNSVLKNLLVSGRDDD 1300  
 DSEAMIIDEDNSLVQPIPLGKYGLPLHCHTSTSSVLRDYHNNPLISGTNF 1350  
 QLSVPVFGSDSSGGDGETGSVVSLLDSSVPPGLTACDTDASSDSGIDENSL 1400  
 MDGASGS PRKRLSSTSNSTNQAESAPPALDVETPVTQKSVEEEFEGGSG 1450  
 SNA PSRKTSISFLDSSNPLLHTPAMMDLVNDDYIMGEGGFESDNQLEQV 1500  
 LGWPEIA 1507

### Predicted monopartite NLS

| Pos. | Sequence   | Score |
|------|------------|-------|
| 63   | PKEKRRNNEK | 5     |
| 1409 | RKRLSSTSN  | 3     |

### Predicted bipartite NLS

| Pos. | Sequence                             | Score |
|------|--------------------------------------|-------|
| 51   | GAPKTNLTASGKPKEKRRNNEKRKEKSRDA       | 2.1   |
| 61   | GKPKEKRRNNEKRKEKSRDAARCRRSKET        | 2.6   |
| 62   | KPKEKRRNNEKRKEKSRDAARCRRSKETEI       | 2.9   |
| 67   | RRNNEKRKEKSRDAARCRRSKETEIFMELSAA     | 2.6   |
| 67   | RRNNEKRKEKSRDAARCRRSKETEIFMELSAALP   | 2.1   |
| 132  | PSLRDCNDIDIKQDIETAEDQQEVKPKLEVGT     | 2.6   |
| 150  | DQQEVKPKLEVGTEDWLNGAEARELLKQTMDS     | 2.9   |
| 229  | EALSLKRELAQKVKDEPQQNSGVSTHHRDLFV     | 2.7   |
| 235  | RELAQKVKDEPQQNSGVSTHHRDLFVRLKCTLT    | 2.7   |
| 281  | KVIHITGHLVVNAKGERLLMAIGRPI           | 2.2   |
| 321  | FLTKHSLDMRFTYVDDKMHDLLGYSPKDLLD      | 2.4   |
| 347  | KDLLDTSLSFSCQHGADESRLMATFKSV         | 3.1   |
| 383  | RYREFLGKYGGYCWILSQATIVYDKLKPQSVVCV   | 3     |
| 439  | EQKEQHQAETEKEPEKAADPEIIAQETK         | 2     |
| 522  | ESNPYKQILQAELLIKRENHSPGPRTITAQLLS    | 2.9   |
| 538  | RENHSPGPRTITAQLLSGSSSGLRPEEKRPKSVTAS | 3.2   |
| 561  | RPEEKRPKSVTASVLRPSAPPLTPPPPTAVL      | 3.3   |
| 561  | RPEEKRPKSVTASVLRPSAPPLTPPPPTAVLCKKT  | 2.3   |
| 1044 | IECKKEKYDVQMGGSLCHPMEDAFENDYSKDS     | 2.3   |
| 1102 | TPCKVSAIQLLQQQQQLQQQQQQQQNIILN       | 2.8   |
| 1138 | IQNNKELMQQQQQQQQQQQQEQLOQPAIKLL      | 2.3   |
| 1163 | PAIKLLNGASIAPVNTKATIRLVESKPPTTT      | 2.1   |
| 1183 | RLVESKPPTTTQSRMAKVNLPQQQHHGNKRH      | 2     |
| 1212 | KRHLNSATGAGNPVESKRLKS                | 6.4   |
| 1212 | KRHLNSATGAGNPVESKRLKSGTL             | 4.1   |
| 1212 | KRHLNSATGAGNPVESKRLKSGTLCCLD         | 3.8   |
| 1226 | ESKRLKSGTLCCLDVQSPQLLQQLIGKDPA       | 2.4   |
| 1226 | ESKRLKSGTLCCLDVQSPQLLQQLIGKDPA       | 2.1   |
| 1262 | KRAGSERWQLSAESKQQKQQQ                | 2.2   |
| 1262 | KRAGSERWQLSAESKQQKQQQQQSSNSV         | 2.9   |
| 1263 | RAGSERWQLSAESKQQKQQQQQSSNSVLKNLLVS   | 2.7   |
| 1288 | VLKNLLVSGRDDDDSEAMIIDEDNSLVQPI       | 3.3   |
| 1317 | IPLGKYGLPLHCHTSTSSVLRDYHNNPLISGT     | 3.2   |
| 1408 | PRKRLSSTSNSTNQAESAPPALDVETPVT        | 2.9   |
| 1454 | PSRKTSISFLDSSNPLLHTPAMMDLVNDDYI      | 2.3   |

## NLStradamus cutoff 0,1

|                 |                                                                |
|-----------------|----------------------------------------------------------------|
| Posterior @ 0.1 | 46 -<br>GSPSPGAPKTNLTASGKPKEKRRNNEKRKEKSRDAARCRRSKETEI<br>- 91 |
|                 | 545 - PR - 546                                                 |
|                 | 554 - SGSSSGLRPEEKRPKSVTASVLRPSPAP - 581                       |
|                 |                                                                |

## NucPred

The NucPred score for your sequence is 0.94 (see [score help](#) below)

|      |                                                     |      |
|------|-----------------------------------------------------|------|
| 1    | MVSLIDTIEAAAEKQKQSQAVVTNTSASSSSCSSSFSSSPSSSVGSPSP   | 50   |
| 51   | GAPKTNLTASGKPKEKRRNNEKRKEKSRDAARCRRSKETEIFMELSAALP  | 100  |
| 101  | LKTDDVNQLDKASVMRITIAFLKIREMLQFVPSLRDCNDDIKQDIETAED  | 150  |
| 151  | QQEVKPKLEVGTEDWLNQAEARELLKQTMDFLLVLSHEGDITYVSENVV   | 200  |
| 201  | EYLGITKIDTLGQQIWEYSHQCDHAEIKEALSLKRELAQVKVDEPQQNSG  | 250  |
| 251  | VSTHHRDLFVRLKCTLTSRGRSINIKSASYKVIHITGHLVVNAKGERLLM  | 300  |
| 301  | AIGRPIPHPSNIEIPLGTSTFLTKHSLDMRFTYVDDKMHDLLGYSPKDLL  | 350  |
| 351  | DTSLFSCQHGADSERLMATFKSVLSKGQGETSRYRFLGKYGGYCWILSQA  | 400  |
| 401  | TIVYDKLKPQSVVCVNYVISNLENKHEIYSLAQQTAASEQKEQHHQAAET  | 450  |
| 451  | EKEPEKAADPEIIAQETKETVNTPIHTSELQAKPLQLESEKAETIETK    | 500  |
| 501  | TIATIPPVTATSTADQIKQLPESNPYKQILQAELLIKRENHSPGPRITTA  | 550  |
| 551  | QLLSGSSSGLRPEEKRPKSVTASVLRPSPAPPLTPPPTAVLCKKTPLGVE  | 600  |
| 601  | PNLPPTTTATAAIISSNQQLQIAQQTQLQNPQQAQDMSKGFCSLFADD    | 650  |
| 651  | GRGLTMLKEEPDDLSHHLASTNCIQLDEMTFFSDMLVGLMGTCLLPEDIN  | 700  |
| 701  | SLDSTTCSTTASGQHYQSPSSSSTSAPSNNTSSNNNSYANSPLSPLTPNST | 750  |
| 751  | ATASNPSHQQQQHNNQQQQQQQQQHHPQHHDNSNSSSNIDPLFNYREE    | 800  |
| 801  | SNDTSCSQHLHSPSITSKSPEDSSLPSLCSPNSLTQEDDFSFEAFAMRAP  | 850  |
| 851  | YIPIDDDMPLLTETDLMWCPPEDLQTMVPKEIDAIQQQLQQLQQQHHQOY  | 900  |
| 901  | AGNTGYQQQQQPQLQQQHFSNSLCSSPASTVSSLSPSPVQQHHQQQQA    | 950  |
| 951  | VFTSDSSELAALLCGSGNGTSLILAGSGVTVAEECNERLQQHQQQQQTS   | 1000 |
| 1001 | GNEFRFTFQQLQQLQEEQQQRQQQQQQQQQQQQQLLSLNIECKKEK      | 1050 |
| 1051 | YDVQMGSSLCHPMEDAFENDYSKDSANLDCWDLIQMQVVDTEPVSPNAAS  | 1100 |
| 1101 | PTPCKVSAIQLLQQQQQLQQQQQQQQNIILNAVPLITIQNNKELMQQQQQ  | 1150 |
| 1151 | QQQQQQQEQLQQPAIKLLNGASIPVNTKATIRLVESKPPTTTQSRMAKV   | 1200 |
| 1201 | NLVPQQQQHGNKRHLNSATGAGNPVESKRLKSGTLCLDVQSPQLLQQLIG  | 1250 |
| 1251 | KDPAQQQTQAAKRAGSERWQLSAESKQKQQQQQSSSVLKNLLVSGRDDD   | 1300 |
| 1301 | DSEAMIIDEDNSLVQPIPLGKYGLPLHCHTSTSSVLRDYHNNPLISGTNF  | 1350 |
| 1351 | QLSPVFGGSDSSGGDGETGSVSVSLDDSVPPGLTACDTDASSDSGIDENSL | 1400 |
| 1401 | MDGASGSPRKRLSSTSNSTNQAESAPPALDVETPVTQKSVEEEFEGGGSG  | 1450 |
| 1451 | SNAPSRKTSISFLDSSNPLLHTPAMMDLVNDDYIMGEGGFESDNQLEQV   | 1500 |
| 1501 | LGWPEIA                                             | 1507 |

Positively and negatively influencing subsequences are coloured according to the following scale:

(non-nuclear) negative ||||| positive (nuclear)

## PSORT II

#### NUCDISC: discrimination of nuclear localization signals

pat4: KRPK (4) at 565  
pat4: PRKR (4) at 1408  
pat7: PKEKRRN- (5) at 63  
pat7: PEEKRPK (3) at 562  
pat7: PRKRLSS (5) at 1408  
bipartite: KRKEKSRDAARCRRSKE at 72  
content of basic residues: 8.0%  
NLS Score: 1.64

## Seq NLS

**Prediction result (The predicted NLS(s) are underlined)**

: MVSLIDTIEAAAEKQKQSQAVVTNTSASSSSCSSSFSSSPSSSVGSPSPGAPKTNLTAS

**Definition of different colors in predictions**

| score range | color                                                                               |
|-------------|-------------------------------------------------------------------------------------|
| 0.1-0.3     |    |
| 0.3-0.5     |    |
| 0.5-0.7     |    |
| 0.7-0.8     |   |
| 0.8-0.86    |  |
| 0.86-0.89   |  |
| >0.89       |  |

**The predicted NLS(s) (score cutoff = 0.3)**

| Protein ID | Predicted NLS                 | Start | Stop | The highest score of matches within the prediction |
|------------|-------------------------------|-------|------|----------------------------------------------------|
|            | LIDTIEAAAEKQKQSQAVVTNTSASSSSC | 4     | 32   | 0.902                                              |
|            | SPSPGAPKTNLTA                 | 47    | 59   | 0.605                                              |

## ELM

**TRG\_NLS\_Bipartite\_1** KRHLNSATGAGNPVESKRLKS 1212-1232 2.588e-04

Bipartite variant of the classical basically charged NLS.

**TRG\_NLS\_MonoExtN\_4** PRKRLS 1408-1413 1.276e-03

Monopartite variant of the classical basically charged NLS. N-extended version.

TRG\_NES\_CRM1\_1 90-105; 173-189 7.626e-04

Some proteins re-exported from the nucleus contain a Leucine-rich nuclear export signal (NES) binding to the CRM1 exportin protein.

## NES Finder

Position NES Type

=====

92 FMELSAALPL 2-3-1  
115 MRITIAFLKI 3-2-1  
121 FLKIREMLQF 2-3-1  
1007 FQQLQQELQL 2-3-1  
1129 ILNAVPLITI 3-2-1

## LocNES

| Protein Name        | Position | Sequence        | Score |
|---------------------|----------|-----------------|-------|
| >LocNES1701850396_0 | 91-105   | KETEIFMELSAALPL | 0.254 |
| >LocNES1701850396_0 | 107-121  | TDDVNQLDKASVMRI | 0.142 |
| >LocNES1701850396_0 | 109-123  | DVNQLDKASVMRITI | 0.105 |
| >LocNES1701850396_0 | 111-125  | NQLDKASVMRITIAF | 0.149 |
| >LocNES1701850396_0 | 112-126  | QLDKASVMRITIAFL | 0.163 |
| >LocNES1701850396_0 | 114-128  | DKASVMRITIAFLKI | 0.318 |
| >LocNES1701850396_0 | 117-131  | SVMRITIAFLKIREM | 0.031 |
| >LocNES1701850396_0 | 120-134  | RITIAFLKIREMLQF | 0.139 |
| >LocNES1701850396_0 | 121-135  | ITIAFLKIREMLQFV | 0.062 |
| >LocNES1701850396_0 | 124-138  | AFLKIREMLQFVPSL | 0.036 |
| >LocNES1701850396_0 | 174-188  | EARELLKQTMDFLL  | 0.098 |
| >LocNES1701850396_0 | 175-189  | ARELLKQTMDFLLV  | 0.398 |
| >LocNES1701850396_0 | 195-209  | DITYVSENVVEYLG  | 0.028 |
| >LocNES1701850396_0 | 275-289  | RSINIKSASYKVIHI | 0.003 |
| >LocNES1701850396_0 | 281-295  | SASYKVIHITGHLVV | 0.010 |
| >LocNES1701850396_0 | 331-345  | LDMRFTYVDDKMHD  | 0.058 |
| >LocNES1701850396_0 | 412-426  | KPQSVVCVNYVISNL | 0.040 |
| >LocNES1701850396_0 | 477-491  | TPIHTSELQAKPLQL | 0.437 |
| >LocNES1701850396_0 | 636-650  | PQPPAQDMSKGFCSL | 0.226 |

|                     |           |                 |       |
|---------------------|-----------|-----------------|-------|
| >LocNES1701850396_0 | 666-680   | DDLSHHLASTNCIQL | 0.032 |
| >LocNES1701850396_0 | 677-691   | CIQLDEMTPFSDMLV | 0.086 |
| >LocNES1701850396_0 | 679-693   | QLDEMTPFSDMLVGL | 0.125 |
| >LocNES1701850396_0 | 692-706   | GLMGTCLLPEDINSL | 0.127 |
| >LocNES1701850396_0 | 837-851   | SLTQEDDFSFEAFAM | 0.036 |
| >LocNES1701850396_0 | 844-858   | FSFEAFAMRAPYIPI | 0.015 |
| >LocNES1701850396_0 | 882-896   | VPKEIDAIQQQLQQL | 0.030 |
| >LocNES1701850396_0 | 971-985   | GNGTLSILAGSGVTV | 0.105 |
| >LocNES1701850396_0 | 1006-1020 | NEFRTFQQLQQL    | 0.235 |
| >LocNES1701850396_0 | 1101-1115 | NAASPTPCKVSAIQL | 0.019 |
| >LocNES1701850396_0 | 1125-1139 | QQQQQQNIILNAVPL | 0.130 |
| >LocNES1701850396_0 | 1128-1142 | QQQNIILNAVPLITI | 0.089 |
| >LocNES1701850396_0 | 1192-1206 | KPPTTTQSRMAKVNL | 0.113 |
| >LocNES1701850396_0 | 1229-1243 | VESKRLKSGTLCLDV | 0.066 |
| >LocNES1701850396_0 | 1345-1359 | NNPLISGTNFQLSPV | 0.007 |
| >LocNES1701850396_0 | 1468-1482 | DSSNPLLHTPAMMDL | 0.037 |
| >LocNES1701850396_0 | 1469-1483 | SSNPLLHTPAMMDLV | 0.020 |

## NetNES 1.1 Server - prediction results

>Sequence - NetNES 1.1 prediction

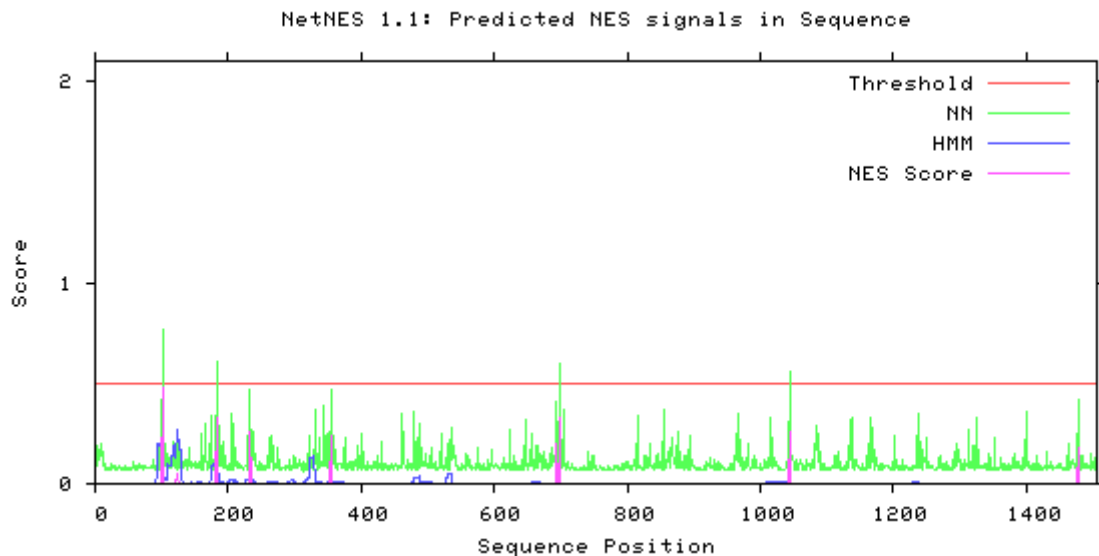

## TANGO

>sp|O15945|ARNT\_DROME Aryl hydrocarbon receptor nuclear translocator  
homolog OS=Drosophila melanogaster OX=7227 GN=tgo PE=1 SV=3  
MDEANIQDKERFASRENHCEIERRRNKMTAYITELSDMVPTCSALARKPDKLTILRMAV  
AHMKALRGTTGNTSSDGYKPSFLTDQELKHLILEAADGFLFVVS CD SG RV IYVSDSVTPV  
LNYTQSDWYGTSLYEHIHPDDREKIREQLSTQESQNAGRILDLSGTVKKEGHQSSMRLS  
MGARRGFICMRVGNVNPESMVSGHLNRLKQRNSLGPSRDGTNYAVVHCTGYIKNWPPTD  
MFPNMHMERDVEDMSSHCCLVAIGRLQVTSTAANDMSGSNQSEFITRHAMDGKFTFVDQ  
RVLNIGYTPTELLGKICYDFFHPEDQSHMKESFDQVLKQKGQMFSLLYRARAKNSEYVW

LRTQAYAFNLNPTDEVEYIVCTNSSGKTMHGAPLDAAAAHTPEQVQQQQQQEQHVYVQAA  
 PGVDYARRELTPVGSATNDGMYQTHMLAMQAPTPQQQQQQQRPQSAQTTPVGYTYDTH  
 SPYSAGGPSPLAKIPKSGTSPTPVAPNSWAALRPQQQQQQQPVTEGYQYQQTSPARSPS  
 GPTYTQLSAGNGNRQQAQPGAYQAGPPPPNAPGMWDWQQAGGHPHPPHPTAHPHHPAH  
 PGGPAGAGQPQGGQEFSDMLQMLDHTPTTFEDLNINMFSTPFE

## cNLS Mapper Result 2.0

### Predicted NLSs in query sequence

|                                                                             |     |
|-----------------------------------------------------------------------------|-----|
| MDEANIQDKERFAS <b>RENHCEIERRRRNKMTAYITELSDMVPTCSALARKP</b>                  | 50  |
| <b>DKLTI</b> LRMAVAHMKALRGNTSS <b>DGTYPKPSFLTDQELKHLILEAADGFL</b>           | 100 |
| <b>FVVS</b> CD <b>SGRVIYVSD</b> SVTPVLNYTQSDWYGTSLEYEHIPDDREKIREQLS         | 150 |
| TQESQNAGRILDLSG <b>TVKKEGHQSSMRLSMGARRGFICRMVGNVN</b> PES                   | 200 |
| MVSGHL <b>NRLKQRNSLGPSRDGTNYAVVHCTGYIKNWPPTDMFPMHMERD</b>                   | 250 |
| <b>VDDMSSHCC</b> LVAIGRLQVTSTAANDMSGNNQSEFIT <b>RHAMDGKFTFVDQ</b>           | 300 |
| <b>RVLN</b> ILGYTP <b>TELLGKICYDFFHPEDQSHMKESFDQVLKQKGQMFSLLYR</b>          | 350 |
| <b>ARAKN</b> SEYVWLRT <b>QAY</b> AFNLNPTDEVEYIVCTNSS <b>GKTMHGAPLDAAAAH</b> | 400 |
| <b>TPEQVQQQQQQEQ</b> HVYVQAAPGVDYARRELTPVGSATNDGMYQTHMLAMQ                  | 450 |
| APT <b>PQQQQQQQQQ</b> RPQSAQTTPVGYTYDTHSPYSAGGPS <b>PLAKIPKSGTS</b>         | 500 |
| <b>PTPVAPNSWAALRPQQQQQQQQP</b> VTEGYQYQQTSPARSPSGPTYTQLSAG                  | 550 |
| NGNRQQAQPGAYQAGPPPPNAPGMWDWQQAGGHPHPPHPTAHPHHPAH                            | 600 |
| PGGPAGAGQPQGGQEFSDMLQMLDHTPTTFEDLNINMFSTPFE                                 | 642 |

### Predicted monopartite NLS

| Pos. | Sequence | Score |
|------|----------|-------|
|      |          |       |

### Predicted bipartite NLS

| Pos. | Sequence                                          | Score      |
|------|---------------------------------------------------|------------|
| 15   | RENHCEIERRRRNKMTAYITELSDMVPTCSALARKP              | 2.8        |
| 20   | EIERRRRNKMTAYITELSDMVPTCSALARKPD                  | 2.6        |
| 20   | EIERRRRNKMTAYITELSDMVPTCSALARKPDK                 | 2.6        |
| 22   | ERRRRNKMTAYITELSDMVPTCSALARKPD                    | 3.3        |
| 23   | <b>RRRRNKMTAYITELSDMVPTCSALARKPDKLT</b>           | <b>4.6</b> |
| 23   | RRRRNKMTAYITELSDMVPTCSALARKPDKLT <b>I</b>         | 3          |
| 75   | DGTYPKPSFLTDQELKHLILEAADGFLFVVSCD                 | 2.2        |
| 85   | DQELKHLILEAADGFLFVVSCDSGRVIYVSDS                  | 2          |
| 167  | <b>TVKKEGHQSSMRLSMGARRGFICRMVGNV</b>              | <b>2.2</b> |
| 207  | <b>NRLKQRNSLGPSRDGTNYAVVHCTGYIKNWP</b>            | <b>2.7</b> |
| 208  | RLKQRNSLGPSRDGTNYAVVHCTGYIKNWPPT                  | 2.6        |
| 231  | GYIKNWPPTDMFPMHMERDVDDMSSHCC <b>L</b>             | 2          |
| 288  | <b>RHAMDGKFTFVDQ</b> RVLN <b>ILGYTPTELLGKICYD</b> | <b>3.2</b> |
| 312  | ELLGKICYDFFHPEDQSHMKESFDQVLKQKG                   | 2.9        |
| 335  | DQVLKQKGQMFSLLYRARAKNSEYVWLRT <b>QAY</b>          | 2.7        |
| 386  | GKTMHGAPLDAAAAHTPEQVQQQQQQEQ                      | 2.2        |
| 490  | PLAKIPKSGTSPTPVAPNSWAALRPQQQQQ                    | 2.2        |
| 493  | KIPKSGTSPTPVAPNSWAALRPQQQQQQQQP                   | 2.1        |



## NLStradamus cutoff 0,1

|                 |                                                      |
|-----------------|------------------------------------------------------|
| Posterior @ 0.1 | 11 - RFASRENHCEIERRRRNKMTAYITELSDMVPTCSALARKPDK - 52 |
|                 | 170 - K - 170                                        |

## NucPred

The NucPred score for your sequence is 0.76 (see [score help](#) below)

|     |                                                             |     |
|-----|-------------------------------------------------------------|-----|
| 1   | MDEANIQDKERFASRENHCEIE <u>RRRRN</u> KMTAYITELSDMVPTCSALARKP | 50  |
| 51  | DKLTILRMAVAHMKALRGTTGNTSSDGTYPSEFLTDQELKHLILEAADGFL         | 100 |
| 101 | FVVSCDSGRVIYVSDSVTPVLNYTQSDWYGTSLYEHHPDDREKIREQLS           | 150 |
| 151 | TQESQNAGRILDLKSGTVKKEGHQSSMRLSMGARRGFICRMRVGNVNPES          | 200 |
| 201 | MVSGHLNRLKQNSLGPSRDGTNYAVVHCTGYIKNWPPDTMFPMHMERD            | 250 |
| 251 | VDDMSSHCCLVAIGRLQVTSTAANDMSGSNQSEFITRHAMDGKFTFVDQ           | 300 |
| 301 | RVLNILEGYTPTELLGKICYDFFHPEDQSHMKESFDQVLKQKQMFSLLYR          | 350 |
| 351 | ARAKNSEYVWLRTQAYAFINPYTDEVEYIVCTNSSGKTMHGAPLDAAAAH          | 400 |
| 401 | TPEQVQQQQQQEQHVYVQAAPGVQDYARRELTPVGSATNDGMYQTHMLAMQ         | 450 |
| 451 | APTPQQQQQQQQRPGSAQTTPVGTYTDTTHSPYSAGGPSPLAKIPKSGTS          | 500 |
| 501 | PTPVAPNSWAALRPQQQQQQQPVTEGYQQQTSPARSPSGPTYTQLSAG            | 550 |
| 551 | NGNRQQAQPGAYQAGPPPPNAPGMWDWQQAGGHPHPPHPTAHPHHPHAH           | 600 |
| 601 | PGGPAGAGQPQGOEFSDDLQMLDHTPTTFEDLNINMFSTPFE                  | 642 |

## PSORTII

[NUCDISC: discrimination of nuclear localization signals](#)

pat4: RRRR (5) at 23  
pat7: none  
bipartite: none  
content of basic residues: 8.7%  
NLS Score: -0.16

## SeqNLS

**Prediction result (The predicted NLS(s) are underlined)**

: MDEANIQDKERFASRENHCEIERRRRNKMTAYITELSDMVPTCSALARKPDKLTILRMAV

**Definition of different colors in predictions**

| score range | color                                                                               |
|-------------|-------------------------------------------------------------------------------------|
| 0.1-0.3     |  |
| 0.3-0.5     |  |
| 0.5-0.7     |  |
| 0.7-0.8     |  |
| 0.8-0.86    |  |
| 0.86-0.89   |  |

>0.89 

The predicted NLS(s) (score cutoff = 0.3)

| Protein ID | Predicted NLS | Start | Stop | The highest score of matches within the prediction |
|------------|---------------|-------|------|----------------------------------------------------|
|------------|---------------|-------|------|----------------------------------------------------|

## ELM

No NLS/NES positive result

## NESFinder

| Position | NES        | Type  |
|----------|------------|-------|
| =====    | =====      | ===== |
| 259      | CLVAIGRLQV | 2-2-1 |

## LocNES

| Protein Name        | Position | Sequence        | Score |
|---------------------|----------|-----------------|-------|
| >LocNES1465456712_0 | 50-64    | LARKPDKLTILRMAV | 0.020 |
| >LocNES1465456712_0 | 53-67    | KPDKLTILRMAVAHM | 0.068 |
| >LocNES1465456712_0 | 56-70    | KLILRMAVAHMKAL  | 0.076 |
| >LocNES1465456712_0 | 83-97    | KPSFLTDQELKHLIL | 0.352 |
| >LocNES1465456712_0 | 91-105   | ELKHLILEAADGFLF | 0.081 |
| >LocNES1465456712_0 | 92-106   | LKHLILEAADGFLFV | 0.135 |
| >LocNES1465456712_0 | 93-107   | KHLILEAADGFLFVV | 0.072 |
| >LocNES1465456712_0 | 110-124  | DSGRVIYVSDSVTPV | 0.005 |
| >LocNES1465456712_0 | 183-197  | LSMGARRGFICRMV  | 0.010 |
| >LocNES1465456712_0 | 237-251  | IKNWPPTDMFPNMHM | 0.013 |
| >LocNES1465456712_0 | 258-272  | MSSHCCLVAIGRLQV | 0.036 |
| >LocNES1465456712_0 | 287-301  | SEFTRHAMDGKFTF  | 0.010 |
| >LocNES1465456712_0 | 295-309  | MDGKFTFVDQRLNI  | 0.030 |
| >LocNES1465456712_0 | 423-437  | AAPGVYARRELTPV  | 0.017 |
| >LocNES1465456712_0 | 439-453  | SATNDGMYQTHMLAM | 0.086 |
| >LocNES1465456712_0 | 622-636  | MLQMLDHTPTTFEDL | 0.350 |
| >LocNES1465456712_0 | 624-638  | QMLDHTPTTFEDLNI | 0.539 |

## NetNES 1.1 Server - prediction results

>Sequence - NetNES 1.1 prediction

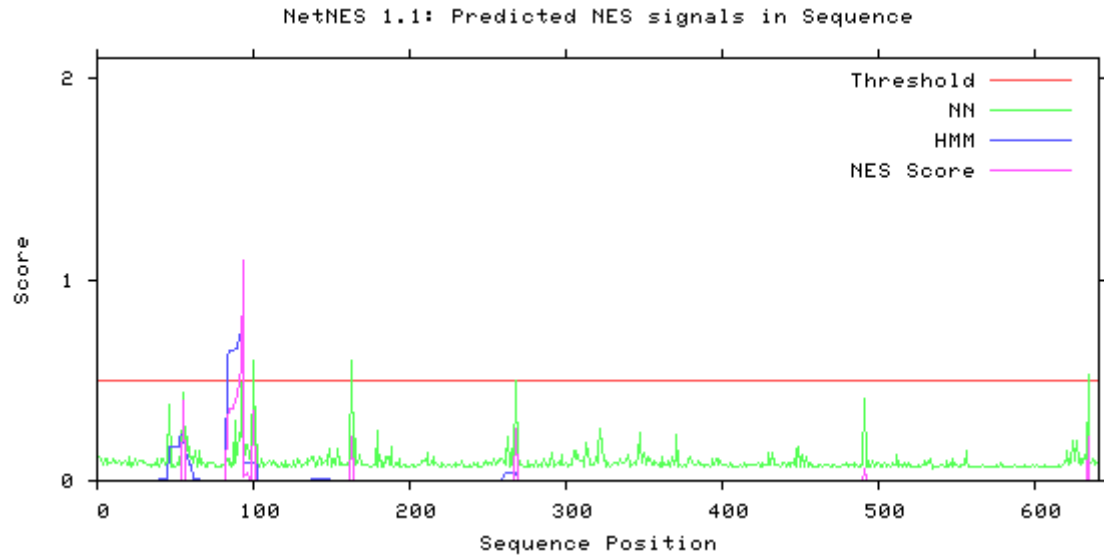

## CLUSTAL 2.1 MULTIPLE SEQUENCE ALIGNMENT

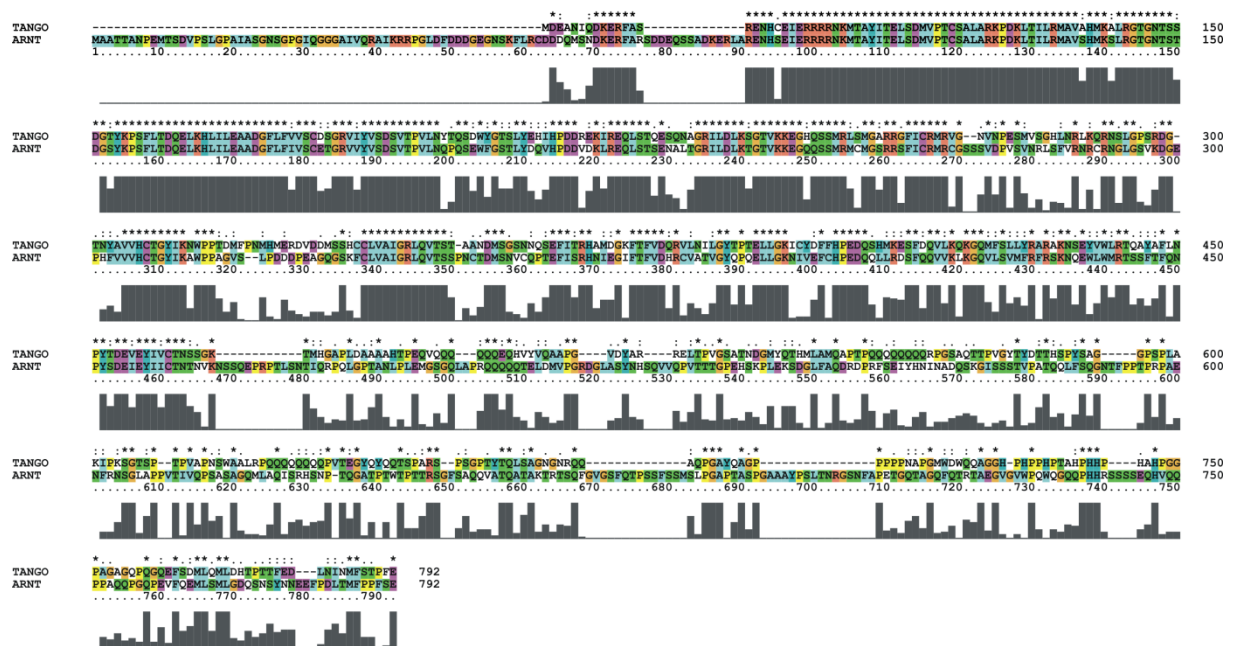

## CYCLE

```
>sp|O61734|CYCL_DROME Protein cycle OS=Drosophila melanogaster OX=7227
GN=cyc PE=1 SV=2
MEVQEFCEENMEEIEDENYDEEKSARTSDENRKQNHSEIEKRRRDKMNTYINELSSMIPMC
FAMQRKLDKLTVLRLMAVQHLRGIRGSGSLHPFNGSDYRPSFLSDQELKMIILQASEGFLF
VVGCDRGRILYVSDSVSSVLNSTQADLLGQSWFDVLHPKDIGKVKEQLSSLEQCPRERLI
DAKTMLPVKTDVPQSLCRLCPGARRSFFCRMKLRTASNNQIKEESDTSSSSRSSTKRKSR
LTTGHKYRVIQCTGYLKSWTPIKDEDQDADSDEQTTLNSCLVAIGRIPPVNRNSTVPASL
DNHPNIRHVLFISRHSGEKFLFIDQRATLVIGFLPQEILGTSFYEFYFHNEDIAALMESH
KMVMQVPEKVTTQVYFRCKDNSYIQLQSEWRAFKNPWTSEIDYIIAKNSVFL
```

## cNLS Mapper Result 2.0

### Predicted NLSs in query sequence

|                                                      |     |
|------------------------------------------------------|-----|
| MEVQEFCEENMEEIEDENYDEEKSARTSDENRKQNHSEIEKRRRRDKMNTYI | 50  |
| NELSSMIPMCFAMQKLDKLTVLRMAVQHLLRGIRSGSLHPFNGSDYRPS    | 100 |
| FLSDQELKMIILQASEGFLFVVGCDRGRILYVSDSVSSVLNSTQADLLGQ   | 150 |
| SWFDVLHPKDIGKVKEQLSSLEQCPRERLIDAKTMLPVKTDVPQSLCRLC   | 200 |
| PGARRSFFCRMKLRTASNNOIKEESDTSSSSRSSTKRKSRLTTGHKYRVI   | 250 |
| QCTGYLKSWTPIKDEDQDADSDEQTTNLSCLVAIGRIPPNVRNSTVPASL   | 300 |
| DNHPNIRHVLFISSRHSGEKFLFIDQRTLVIGFLPQEILGTSFYEFYFHN   | 350 |
| EDIAALMESHKVMQVPEKVTQVYRFRCKDNSYIQLQSEWRAFKNPWTS     | 400 |
| EIDYIIAKNSVFL                                        | 413 |

### Predicted monopartite NLS

| Pos. | Sequence    | Score |
|------|-------------|-------|
| 37   | EIEKRRRRDKM | 3     |

### Predicted bipartite NLS

| Pos. | Sequence                             | Score |
|------|--------------------------------------|-------|
| 37   | EIEKRRRRDKMNTYINELSSMIPMCFAMQR       | 3.7   |
| 37   | EIEKRRRRDKMNTYINELSSMIPMCFAMQKLDK    | 2.4   |
| 39   | EKRRRRDKMNTYINELSSMIPMCFAMQKLD       | 2.5   |
| 41   | RRRRDKMNTYINELSSMIPMCFAMQKLDKLT      | 4.8   |
| 154  | DVLHPKDIGKVKEQLSSLEQCPRERLIDAKTM     | 2.1   |
| 160  | DIGKVKEQLSSLEQCPRERLIDAKTMLPVKTD     | 2.3   |
| 176  | RERLIDAKTMLPVKTDVPQSLCRLCPGARRSFF    | 2.4   |
| 176  | RERLIDAKTMLPVKTDVPQSLCRLCPGARRSFFC   | 3.3   |
| 187  | PVKTDVPQSLCRLCPGARRSFFCRMKLRT        | 3.1   |
| 204  | RRSFFCRMKLRTASNNOIKEESDTSSSSRSSTKRKS | 2.9   |
| 210  | RMKLRTASNNOIKEESDTSSSSRSSTKRKS       | 4.3   |
| 232  | RSSTKRKSRLTTGHKYRVIQCTGYLKSWTPI      | 3.4   |
| 232  | RSSTKRKSRLTTGHKYRVIQCTGYLKSWTPIK     | 3     |
| 232  | RSSTKRKSRLTTGHKYRVIQCTGYLKSWTPIKDE   | 2.8   |
| 254  | GYLKSWTPIKDEDQDADSDEQTTNLSCLVAI      | 2.1   |
| 259  | WTPIKDEDQDADSDEQTTNLSCLVAIGRIPP      | 2     |

## NLStradamus

Pre-loaded models cut-off 0.1      4 state HMM static

Posterior @ 0.1      25 - RTSDENRKQNHSEIEKRRRRDKM - 46

## NucPred

The NucPred score for your sequence is 0.90 (see [score help](#) below)

```

  1  MEVQEFCENMEEIEDENYDEEKSARTSDENRKQNHSEIEKRRRDKMNTYI    50
 51  NELSSMIPMCFAMQRKLDKLTVLRLMAVQHRLRGIRSGSLHPFNGSDYRPS    100
101  FLSDQELKMIILQASEGFLFVVGCDRGRILYVSDSVSVLNSTQADLLGQ    150
151  SWFDVLHPKDIGKVKEQLSSLEQCPRERLIDAKTMLPVKTDVPQSLCRLC    200
201  PGARRSFFCRMKLRTASNQIKEESDTSSSSRSSTKRKSRLTTGHKYRVI    250
251  QCTGYLKSWTPIKDEDQDADSDEQTTNLSCLVAIGRIPPVNRNSTVPASL    300
301  DNHPNIRHVLFI SRHSGEGKFLFIDQRATLVIGFLPQEILGTSFYEYFHN    350
351  EDIAALMESHKVMVMQVPEKVTQTQVYRFRCKDNSYIQLQSEWRAFKNPWTS    400
401  EIDYIIAKNSVFL                                           413

```

Positively and negatively influencing subsequences are coloured according to the following scale:

(non-nuclear) negative ||||| positive (nuclear)

## PsortII

[NUCDISC: discrimination of nuclear localization signals](#)

```

pat4: KRRR (5) at 40
pat7: none
bipartite: none
content of basic residues: 13.6%
NLS Score: -0.16

```

## SeqNLS

**Prediction result (The predicted NLS(s) are underlined)**

cyc: MEVQEFCENMEEIEDENYDEEKSARTSDENRKQNHSEIEKRRRDKMNTYINELS SMIPMC

**The predicted NLS(s) (score cutoff = 0.5)**

| Protein ID | Predicted NLS | Start | Stop | The highest score of matches within the prediction |
|------------|---------------|-------|------|----------------------------------------------------|
| cyc        | SMIPMC        | 55    | 60   | 0.659                                              |

**Prediction result (The predicted NLS(s) are underlined)**

: MEVQEFCENMEEIEDENYDEEKSARTSDENRKQNHSEIEKRRRDKMNTYINELS SMIPMC

**Definition of different colors in predictions**

| score range | color                                                                               |
|-------------|-------------------------------------------------------------------------------------|
| 0.1-0.3     |  |
| 0.3-0.5     |  |

|           |                                                                                   |
|-----------|-----------------------------------------------------------------------------------|
| 0.5-0.7   |  |
| 0.7-0.8   |  |
| 0.8-0.86  |  |
| 0.86-0.89 |  |
| >0.89     |  |

**The predicted NLS(s) (score cutoff = 0.3)**

| Protein ID | Predicted NLS | Start | Stop | The highest score of matches within the prediction |
|------------|---------------|-------|------|----------------------------------------------------|
|            | SMIPMC        | 55    | 60   | 0.659                                              |

## ELM

**TRG\_NLS\_MonoExtC\_3**      TKRKSR      235-240      7.252e-04

Monopartite variant of the classical basically charged NLS. C-extended version.

**TRG\_NLS\_MonoExtN\_4**      KRKSRL      236-241      1.276e-03

Monopartite variant of the classical basically charged NLS. N-extended version.

No NES positive result

## NES Finder

Position    NES    Type

=====

50    INELSSMIPM    2-3-1

63    MQRKLDKLTV    3-2-1

66    KLDKLTVLRM    2-2-1

## LocNES

No NES candidates were found in your query protein

## NetNES 1.1 Server - prediction results

---

>Sequence - NetNES 1.1 prediction

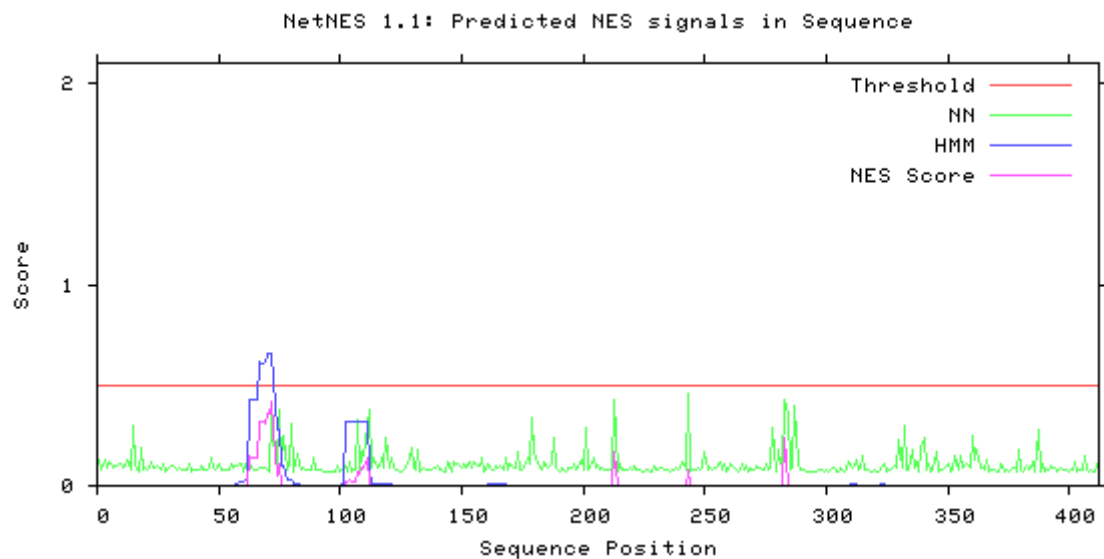

### CLUSTAL 2.1 MULTIPLE SEQUENCE ALIGNMENT

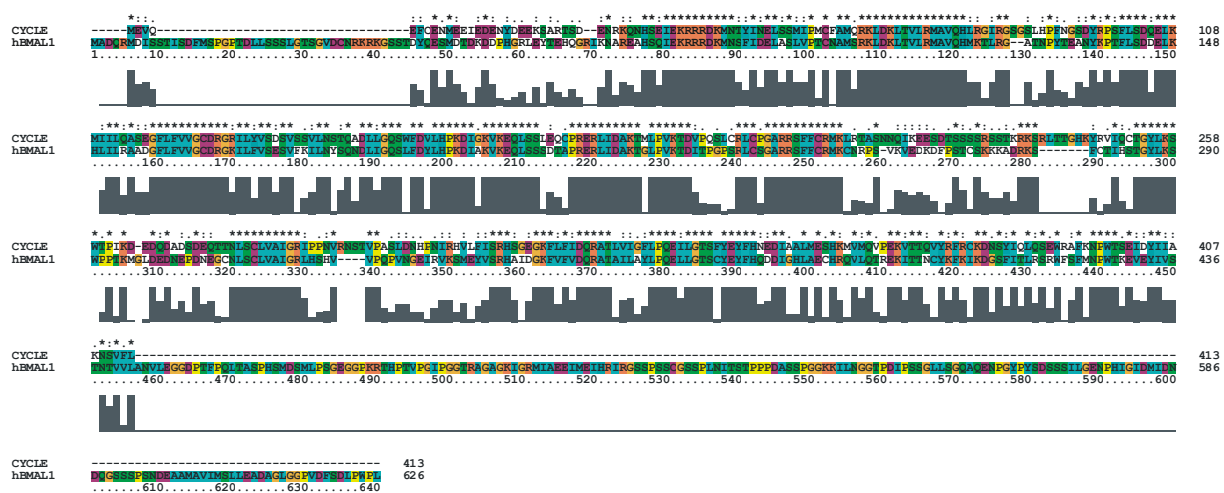

Supplement: s1 [file s1]
