# Supplementary material for: Subcellular Localization Signals of bHLH-PAS Proteins: Their Significance, Current State of Knowledge and Future Perspectives
Source: MDPI journal article supplement (doi:10.3390/ijms20194746), 2019-09-24

# Subcellular Localization Signals of bHLH-PAS Proteins: their Significance, Current State of Knowledge and Future Perspectives

Beata Greb-Markiewicz <sup>1,\*</sup> and Marta Kolonko <sup>1</sup>

## Supplementary Materials Table 2

### Predictors used for NLS prediction:

cNLS Mapper  
NLSTRADAMUS  
NucPred  
PSORTII  
SeqNLS  
ELM

### Predictors used for NES prediction:

ELM  
NES Finder  
NetNES  
LocNES

### hARNT

```
>sp|P27540|ARNT_HUMAN Aryl hydrocarbon receptor nuclear translocator  
OS=Homo sapiens OX=9606 GN=ARNT PE=1 SV=1  
MAATTANPEMTSDVPSLGPASGNSGPGIQGGGAIVQRAIKRRPGLDFDDDGEGNSKFL  
RCDDDDQMSNDKERFARSDDEQSSADKERLARENHSEIERRRRNKMTAYITELSDMVPTCS  
ALARKPDKLTILMAVSHMKSLRGTGNTSTDGSYKPSFLTDQELKHLILEAADGFLFIVS  
CETGRVYVSDSVTPVLNQPSSEWFGSTLYDQVHPDDVDKLRQLSTSENALTGRILDLK  
TGTVKKEGQQSSMRMCMGSRRSFICMRGSSSVDPVSVNRLSFVRNRCRNLGSKVDGE  
PHFVVVHCTGYIKAWPPAGVSLPDDDDPEAGQGSKFCLVAIGRLQVTSSPNCTDMSNVCQP  
TEFISRHNIEGIFTFVDHRCVATVGYQPQELLGKNIVEFCHPEDQQLLRDSFQQVVKLKG  
QVLSVMFRFRSKNQEWLWMRTSSFTFQNPYSDEIEYIICTNTNVKNSSQEPRPTLSNTIQ  
RPQLGPTANLPLEMGSGQLAPRQQQQQTELDMPGRDGLASYNHSQVVQPVTTTGPEHSK  
PLEKSDGLFAQDRDPRFSEIYHNINADQSKGISSSTVPATQQLFSQGNTFPPTPRPAENF  
RNSGLAPPVTIVQPSASAGQMLAQISRHSNPTQGATPTWTPTTRSGFSAQQVATQATAKT  
RTSQFGVGSFQTPSSFSSMSLPGAPTASPGAAAYPSLTNRGSNFAPETGQTAGQFQTRTA  
EGVGWVPQWQGGQPHHRSSSSEQHVQQPPAQQPGQPEVFQEMLSMLGDQSNSYNNEEFPD  
LTMFPPFSE
```

**cNLS Mapper Result score cut-off 2.0**

---

| Predicted NLSs in query sequence                           |     |
|------------------------------------------------------------|-----|
| MAATTANPEMTSDVPSLGPAIASGNSGPGIQGGGAIVQ <b>RAIKRRPGLDFD</b> | 50  |
| <b>DDGEGNSKFLRCD</b> DDQMSNDKERFARSDDEQSSADKERLARENHSEIERR | 100 |
| <b>RRNKMTAYITELSDMVPTCSALARKPDKLT</b> ILRMAVSHMKSLRGTGNTST | 150 |
| <b>DGSYKPSFLTDQELKHLILEAADGFLFIVSCE</b> TGRVVYVSDSVTPVLNQP | 200 |
| QSEWFGSTLYDQVHPDDVDKLRQLSTSENALT <b>GRILD</b> LKTGTVKKEGQQ | 250 |
| <b>SSMRMCMGSRRSFICRMRCGSSSVDPVSVNRLSFVRNRCRNLG</b> SVKDGE  | 300 |
| <b>PHFVVHCTGYIKAWPPAGVSLPDD</b> PEAGQGSKFCLVAIGRLQVTSSPN   | 350 |
| CTDMSNVCQPTEFISRHNIEGIFTFVDHRCVATVGYQP <b>QELLGKNIVEFC</b> | 400 |
| <b>HPEDQQLLRDSFQQVVKLGQVLSVMFRFRSKNQEWLWMRTS</b> SFTFQNPY  | 450 |
| SDEIEYIICNTNTNVKNSSQEPRTLST <b>TIQRPQLGPTANLPLEMGS</b> QLA | 500 |
| <b>PRQQQQQT</b> ELDMVPGRDGLASYNHSQVVQPVTTTGPEHSPLEKSDGLFA  | 550 |
| QDRDPRFSEIYHNINADQSKGISSSTVPATQQLFSQGNTPPTPRPAENF          | 600 |
| RNSGLAPPVTIVQPSASAGQMLAQISRHSNPTQGATPTWTPTTRSGFSAQ         | 650 |
| QVATQATAKTRTSQFGVGSFQTPSSFSMSLPGAPTASPGAAAYPSLTNR          | 700 |
| GSNFAPETGQTAGQFQTRTAEGVGWVPQWQGGQPPHRRSSSEQHVVQPPA         | 750 |
| QQPGQPEVFQEMLSMLGDQNSYNNEEFDLTMFPFSE                       | 789 |

#### Predicted monopartite NLS

| Pos. | Sequence   | Score |
|------|------------|-------|
| 39   | RAIKRRPGLD | 5     |

#### Predicted bipartite NLS

| Pos. | Sequence                                     | Score |
|------|----------------------------------------------|-------|
| 39   | <b>RAIKRRPGLDFDD</b> DGEGNSKFLRCD            | 8.6   |
| 39   | RAIKRRPGLDFDDDGEGNSKFLRCD <b>DDQM</b>        | 2.3   |
| 39   | RAIKRRPGLDFDDDGEGNSKFLRCD                    | 2.5   |
| 91   | RENHSEIERRRRNKMTAYITELSDMVPTCSALARKP         | 2.8   |
| 96   | EIERRRRNKMTAYITELSDMVPTCSALARKPD             | 2.6   |
| 96   | EIERRRRNKMTAYITELSDMVPTCSALARKPDK            | 2.6   |
| 98   | ERRRRNKMTAYITELSDMVPTCSALARKPD               | 3.3   |
| 99   | <b>RRRRNKMTAYITELSDMVPTCSALARKPDKLT</b>      | 4.6   |
| 99   | RRRRNKMTAYITELSDMVPTCSALARKPDKLT <b>I</b>    | 3     |
| 151  | <b>DGSYKPSFLTDQELKHLILEAADGFLFIVSCE</b>      | 2.3   |
| 235  | RILD <del>LKTGTVKKEGQQSSMRMCMGSRRSFICR</del> | 2.1   |
| 260  | <b>RRSFICRMRCGSSSVDPVSVNRLSFVRNRCRNG</b>     | 2.3   |
| 286  | RNRCRNLGSGVKDGE <b>PHFVVHCTGYIKAWPP</b>      | 2.4   |
| 310  | <b>GYIKAWPPAGVSLPDD</b> PEAGQGSKFCLV         | 2.6   |
| 390  | <b>ELLGKNIVEFCHPEDQQLLRDSFQQVVKLG</b>        | 3.1   |
| 409  | RDSFQQVVKLGQVLSVMFRFRSKNQEWLWMRTS            | 2.2   |
| 478  | <b>TIQRPQLGPTANLPLEMGS</b> QLAPRQQQQQT       | 2.1   |

NLStradamus cut-off 0,1

|                 |                                                           |
|-----------------|-----------------------------------------------------------|
| Posterior @ 0.1 | 34 - GAIVQRAIKRRPGL - 47                                  |
|                 | 83 - SADKERLARENHSEIERRRRNKMTAYITELSDMVPTCSALARKPDK - 128 |

## NucPred

The NucPred score for your sequence is 0.88 (see [score help](#) below)

```
1  MAATTANPEMTSDVPSLGPAIASGNSGPGIQGGGAIVQRAIKRRPGLDFD 50
51 DDGEGNSKFLRCDDDDQMSNDKERFARSDDEQSSADKERLARENHSEIERR 100
101 RRNKMTAYITELSDMVPTCSALARKPDKLTILRMAVSHMKSLRGTGNTST 150
151 DGSYKPSFLTDQELKHLILEAADGFLFIVSCETGRVVYVSDSVTPVLNQ 200
201 QSEWFGSTLYDQVHPDDVDKLRQLSTSENALTGRILDLTGTGTVKKEGQQ 250
251 SSMRMCMSRRSFICMRMGSSSVDPVSVNRLSFVRNRCRNLGSKVDGE 300
301 PHFVVVHCTGYIKAWPPAGVSLPDDDDPEAGQGSKFCLVAIGRLQVTSSPN 350
351 CTDMSNVCQPTEFISRHNIEGIFTFVDHRCVATVGYQPQELLGKNIVEFC 400
401 HPEDQQLLRDSFQQVVKLGQVLSVMFRFRSKNQEWLWMRTSSFTFQNPY 450
451 SDEIEYIICTNTNVKNSSQEPRPTLSNTIQRPQLGPTANLPLEMGSGQLA 500
501 PRQQQQQTTELDMPGRDGLASYNHSQVVQPVTGPEHSPLEKSDGLFA 550
551 QDRDPRFSEIYHNINADQSKGISSSTVPATQQLFSQNTFPPTPRPAENF 600
601 RNSGLAPPVTIVQPSASAGQMLAQISRHSNPTQGATPTWPTPTRSGFSAQ 650
651 QVATQATAKTRTSQFGVGSFQTPSSSFSSMSLPGAPTASPGAAAYPSLTNR 700
701 GSNFAPETGQTAGQFQTRTAEGVGWVQWQGGQPHRRSSSSEQHVQQPPA 750
751 QQPGQPEVVFQEMLSMLGDQSNSYNNEEFPDLTMFPPFSE 789
```

Positively and negatively influencing subsequences are coloured according to the following scale:

(non-nuclear) negative ||||| positive (nuclear)

## PSORTII

[NUCDISC: discrimination of nuclear localization signals](#)

```
pat4: KRRP (4) at 42
pat4: RRRR (5) at 99
pat7: none
bipartite: none
content of basic residues: 9.4%
NLS Score: 0.09
```

## SeqNLS

**Prediction result (The predicted NLS(s) are underlined)**

ARNT: MAATTANPEMTSDVPSLGPAIASGNSGPGIQGGGAIVQRAIKRRPGLDFDDDGEGNSKFL

**Definition of different colors in predictions**

| score range | color                                                                               |
|-------------|-------------------------------------------------------------------------------------|
| 0.1-0.3     |  |
| 0.3-0.5     |  |
| 0.5-0.7     |  |

|           |                                                                                   |
|-----------|-----------------------------------------------------------------------------------|
| 0.7-0.8   |  |
| 0.8-0.86  |  |
| 0.86-0.89 |  |
| >0.89     |  |

The predicted NLS(s) (score cutoff = 0.5)

| Protein ID | Predicted NLS | Start | Stop | The highest score of matches within the prediction |
|------------|---------------|-------|------|----------------------------------------------------|
| ARNT       | RAIKRRPGLDFD  | 39    | 50   | 0.820                                              |

## ELM

TRG\_NLS\_MonoExtN\_4      RAIKRRPG      39-46      Probability 1.276e-03

Monopartite variant of the classical basically charged NLS. N-extended version.

No NES positive result

## NESFinder

Position    NES    Type

=====

336    CLVAIGRLQV    2-2-1

## LocNES

| Protein Name       | Position | Sequence        | Score |
|--------------------|----------|-----------------|-------|
| >LocNES827787822_0 | 126-140  | LARKPDKLTILRMAV | 0.005 |
| >LocNES827787822_0 | 129-143  | KPDKLTILRMAVSHM | 0.042 |
| >LocNES827787822_0 | 132-146  | KLTILRMAVSHMKSL | 0.041 |
| >LocNES827787822_0 | 159-173  | KPSFLTDQELKHLIL | 0.222 |
| >LocNES827787822_0 | 167-181  | ELKHLILEAADGFLF | 0.039 |
| >LocNES827787822_0 | 168-182  | LKHLILEAADGFLFI | 0.113 |
| >LocNES827787822_0 | 169-183  | KHLILEAADGFLFIV | 0.069 |
| >LocNES827787822_0 | 179-193  | FLFIVSCETGRVVYV | 0.003 |
| >LocNES827787822_0 | 186-200  | ETGRVVYVSDSVTPV | 0.006 |

|                    |         |                  |       |
|--------------------|---------|------------------|-------|
| >LocNES827787822_0 | 274-288 | GSSSVDPVSVNRLSF  | 0.308 |
| >LocNES827787822_0 | 335-349 | QGSKFCLVAIGRLQV  | 0.030 |
| >LocNES827787822_0 | 408-422 | DQQLLRDSFQQVVKL  | 0.083 |
| >LocNES827787822_0 | 415-429 | SFQQVVKLKKGQVLSV | 0.079 |
| >LocNES827787822_0 | 417-431 | QQVVKLKKGQVLSVMF | 0.198 |
| >LocNES827787822_0 | 436-450 | KNQEWLWMRTSSFTF  | 0.046 |
| >LocNES827787822_0 | 482-496 | TIQRPQLGPTANLPL  | 0.071 |
| >LocNES827787822_0 | 484-498 | QRPQLGPTANLPLEM  | 0.086 |
| >LocNES827787822_0 | 671-685 | VGSFQTPSSFSSMSL  | 0.104 |
| >LocNES827787822_0 | 715-729 | TAGQFQTRTAEGVG   | 0.021 |

## NetNES 1.1 Server - prediction results

>sp\_P27540\_ARNT\_HUMAN - NetNES 1.1 prediction

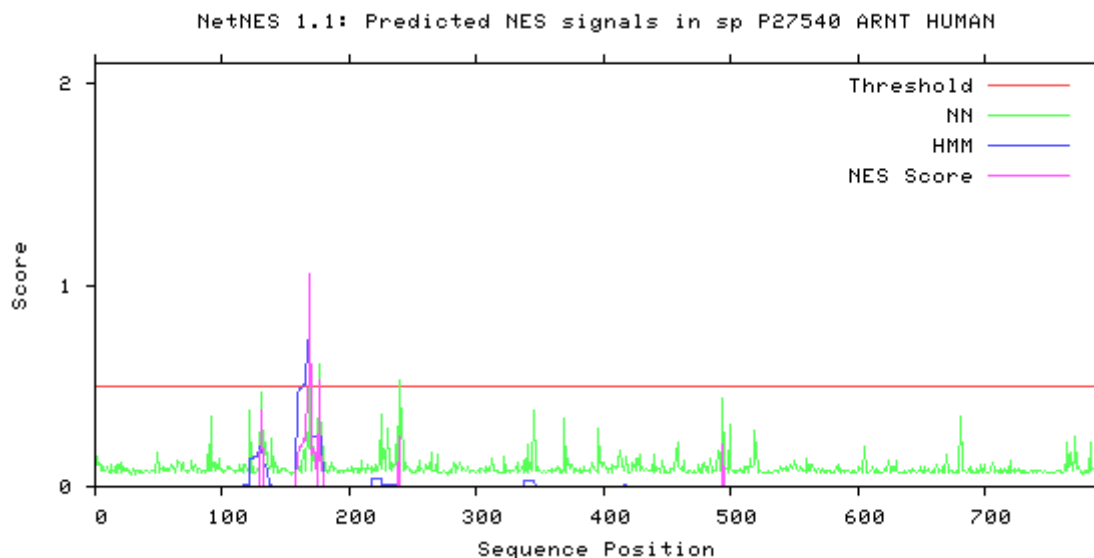

## hARNT2

```
>sp|Q9HBZ2|ARNT2_HUMAN Aryl hydrocarbon receptor nuclear translocator 2
OS=Homo sapiens OX=9606 GN=ARNT2 PE=1 SV=2
MATPAAVNPPEMASDIPGSVTLPVAPMAATGQVRMAGAMPARGGKRRSGMDFDDEDEGEGP
SKFSRENHSEIERRRRNKMTQYITELSDMVPTCSALARKPDKLTILRMAVSHMKSMRGTG
NKSTDGAYKPSFLTEQELKHLILEAADGFLFVVAETGRVIYVSDSVTPVLNQPSSEWFG
STLYEQVHPDDVEKLREQLCTSENSMTGRILDLTGTVKKEGQQSSMRMCMGSRRSFICR
MRCGNAPLDHLPLNRITTMKRFRNGLGPVKEGEAQYAVVHCTGYIKAWPPAGMTIPEED
ADVGGQSKYCLVAIGRLQVTSSPVCMDMNGMSVPTEFLSRHNSDGIITFVDPRCISVIGY
QPQDLLGKDILEFCHPEDQSHLRESFQQVVKLKKGQVLSVMYRFRTKNREWMLIRTSSFTF
QNPYSDEIEYIICTNTNVKQLQQQQAELVHQDGLSSYDLSQVPVPNLPAGVHEAGKSV
EKADAIIFSQERDPRFAEMFAGISASEKKMMSSASAAGTQQIYSQGSFPFSGHSGKAFSSS
VVHVPGVNDIQSSSSTGQNMSQISRQLNQSQVAWTGSRPPFPQQIPSQSSKTQSSPFGI
GTSHTYPADPSSYSPLSSPATSSPSGNAYSSLANRTPGFAESGQSSGQFQGRPSEVWSQW
QSQHHGQQSGEQSHSQPQGQTEVFQDMLPMPGDPTQGTGNYNIEDFADLGMFPFPFSE
```

## cNLS Mapper Result score cut-off 2.0

| Predicted NLSs in query sequence                            |                          |     |
|-------------------------------------------------------------|--------------------------|-----|
| MATPAAVNPPEMASDIPGSVTLPVAPMAATGQV                           | <b>RMAGAMPARGGKRRSGM</b> | 50  |
| <b>DFDDEDEGEGPSKFSRENHSEIERRRRNKMTQYITELSDMVPTCSALARKP</b>  |                          | 100 |
| <b>DKLTI</b> LRMAVSHMKSMRGTGNKSTDGAYKPSFLTEQELKHLILEAADGFL  |                          | 150 |
| FVVAAETGRVIYVSDSVTPVLNQPSSEWFGSTLYEQVHPDDVEKLREQLC          |                          | 200 |
| TSSENSMTG <b>RILDLKTGT</b> VKKEGQSSMRMCMGSRRSFICRMRCGNAPLDH |                          | 250 |
| <b>LPLNRIT</b> TMKRFRNGLGPVKEGEAQYAVVHCTGYIKAWPPAGMTIPEED   |                          | 300 |
| <b>ADVGGQSKYCLV</b> AIGRLQVTSSPVCMDMNGMSVPTEFLSRHNSDGIITFV  |                          | 350 |
| DPRCISVIGYQPQ <b>DLGKDILEFCHPEDQSHLRESFQQVVKLGQVLSVM</b>    |                          | 400 |
| <b>YRFR</b> TKNREWMLIRTSSTTFQNPYSDEIEYIICTNTNVKQLQQQQAELV   |                          | 450 |
| HQRDGLSSYDLSQVPVPNLPAGVHEAGKSVEKADAFSQERDPRFAEMFA           |                          | 500 |
| GISASEKKMMSSASAAGTQQIYSQGSFPFSGHSGKAFSSSVVHVPGVNDI          |                          | 550 |
| QSSSSTGQNMSQISRQLNQSQVAWTGSRPPFPGQQIPQS <b>SKTQSSPFGI</b>   |                          | 600 |
| <b>GTSHTYPADPSSYSPLSSP</b> ATSSPSGNAYSSLANRTPGFAESGQSSGQFQ  |                          | 650 |
| GRPSEVWSQWQSQHHGQSGEQHSHQPGQTEVFQDMLPMPGDPTQGTGN            |                          | 700 |
| YNIEDFADLGMFPFSE                                            |                          | 717 |

| Predicted monopartite NLS |                    |       |
|---------------------------|--------------------|-------|
| Pos.                      | Sequence           | Score |
| 42                        | RGGKRRSGMD         | 4     |
| 42                        | RGGKRRSGMDF        | 2.5   |
| 256                       | <b>IT</b> TMKRFRNG | 6     |

| Predicted bipartite NLS |                                         |             |
|-------------------------|-----------------------------------------|-------------|
| Pos.                    | Sequence                                | Score       |
| 34                      | RMAGAMPARGGKRRSGMDFDDEDEGEGPSKFSRE      | 2.1         |
| 42                      | <b>RGGKRRSGMDFDDEDEGEGPSKFSRE</b>       | <b>10.5</b> |
| 42                      | RGGKRRSGMDFDDEDEGEGPSKFSREN             | 2.5         |
| 42                      | RGGKRRSGMDFDDEDEGEGPSKFSRENHSEI         | 3.8         |
| 42                      | RGGKRRSGMDFDDEDEGEGPSKFSRENHSEIE        | 3.3         |
| 42                      | RGGKRRSGMDFDDEDEGEGPSKFSRE              | 4.6         |
| 42                      | RGGKRRSGMDFDDEDEGEGPSKFSRENHSEIE        | 2           |
| 65                      | RENHSEIERRRRNKMTQYITELSDMVPTCSALARKP    | 2.8         |
| 70                      | EIERRRRNKMTQYITELSDMVPTCSALARKPD        | 2.6         |
| 70                      | EIERRRRNKMTQYITELSDMVPTCSALARKPDK       | 2.6         |
| 72                      | ERRRRNKMTQYITELSDMVPTCSALARKPD          | 3.3         |
| 73                      | <b>RRRRNKMTQYITELSDMVPTCSALARKPDKLT</b> | <b>4</b>    |
| 73                      | RRRRNKMTQYITELSDMVPTCSALARKPDKLT        | 2.6         |
| 209                     | RILDLKTGTVKKEGQSSMRMCMGSRRSFICR         | 2.1         |
| 228                     | RMCMGSRRSFICRMRCGNAPLDHLPLNRITTMRK      | 2.2         |
| 228                     | RMCMGSRRSFICRMRCGNAPLDHLPLNRITTMR       | 2           |
| 234                     | RRSFICRMRCGNAPLDHLPLNRITTMKRFRNG        | 3.2         |
| 255                     | RITTMKRFRNGLGPVKEGEAQYAVVHCTGYIK        | 2.6         |
| 255                     | RITTMKRFRNGLGPVKEGEAQYAVVHCTGYI         | 2.9         |
| 255                     | RITTMKRFRNGLGPVKEGEAQYAVVHCTGYIKAW      | 2.2         |

|     |                                    |     |
|-----|------------------------------------|-----|
| 260 | RKRFRNGLGPVKEGEAQYAVVHCTGYIKAWPP   | 2.4 |
| 284 | GYIKAWPPAGMTIPEEDADVQGSKYCLV       | 2.1 |
| 364 | DLLGKDILEFCHPEDQSHLRESFQQVVKLG     | 3.4 |
| 383 | RESFQQVVKLGQVLSVMYRFRFTKNREWMLIRTS | 2   |
| 591 | SKTQSSPFGIGTSHTYPADPSSYSPLSSP      | 2.1 |

NLStradamus cut off 0.1

|                 |                                                                      |
|-----------------|----------------------------------------------------------------------|
| Posterior @ 0.1 | 34 -<br>RMAGAMPARGGKRRSGMDFDDDEDGEGPSKFSRENHSEIERRRRNKMTQYITE-<br>85 |
|                 | 95 - ALARKPDK - 102                                                  |
|                 | 258 - TMRKRFRNGLGP - 269                                             |

NucPred

The NucPred score for your sequence is 0.89 (see [score help](#) below)

|     |                                                     |     |
|-----|-----------------------------------------------------|-----|
| 1   | MATPAAVNPPEMASDIPGSVTLPVAPMAATGQVRMAGAMPARGGKRRSGM  | 50  |
| 51  | DFDDEDGEGPSKFSRENHSEIERRRRNKMTQYITELSDMVPTCSALARKP  | 100 |
| 101 | DKLTILRMAVSHMKSMRGTEGNKSTDGAYKPSFLTEQELKHLILEAADGFL | 150 |
| 151 | FVVAETGRVIYVSDSVTPVLNQPPQSEWFGSTLYEQVHPDDVEKLRQLC   | 200 |
| 201 | TSENSMTGRILDLTGTGTVKKEGQSSMRMCMGSRRSFICRMRCGNAPLDH  | 250 |
| 251 | LPLNRITTMRKFRNGLGPVKEGEAQYAVVHCTGYIKAWPPAGMTIPEED   | 300 |
| 301 | ADVQGSKYCLVAIGRLQVTSSPVCMDMNGMSVPTEFLSRHNSDGIITFV   | 350 |
| 351 | DPRCISVIGYQPQDLLGKDILEFCHPEDQSHLRESFQQVVKLGQVLSVM   | 400 |
| 401 | YRFRFTKNREWMLIRTSSFTFQNPYSDEIEYIICTNTNVKQLQQQAELEV  | 450 |
| 451 | HQRDGLSSYDLSQVPVNLPAQVHEAGKSVEKADAIQSQERDPRFAEMFA   | 500 |
| 501 | GISASEKKMMSSASAAGTQQIYSQGSPPFSGHSGKAFSSSVVHVPGVNDI  | 550 |
| 551 | QSSSSTGQNMSQISRQLNQSQVAWTGSRPPFPGQQIPSQSSKTQSSPFGI  | 600 |
| 601 | GTSHTYPADPSSYSPLSSPATSSPSGNAYSSLANRTPGFAESGQSSGQFQ  | 650 |
| 651 | GRPSEVWSQWQSQHSGEQSHSQPGQTEVFQDMLPMPGDPDPTQGTGN     | 700 |
| 701 | YNIEDFADLGMFPFSE                                    | 717 |

Positively and negatively influencing subsequences are coloured according to the following scale:

(non-nuclear) negative ||||| positive (nuclear)

PSORT II

[NUCDISC: discrimination of nuclear localization signals](#)

pat4: RRRR (5) at 73  
pat7: none  
bipartite: none  
content of basic residues: 9.3%

NLS Score: -0.16

## SeqNLS

**Prediction result (The predicted NLS(s) are underlined)**

Arnt2: MATPAAVNPPEMASDIPGSVTLPVAPMAATGQVRMAGAMMPARGGKRRSGMDFDDEDGEGP

**Definition of different colors in predictions**

| score range | color                                                                             |
|-------------|-----------------------------------------------------------------------------------|
| 0.1-0.3     |  |
| 0.3-0.5     |  |
| 0.5-0.7     |  |
| 0.7-0.8     |  |
| 0.8-0.86    |  |
| 0.86-0.89   |  |
| >0.89       |  |

**The predicted NLS(s) (score cutoff = 0.5)**

| Protein ID | Predicted NLS   | Start | Stop | The highest score of matches within the prediction |
|------------|-----------------|-------|------|----------------------------------------------------|
| Arnt2      | MPARGGKRRSGMD   | 39    | 51   | 0.883                                              |
| Arnt2      | DIPGSVTLPVAPMAA | 15    | 29   | 0.862                                              |

## ELM

**TRG\_NLS\_MonoExtC\_3**      MRKRFR      259-264      Probability 7.252e-04

Monopartite variant of the classical basically charged NLS. C-extended version.

**TRG\_NLS\_MonoExtN\_4**      Probability 1.276e-03

RGGKRRSG      42-49

RKRFRN      260-265

Monopartite variant of the classical basically charged NLS. N-extended version.

No positive NES result

## NES Finder 0.2



Position    NES    Type

=====

310    CLVAIGRLQV    2-2-1

702    NIEDFADLGM    2-2-1

## LocNES

No NES candidate

## NetNES 1.1 Server - prediction results

>Sequence - NetNES 1.1 prediction

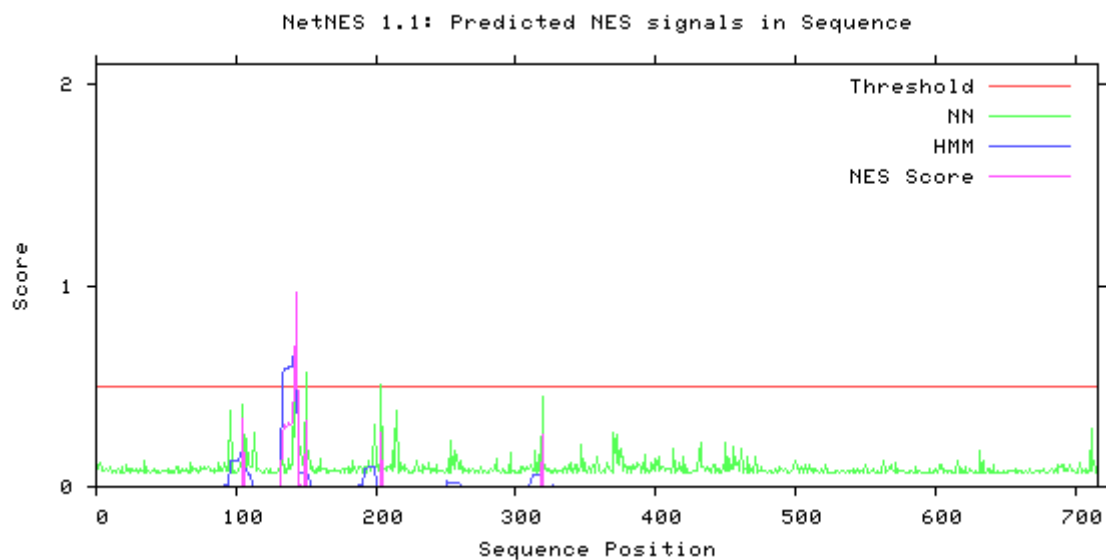

## hBMAL1

```
>sp|O00327|BMAL1_HUMAN Aryl hydrocarbon receptor nuclear translocator-like
protein 1 OS=Homo sapiens OX=9606 GN=ARNTL PE=1 SV=2
MADQRMDISSTISDFMSPGPTDLLSSSLGTSGVDCNRKRKGSSTDYQESMDTDKDDPHGR
LEYTEHQGRIKNAREAHSQIEKRRRDKMNSFIDELASLVPTCNAMSRKLDKLTVLRMAVQ
HMKTLRGATNPYTEANYKPTFLSDDELKHLILRAADGFLFVVGCDRGKILFVSESVFKIL
NYSQNDLIGQSLFDYLHPKDIKVKQELSSSDTAPRERLIDAKTGLPVKTDITPGPSRLC
SGARRSFFCRMKCNRPVSVKVEDKDFPSTCSKKKADRKSFCTIHSTGYLKSWPPTKMGLDE
DNEPDNEGCNLSCLVAIGRLHSHVVPQPVNGEIRVKSMEYVSRHAIDGKFVFDQRATAI
LAYLPQELLGTSCYEYFHQDDIGHLAECHRQVLQTREKITTNCYKFKIKDGSFITLRSRW
FSFMNPWTKEVEYIVSTNTVVLANVLEGGDPTFPQLTASPHSMDSMLPSGEGGPKRTHPT
VPGIPGGTRAGAGKIGRMIAEEIMEIHRIRGSSPSSCGSSPLNITSTPPPDASSPGGKKI
LNGGTPDIPSSGLLSGQAQENPGYPYSDSSSILGENPHIGIDMIDNDQGSSSPSNDEAAM
AVIMSLLEADAGLGGPVDFSDLPWPL
```

## cNLS Mapper Result 2.0

### Predicted NLSs in query sequence

|                                                     |     |
|-----------------------------------------------------|-----|
| MADQRMDISSTISDFMSPGPTDLLSSSLGTSGVDCNRKRKGSSTDYQESM  | 50  |
| DTDKDDPHGRLEYTEHQGRIKNAREAHSQIEKRRRDKMNSFIDELASLVP  | 100 |
| TCNAMSRKLDKLTVLRMAVQHMKTTLRGATNPYTEANYKPTFLSDELKHL  | 150 |
| ILRAADGFLFVVGCDRGKILFVSESVFKILNYSQNDLIGQSLFDYLHPKD  | 200 |
| IAKVKEQLSSSDTAPRERLIDAKTGLPVKTDITPGPSRLCSGARRSFFCR  | 250 |
| MKCNRPSPVKVEDKDFPSTCSKKKADRKSFCTIHSTGYLKSWPPTKMGLDE | 300 |
| DNEPDNEGCNLSCLVAIGRLHSHVVPQPVNGEIRVKSMEYVSRHAIDGKF  | 350 |
| VFVDQRATAILAYLPQELLGTSCYEYFHQDDIGHLAECHRQVLQTREKIT  | 400 |
| TNCYKFKIKDGSFITLRSRWFSFMNPWTKEVEYIVSTNTVVLANVLEGGD  | 450 |
| PTFPQLTASPHSMDSMLPSGEGGPKRTHPTVPGIPGGTRAGAGKIGRMIA  | 500 |
| EEIMEIHRIRGSSPSSCGSSPLNITSTPPPDASSPGGKKILNGGTPDIPS  | 550 |
| SGLLSGQAQENPGYPYSDSSSILGENPHIGIDMIDNDQGSSSPSNDEAAM  | 600 |
| AVIMSLLEADAGLGGPVDFSDLPWPL                          | 626 |

### Predicted monopartite NLS

| Pos. | Sequence    | Score |
|------|-------------|-------|
| 34   | DCNRKRKGSST | 5     |
| 79   | QIEKRRRDKM  | 5     |

### Predicted bipartite NLS

| Pos. | Sequence                            | Score |
|------|-------------------------------------|-------|
| 34   | DCNRKRKGSSTDYQESMDTDKDDPHGRLEYT     | 4.3   |
| 34   | DCNRKRKGSSTDYQESMDTDKDDPHGRLEYTE    | 4.8   |
| 37   | RKRKGSSTDYQESMDTDKDDPHGRLEYTEH      | 2.6   |
| 74   | REAHSQIEKRRRDKMNSFIDELASLVPTCNAMSRK | 2.8   |
| 74   | REAHSQIEKRRRDKMNSFIDELASLVPTCNAMSR  | 4.3   |
| 80   | IEKRRRDKMNSFIDELASLVPTCNAMSRKLDK    | 2.4   |
| 81   | EKRRRDKMNSFIDELASLVPTCNAMSRKLD      | 2.6   |
| 83   | RRRDKMNSFIDELASLVPTCNAMSRKLDKLT     | 5.4   |
| 83   | RRRDKMNSFIDELASLVPTCNAMSRKLDKLT     | 2.1   |
| 123  | KTLRGATNPYTEANYKPTFLSDELKHLIL       | 2.1   |
| 174  | ESVFKILNYSQNDLIGQSLFDYLHPKDIKVK     | 3.1   |
| 194  | DYLHPKDIKVKKEQLSSSDTAPRERLIDAKTG    | 2     |
| 212  | DTAPRERLIDAKTGLPVKTDITPGPSRLCSG     | 2.3   |
| 216  | RERLIDAKTGLPVKTDITPGPSRLCSGARRSFF   | 2     |
| 216  | RERLIDAKTGLPVKTDITPGPSRLCSGARRSFFC  | 3.2   |
| 227  | PVKTDITPGPSRLCSGARRSFFCRMKNRP       | 2.6   |
| 244  | RRSFFCRMKNRPSVKVEDKDFPSTCSKKKAD     | 3.3   |
| 244  | RRSFFCRMKNRPSVKVEDKDFPSTCSKKKADRK   | 4.5   |
| 244  | RRSFFCRMKNRPSVKVEDKDFPSTCSKKKAD     | 4     |
| 244  | RRSFFCRMKNRPSVKVEDKDFPSTCSKKKADRK   | 4.6   |
| 244  | RRSFFCRMKNRPSVKVEDKDFPSTCSKKKADRKS  | 3.4   |
| 244  | RRSFFCRMKNRPSVKVEDKDFPSTCSKKKADRK   | 3     |
| 250  | RMKNRPSVKVEDKDFPSTCSKKKADRKSFCTI    | 2.7   |
| 268  | TCSKKKADRKSFCTIHSTGYLKSWPPTKMGLDE   | 2.1   |
| 272  | KKADRKSFCTIHSTGYLKSWPPTKMGLDE       | 3.4   |
| 291  | WPPTKMGLDEDEDNEPDNEGCNLSCLVAIGRL    | 2.7   |
| 291  | WPPTKMGLDEDEDNEPDNEGCNLSCLVAIGRLHS  | 3     |
| 407  | KIKDGSFITLRSRWFSFMNPWTKEVEYI        | 2.5   |
| 471  | EGGPKRTHPTVPGIPGGTRAGAGKIGRMI       | 3.7   |

|     |                                          |            |
|-----|------------------------------------------|------------|
| 471 | <b>EGGPKRTHPTVPGIPGGTRAGAGKIGRMIAEE</b>  | <b>3.8</b> |
| 489 | <b>RAGAGKIGRMIAEEIMEIHRIRGSSPSSCGSSP</b> | 2.7        |
| 535 | <b>PGGKKILNGGTPDIPSSGLLSGQAQENPGYP</b>   | 2.2        |

NLStradamus cutoff 0,1

37 - RKRKGSSTDYQESMDTDKDDPHGRLEYTEHQGRIKNAREAHSQIEKRRRDKMNSF - 91

258 - VKVEDKDFPSTCSKKKADRKSF - 279

472 - GGPKRTHPTVPGIPGGTRAGAGKIGRMI - 499

## NucPred

The NucPred score for your sequence is 0.87 (see [score help](#) below)

|     |                                                            |     |
|-----|------------------------------------------------------------|-----|
| 1   | MADQRMDISSTISDFMSPGPTDLLSSSLGTSGVDCN <b>RKRKGSSTDYQESM</b> | 50  |
| 51  | DTDKDDPHGRLEYTEHQGRIKNAREAHSQIE <b>KRRRDKMNSFIDELASLVP</b> | 100 |
| 101 | TCNAMSRKLDKLTVLRLMAVQHMKTLRGATNPYTEANYKPTFLSDDELKHL        | 150 |
| 151 | ILRAADGFLFVVGCDRGKILFVSESVFKILNYSQNDLIGQSLFDYLHPKD         | 200 |
| 201 | IAKVKEQLSSSDTAPRERLIDAKTGLPVKTDITPGPSRLCSGARRSFFCR         | 250 |
| 251 | MKCNRPSPVKVEDKDFPSTCSKKKADRKSFCTIHSTGYLKSWPPTKMGLDE        | 300 |
| 301 | DNEPDNEGCNLSCLVAIGRLHSHVVPQPVNGEIRVKSMEYVSRHAIDGKF         | 350 |
| 351 | VFVDQRATAILAYLPQELLGTSCYEYFHQDDIGHLAECHRQVLQTREKIT         | 400 |
| 401 | TNCYKFKIKDGSFITLRSRWFSEFMNPWTKEVEYIVSTNTVVLANVLEGGD        | 450 |
| 451 | PTFPQLTASPHSMDSMLPS <b>EGGPKRTHPTVPGIPGGTRAGAGKIGRMIA</b>  | 500 |
| 501 | EEIMEIHRIRGSSPSSCGSSPLNITSTPPPDASSPGGKKILNGGTPDIPS         | 550 |
| 551 | SGLLSGQAQENPGYPYSDSSSILGENPHIGIDMIDNDQSSSSPSNDEAAM         | 600 |
| 601 | AVIMSLLEADAGLGGPVDFSDLPWPL                                 | 626 |

Positively and negatively influencing subsequences are coloured according to the following scale:

(non-nuclear) negative ||||| positive

## PSORT II

[NUCDISC: discrimination of nuclear localization signals](#)

pat4: RKRK (5) at 37  
pat4: KRRR (5) at 82  
pat7: none  
bipartite: none  
content of basic residues: 11.7%  
NLS Score: 0.15

## SeqNLS

**Prediction result (The predicted NLS(s) are underlined)**

Bma11: MADQRMDISSTISDFMSPGPTD**LLSSSLGTSGVDCN**RKRKGSSTDYQESM****DTDKDDPHGR

## Definition of different colors in predictions

| score range | color                                                                             |
|-------------|-----------------------------------------------------------------------------------|
| 0.1-0.3     |  |
| 0.3-0.5     |  |
| 0.5-0.7     |  |
| 0.7-0.8     |  |
| 0.8-0.86    |  |
| 0.86-0.89   |  |
| >0.89       |  |

## The predicted NLS(s) (score cutoff = 0.5)

| Protein ID | Predicted NLS           | Start | Stop | The highest score of matches within the prediction |
|------------|-------------------------|-------|------|----------------------------------------------------|
| Bmal1      | LLSSSLGTSGVDCNRKRKGSSTD | 23    | 45   | 0.879                                              |

## ELM

TRG\_NLS\_MonoCore\_2      NRKRKG      36-41    Probability 2.345e-04

Monopartite variant of the classical basically charged NLS. Strong core version.

TRG\_NLS\_MonoExtN\_4      RKRKGS      37-42    Probability 1.276e-03

Monopartite variant of the classical basically charged NLS. N-extended version.

No NES positive result

## NES Finder

---

| Position | NES | Type |
|----------|-----|------|
|----------|-----|------|

=====

|     |            |       |
|-----|------------|-------|
| 105 | MSRKLDKLTV | 3-2-1 |
|-----|------------|-------|

|     |            |       |
|-----|------------|-------|
| 108 | KLDKLTVLRM | 2-2-1 |
|-----|------------|-------|

## LocNES

| Protein Name        | Position | Sequence        | Score |
|---------------------|----------|-----------------|-------|
| >LocNES1322284958_0 | 88-102   | RRDKMNSFIDELASL | 0.120 |
| >LocNES1322284958_0 | 104-118  | PTCNAMSRKLDKLTV | 0.565 |
| >LocNES1322284958_0 | 107-121  | NAMSRKLDKLTVLRM | 0.636 |
| >LocNES1322284958_0 | 109-123  | MSRKLDKLTVLRMAV | 0.154 |
| >LocNES1322284958_0 | 112-126  | KLDKLTVLRMAVQHM | 0.048 |
| >LocNES1322284958_0 | 115-129  | KLTVLRMAVQHMCTL | 0.150 |
| >LocNES1322284958_0 | 150-164  | ELKHLILRAADGFLF | 0.021 |
| >LocNES1322284958_0 | 151-165  | LKHLILRAADGFLFV | 0.048 |
| >LocNES1322284958_0 | 152-166  | KHLILRAADGFLFVV | 0.010 |
| >LocNES1322284958_0 | 169-183  | DRGKILFVSESVFKI | 0.006 |
| >LocNES1322284958_0 | 218-232  | APRERLIDAKTGLPV | 0.023 |
| >LocNES1322284958_0 | 325-339  | HSHVVPQPVNGEIRV | 0.014 |
| >LocNES1322284958_0 | 432-446  | TKEVEYIVSTNTVVL | 0.028 |
| >LocNES1322284958_0 | 609-623  | SLLEADAGLGGPVDF | 0.013 |

## NetNES 1.1 Server - prediction results

>Sequence - NetNES 1.1 prediction

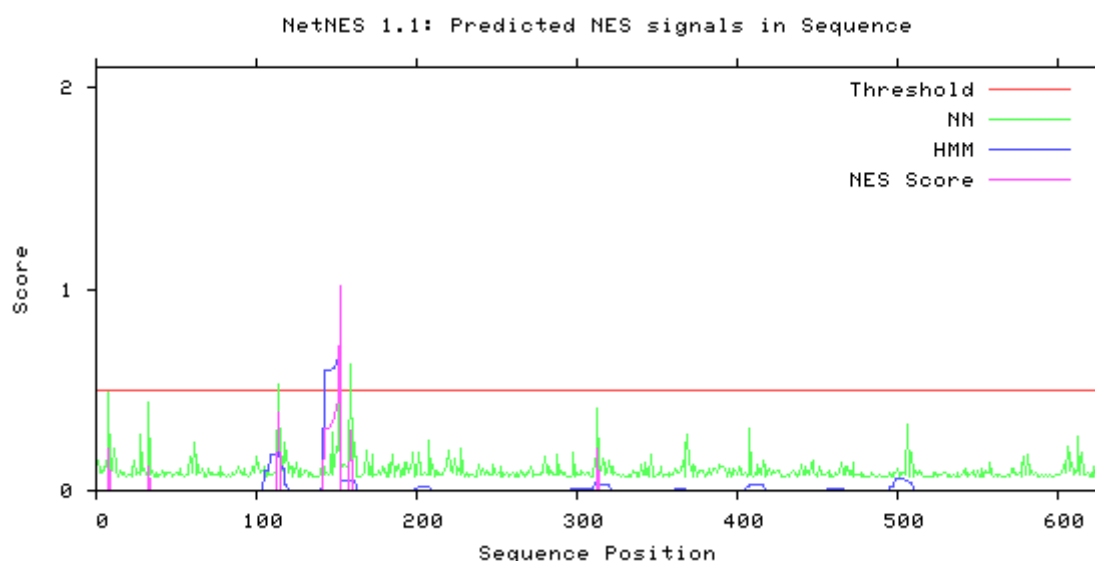

### hBMAL2

```
>sp|Q8WYA1|BMAL2_HUMAN Aryl hydrocarbon receptor nuclear translocator-like
protein 2 OS=Homo sapiens OX=9606 GN=ARNTL2 PE=1 SV=2
MAAEEEEAAAGGKVLREENQCIAPVSSRVSPGTRPTAMGSFSSHMTFFPRKRKGSDDPS
QSGIMTEKVVEKLSQNPLTYLLSTRIEISASSGSRVEDGEHQVKMKAFREAHSQTEKRRR
DKMNNLIEELSAMIPQCNPMARKLDKLTVLRMAVQHLSLKLGTNSYVGSNYRPSFLQDN
ELRHLILKTAEGFLFVVGCERGKILFVSKSVSKILNYDQASLTGQSLFDFLHPKDVAKVK
EQLSSFDISPREKLIDAKTGLQVHSNLHAGRTRVYSGSRRSFFCRIKSKISVKEEHGCL
PNSKKKEHRKFYTIHCTGYLRSWPPNIVGMEEERNSSKKDNSNFTCLVAIGRLQPYIVPQN
SGEINVKPTEFITRFAVNGKFVYVDQRATAILGYLPQELLGTSCYEYFHQDDHNNLTDKH
```

KAVLQSKEKILTDSYKFRAKDGSFVTLKSQWFSFTNPWTKELEYIVSVNTLVLGHSEPGE  
 ASFLPCSSQSSEESSRQSCMSVPGMSTGTVLGAGSIGTDIANEILDQLRLQSSSYLDDSS  
 PTGLMKDTHTVNCRSMSNKELFPPSPSEMGELEATRQNQSTVAVHSHEPLSDGAQLDFD  
 ALCDNDDTAMAAFMNYLEAEGGLGDPGDFSDIQWTL

## cNLS Mapper Result 2.0

### Predicted NLSs in query sequence

|                                                    |                                              |                |     |
|----------------------------------------------------|----------------------------------------------|----------------|-----|
| MAAEEEEAAAGGKVLREENQCIAPVVS                        | SRVSPGTRPTAMGSFSSHMT                         | EFPR           | 50  |
| KRKGS                                              | SDPSQSGIMTEKVVEKLSQNPLTYLLSTRIEISASSGSRVEDGE |                | 100 |
| HQVKMAF                                            | REAHSQTEKRRRDKMNNLIEELSAMI                   | PQCNPMARKLDKLT | 150 |
| RMAVQHL                                            | RLKGLTNSYVGSNYRPSFLQDNELRHLILKTAEGFLFVVGCE   |                | 200 |
| RGKILFVSKSVSKILNYDQASLTGQSLFDFLHPKDVAKVKEQLSSFD    | ISP                                          |                | 250 |
| REKLIDAKTGLQVHSNLHAGRTRVYSGSRRSFFCRIKSKISVKEEHGCL  |                                              |                | 300 |
| PNSKKKEHRKFYTIHCTGYLRSWPPNIVGMEEERN                | SKKDNSNFTCLVAIG                              |                | 350 |
| RLQPYIYPQNSGEINVKPTEFITRFAVNGKFVYVDQRATAILGYLPQELL |                                              |                | 400 |
| GTSCYEYFHQDDHNNLTDKHKAVLQSKEKILTDSYKFRAKDGS        | FVTLKSQ                                      |                | 450 |
| WFSFTNPWTKELEYIVSVNTLVLGHSEPGEASFLPCSSQSSEESSRQSCM |                                              |                | 500 |
| SVPGMSTGTVLGAGSIGTDIANEILDQLRLQSSSYLDDSSPTGLMKDTH  |                                              |                | 550 |
| VNCR                                               | MSNKELFPPSPSEMGELEATRQNQSTVAVHS              | HEPLSDGAQLDFD  | 600 |
| ALCDNDDTAMAAFMNYLEAEGGLGDPGDFSDIQWTL               |                                              |                | 636 |

### Predicted monopartite NLS

| Pos. | Sequence  | Score |
|------|-----------|-------|
| 47   | EFPRKRKGS | 7     |
| 114  | QTEKRRDKM | 6     |

### Predicted bipartite NLS

| Pos. | Sequence                             | Score |
|------|--------------------------------------|-------|
| 27   | SRVSPGTRPTAMGSFSSHMTFPRKRKGS         | 2.3   |
| 47   | EFPRKRKGS DSDPSQSGIMTEKVVEKLSQNP     | 2.2   |
| 47   | EFPRKRKGS DSDPSQSGIMTEKVVEKLS        | 3.3   |
| 47   | EFPRKRKGS DSDPSQSGIMTEKVVEKLSQNP     | 5.5   |
| 47   | EFPRKRKGS DSDPSQSGIMTEKVVEKLSQNP     | 4     |
| 50   | RKRKGS DSDPSQSGIMTEKVVEKLSQNP LTY    | 2.9   |
| 109  | REAHSQTEKRRRD KMNNLIEELSAMI PQCNPMA  | 2.1   |
| 109  | REAHSQTEKRRRD KMNNLIEELSAMI PQCNPMAR | 5.3   |
| 115  | TEKRRRD KMNNLIEELSAMI PQCNPMARKLD    | 2.4   |
| 116  | EKRRRD KMNNLIEELSAMI PQCNPMARKLDK    | 2.8   |
| 116  | EKRRRD KMNNLIEELSAMI PQCNPMARKLD     | 3.3   |
| 118  | RRRD KMNNLIEELSAMI PQCNPMARKLDKLT    | 5.4   |
| 158  | RSLKGLTNSYVGSNYRPSFLQDNELRHLILK      | 2.2   |
| 183  | RHLILKTAEGFLFVVGCE RGKILFVSKSVSKI    | 2.1   |
| 209  | KSVSKILNYDQASLTGQSLDFDLHPKDVAKVK     | 3.7   |
| 235  | DVAKVKEQLSSFDISP REKLIDAKTGLQVHSN    | 2.3   |
| 251  | REKLIDAKTGLQVHSNLHAGRTRVYSGRRSFFC    | 2.2   |
| 271  | RTRVYSGRRSFFCRIKSKISVKEEHGCLPNSKKK   | 2     |
| 279  | RRSFFCRIKSKISVKEEHGCLPNSKKKEHRKFY    | 2.3   |

|     |                                     |     |
|-----|-------------------------------------|-----|
| 279 | RRSFFCRIKSKISVKEEHGCLPNSKKKEHRKFYTI | 3.3 |
| 285 | RIKSKISVKEEHGCLPNSKKKEHRKFYTIHCT    | 2.2 |
| 444 | FVTLKSQWFSFTNPWTKELEYIVSVNTLVLG     | 2.2 |
| 554 | RSMSNKELFPPSPSEMGELEATRQNSTVAVHS    | 2.6 |

## NLStradamus cutoff 0.1

|                 |                                                   |
|-----------------|---------------------------------------------------|
| Posterior @ 0.1 | 35 - PTAMGSFSSHMTEFPRKRKGS DSDPS - 60             |
|                 | 103 - VKMKAFREAHSQTEKRRRDKMNNLI - 127             |
|                 | 285 - RIKSKISVKEEHGCLPNSKKKEHRKFYTIHCTGYLRS - 322 |

## NucPred

The NucPred score for your sequence is 0.85 (see [score help](#) below)

|     |                                                     |     |
|-----|-----------------------------------------------------|-----|
| 1   | MAAEAAAAGGKVLREENQCIAPVSSRVSPGTRPTAMGSFSSHMTEFPR    | 50  |
| 51  | KRKGSDSDPSQSGIMTEKVVEKLSQNPLTYLLSTRIEISASSGSRVEDGE  | 100 |
| 101 | HQVKMKAFREAHSQTEKRRDKMNNLIEELSAMIPOCNPMARKLDKLTVL   | 150 |
| 151 | RMAVQHRLSLKGLTNSYVGSNYRPSFLQDNELRHLILKTAEGFLFVVGCE  | 200 |
| 201 | RGKILFVSKSVSKILNYDQASLTGQSLFDFLHPKDVAKVKEQLSSFDISP  | 250 |
| 251 | REKLIDAKTGLQVHNSNLHAGRTRVYSGSRSSFFCRIKSKISVKEEHGCL  | 300 |
| 301 | PNSKKKEHRKFYTIHCTGYLRSWPPNIVGMEEERNSSKDNSNFTCLVAIG  | 350 |
| 351 | RLQPIYIPQNSGEINVKPTFEITRFVAVNGKFVYVDQRATAILGYLPQELL | 400 |
| 401 | GTSCYEYFHQDDHNNLTDKHKAVLQSKEKILTD SYKFRAKDGSFVTLKSQ | 450 |
| 451 | WFSFTNPWTKELEYIVSVNTLVLGHSEPGEASFLPCSSQSSEESSRQSCM  | 500 |
| 501 | SVPGMSTGTVLGAGSIGTDIANEILDQLQLQSSSYLDDSSPTGLMKDTHT  | 550 |
| 551 | VNCRSMSNKELFPPSPSEMGELEATRQNSTVAVHSHEPLLSDGAQLDFD   | 600 |
| 601 | ALCDNDDTAMAAFMYLEAEGGLGDPGDFSDIQWTL                 | 636 |

Positively and negatively influencing subsequences are coloured according to the following scale:

(non-nuclear) negative ||||| positive (nuclear)

## PSORT II

[NUCDISC: discrimination of nuclear localization signals](#)

```

pat4: PRKR (4) at 49
pat4: RKRK (5) at 50
pat4: KRRR (5) at 117
pat7: PRKRKGS (5) at 49
pat7: PNSKKKE (4) at 301
bipartite: none
content of basic residues: 11.9%
NLS Score: 1.18

```

## SeqNLS

Prediction result (The predicted NLS(s) are underlined)

Bmal2: MAAEEEEAAAGGKVLREENQCIAPVVSSRVSPGTRPTAMGSFSSHMTEFFRKRKGSDSDPS

Definition of different colors in predictions

| score range | color                                                                             |
|-------------|-----------------------------------------------------------------------------------|
| 0.1-0.3     |  |
| 0.3-0.5     |  |
| 0.5-0.7     |  |
| 0.7-0.8     |  |
| 0.8-0.86    |  |
| 0.86-0.89   |  |
| >0.89       |  |

The predicted NLS(s) (score cutoff = 0.5)

| Protein ID | Predicted NLS     | Start | Stop | The highest score of matches within the prediction |
|------------|-------------------|-------|------|----------------------------------------------------|
| Bmal2      | HMTEFFPRKRKGSDSDP | 44    | 59   | 0.895                                              |
| Bmal2      | MAAEEEEAAAG       | 1     | 10   | 0.893                                              |
| Bmal2      | QCIAPVVS          | 19    | 26   | 0.791                                              |

## ELM

**TRG\_NLS\_MonoCore\_2** PRKRKG 49-54 Probability 2.345e-04

Monopartite variant of the classical basically charged NLS. Strong core version.

**TRG\_NLS\_MonoExtC\_3** RKRKGSD 50-56 Probability 7.252e-04

Monopartite variant of the classical basically charged NLS. C-extended version.

**TRG\_NLS\_MonoExtN\_4** 1.276e-03

PRKRKGS 49-55

RKRKGS 50-55

Monopartite variant of the classical basically charged NLS. N-extended version.

**TRG\_NES\_CRM1\_1** 463-477 Probability 7.626e-04

Some proteins re-exported from the nucleus contain a Leucine-rich nuclear export signal (NES) binding to the CRM1 exportin protein.

## NES Finder

Position NES Type

=====

140 MARKLDKLTV 3-2-1



143 KLDKLTVLRM 2-2-1  
239 VKEQLSSFDI 3-2-1

## LocNES

| Protein Name       | Position | Sequence        | Score |
|--------------------|----------|-----------------|-------|
| >LocNES684481929_0 | 38-52    | RPTAMGSFSSHMTEF | 0.041 |
| >LocNES684481929_0 | 78-92    | SQNPLTYLLSTRIEI | 0.075 |
| >LocNES684481929_0 | 123-137  | RRDKMNNLIEELSAM | 0.041 |
| >LocNES684481929_0 | 139-153  | PQCNPMARKLDKLTV | 0.316 |
| >LocNES684481929_0 | 142-156  | NPMARKLDKLTVLRM | 0.614 |
| >LocNES684481929_0 | 144-158  | MARKLDKLTVLRMAV | 0.121 |
| >LocNES684481929_0 | 147-161  | KLDKLTVLRMAVQHL | 0.224 |
| >LocNES684481929_0 | 150-164  | KLTVLRMAVQHLSL  | 0.215 |
| >LocNES684481929_0 | 185-199  | ELRHILKTAEGFLF  | 0.015 |
| >LocNES684481929_0 | 186-200  | LRHLILKTAEGFLFV | 0.036 |
| >LocNES684481929_0 | 187-201  | RHLILKTAEGFLFVV | 0.008 |
| >LocNES684481929_0 | 204-218  | ERGKILFVSKSVSKI | 0.008 |
| >LocNES684481929_0 | 236-250  | HPKDVAKVKEQLSSF | 0.210 |
| >LocNES684481929_0 | 238-252  | KDVAKVKEQLSSFDI | 0.225 |
| >LocNES684481929_0 | 253-267  | SPREKLIDAKTGLQV | 0.036 |
| >LocNES684481929_0 | 367-381  | EINVKPTEFITRFAV | 0.013 |
| >LocNES684481929_0 | 458-472  | FTNPWTKELEYIVSV | 0.069 |
| >LocNES684481929_0 | 463-477  | TKELEYIVSVNTLVL | 0.084 |

## NetNES 1.1 Server - prediction results

---

>Sequence - NetNES 1.1 prediction

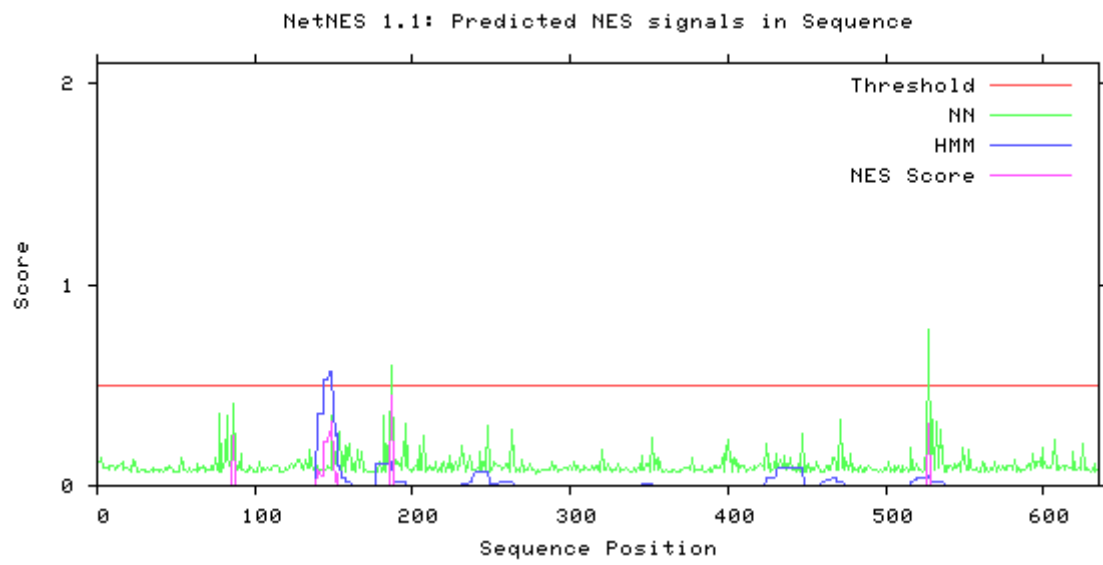

Supplement: s1 [file s1]
