# Supplementary material for: Subcellular Localization Signals of bHLH-PAS Proteins: Their Significance, Current State of Knowledge and Future Perspectives
Source: MDPI journal article supplement (doi:10.3390/ijms20194746), 2019-09-24

# Subcellular Localization Signals of bHLH-PAS Proteins: their Significance, Current State of Knowledge and Future Perspectives

Beata Greb-Markiewicz <sup>1,\*</sup> and Marta Kolonko <sup>1</sup>

## Supplementary Materials Table 1

### Predictors used for NLS prediction:

|             |   |
|-------------|---|
| cNLS Mapper | a |
| NLStradamus | b |
| NucPred     | c |
| PSORT II    | d |
| SeqNLS      | e |
| ELM         | f |

### Predictors used for NES prediction:

|            |   |
|------------|---|
| ELM        | f |
| NES Finder | g |
| NetNES     | h |
| LocNES     | i |

### hAhR

```
>sp|P35869|AHR_HUMAN Aryl hydrocarbon receptor OS=Homo sapiens OX=9606
GN=AHR PE=1 SV=2
MNSSSANITYASRRKRPVQKTVKPIPAEGIKSNPSKRHRDRLNTELDRLASLLPFPQDV
INKLKDLSVLRLSVSYLRAKSFEDVALKSSPTERNGGQDNCRAANFREGNLNQEGEFLLQ
ALNGFVLVVTDALVFYASSTIQDYLGFQQSDVIHQSVYELIHTEDRAEFQRQLHWALNP
SQCTESGQGIEEATGLPQTVVCYNPDQIPPENSPLMERCFCRLRCLLDNSSGFLAMNFQ
GKLKYLHGQKKKGKDGSLPPQLALFAIATPLQPPSILEIRTKNFIFRTKHKLDFTPIGC
DAKGRIVLGYTEAELCTRGSGYQFIHAADMLYCAESHIRMIKTGESGMIVFRLLTKNNRW
TWVQSNARLLYKNGRPDYIIIVTQRPLTDEEGTEHLRKRNTKLPFMFTTGEAVLYEATNPF
PAIMDPLPLRTKNGTSGKDSATTSTLSKDSLNPSSLLAAMMQQDESIYLYPASSTSSTAP
FENNNFNESEMECRNWQDNTAPMGNDTILKHEQIDQPQDVNSFAGGHPGLFQDSKNSDLY
SIMKNLIGIDFEDIRHMQNEKFFRNDFSGEVDFRDIDLTDILTYVQDSLKSPFIPSDYQ
QQQSLALNSSCMVQEHLHLEQQQQHHQKQVVVEPQQQLCQKMKHMVNGMFENWNSNQFV
PFNCPQQDPQQYNVFTDLHGISQEFQYKSEMDSMPYTQNFISCNQPVLPQHSHKCTELDYP
MGSFEPSPYPTTSSLEDFVTCLQLPENQKHGLNPPQSAIITPQTCYAGAVSMYQCQPEPQH
THVGQMQYNPVLPGQQAFLNKFQNGVLNETYPAELNNINNTQTTTHLQPLHHPSEARFPF
DLTSSGFL
```

**cNLS Mapper Results cut-off score 2.0**

| Predicted NLSs in query sequence                    |     |
|-----------------------------------------------------|-----|
| MNSSSANITYASRKRKRPVQKTVKPIPAEGIKSNPSKRHRDRLNTELDRL  | 50  |
| ASLLPFPQDVINKDKLSVLRLSVSYLRAKSFFDVALKSSPTERNGGQDN   | 100 |
| CRAANFREGLNLQEGEFLLQALNGFVLVTTDALVFYASSTIQDYLGFQQ   | 150 |
| SDVIHQSVYELIHTEdraefQRLHWALNPSQCTESGQGIEEATGLPQTV   | 200 |
| VCYNPDQIPPENSPLMERCFICRLRCLLDNSSGFLAMNFQGKLYLHGQK   | 250 |
| KKGKDGSIILPPQALFAIATPLQPPSILEIRTKNFIFRTKHKLDFTPIGC  | 300 |
| DAKGRIVLGYTEAELCTRGSGYQFIHAADMLYCAESHIRMIKTGESGMIV  | 350 |
| FRLLTKNNRWTWVQSNARLLYKNGRPDYIIIVTQRPLTDEEGTEHLRKRNT | 400 |
| KLPFMFTTGEAVLYEATNPFPAIMDPLPLRTKNGTSGKDSATTSTLSKDS  | 450 |
| LNPSLLAAMMQDESIYLYPASSTSSSTAPFENNFNESMNECRNWQDNT    | 500 |
| APMGNDTILKHEQIDQPQDVNSFAGGHPGLFQDSKNSDLYSIMKNLGIDF  | 550 |
| EDIRHMQNEKFFRNDFSGEVDFRDIDLTDEILTYVQDSLKSFPFIPSDYQ  | 600 |
| QQQSLALNSSCMVQEHLHLEQQQQHHQKQVVVEPQQQLCQKMKHMQVNGM  | 650 |
| FENWNSNQFVPFNCPPQDPQQYNVFTDLHGISQEFYKSEMDSMPTQNF    | 700 |
| ISCNQPVLPQHSKCTELDYPMGSFEPSPYPTTSSLEDVFTCLQLPENQKH  | 750 |
| GLNPQSAIITPQTCYAGAVSMYQCQPEPQHTVGMQYNPVLPGQQAFLN    | 800 |
| KFQNGVLNETYPAELNNINNTQTTHLQPLHHPSEARFPDLTSSGFL      | 848 |

| Predicted monopartite NLS |            |       |
|---------------------------|------------|-------|
| Pos.                      | Sequence   | Score |
| 10                        | YASRKRKRPV | 9     |
| 11                        | ASRKRKRPVQ | 11    |

| Predicted bipartite NLS |                                      |       |
|-------------------------|--------------------------------------|-------|
| Pos.                    | Sequence                             | Score |
| 13                      | RKRKRPVQKTVKPIPAEGIKSNPSKRH          | 4.4   |
| 13                      | RKRKRPVQKTVKPIPAEGIKSNPSKRHRD        | 5.4   |
| 13                      | RKRKRPVQKTVKPIPAEGIKSNPSKRHRDR       | 2.4   |
| 13                      | RKRKRPVQKTVKPIPAEGIKSNPSKRHRDR       | 3.4   |
| 13                      | RKRKRPVQKTVKPIPAEGIKSNPSKRHRDR       | 2     |
| 13                      | RKRKRPVQKTVKPIPAEGIKSNPSKRHRDRL      | 3.7   |
| 13                      | RKRKRPVQKTVKPIPAEGIKSNPSKRHRDR       | 3.2   |
| 13                      | RKRKRPVQKTVKPIPAEGIKSNPSKRHRDRLNTELD | 2.3   |
| 34                      | NPSKRHRDRLNTELDRLASLLPFPQDVINK       | 2.9   |
| 34                      | NPSKRHRDRLNTELDRLASLLPFPQDVIN        | 4.9   |
| 37                      | KRHRDRLNTELDRLASLLPFPQDVINKLD        | 2.5   |
| 38                      | RHRDRLNTELDRLASLLPFPQDVINKDKLS       | 2.3   |
| 63                      | KDKLSVLRLSVSYLRAKSFFDVALKSSPTE       | 2     |
| 78                      | RAKSFFDVALKSSPTERNGGQDNCRAANF        | 3     |
| 218                     | RCFICRLRCLLDNSSGFLAMNFQGKLYLHG       | 2     |
| 218                     | RCFICRLRCLLDNSSGFLAMNFQGKLYLHGQK     | 2.2   |
| 239                     | FQGKLYLHGQKKKGKDGSIILPPQALFAI        | 2.2   |
| 241                     | GKLYLHGQKKKGKDGSIILPPQALFAIATP       | 2.1   |
| 248                     | GQKKKGKDGSIILPPQALFAIATPLQPPSI       | 2.3   |
| 250                     | KKKGKDGSIILPPQALFAIATPLQPPSILEI      | 3.1   |
| 279                     | EIRTKNFIFRTKHKLDFTPIGCDAKGRIVLGY     | 2.2   |
| 368                     | RLLYKNGRPDYIIIVTQRPLTDEEGTEHLRKR     | 3.7   |
| 368                     | RLLYKNGRPDYIIIVTQRPLTDEEGTEHLRKRNT   | 3.5   |
| 393                     | EHLRKRNTKLPFMFTTGEAVLYEATNPFPAI      | 3.4   |
| 396                     | RKRNTKLPFMFTTGEAVLYEATNPFPAIMDPLP    | 3     |
| 640                     | QKMKHMQVNGMFENWNSNQFVPFNCPPQD        | 2.7   |

|     |                                  |     |
|-----|----------------------------------|-----|
| 643 | KHMQVNGMFENWNSNQFVFPNCPQQDP      | 2.5 |
| 684 | EFPYKSEMDSMPYTQNFISCNQPVLPQHSKCT | 2.1 |
| 746 | ENQKHGLNPQSAIITPQTCYAGAVSMYQCQP  | 2.9 |

NLStradamus

Cut-off 0.3 4 state static

12 - SRKRRKPVQKTVKPIAEGIKSNPSKRHRDR - 42

247 - HGQKKKGK – 254

NucPred

The NucPred score for your sequence is 0.94 (see [score help](#) below)

|     |                                                     |     |
|-----|-----------------------------------------------------|-----|
| 1   | MNSSSANITYASRKRKPVQKTVKPIAEGIKSNPSKRHRDRINTELDRL    | 50  |
| 51  | ASLLPFPQDVINKLDKLSVLRLSVSYLRAKSFFDVALKSSPTERNGGQDN  | 100 |
| 101 | CRAANFREGLNLQEGEFLQALNGFVLVVTTDALVFYASSTIQDYLGFQQ   | 150 |
| 151 | SDVIHQSVYELIHTEDRAEFQRQLHWALNPSQCTESGGIEEATGLPQTV   | 200 |
| 201 | VCYNPDQIPPENSPLMERCFCRLRCLLDNSSGFLAMNFQGLKYLHGQK    | 250 |
| 251 | KKGKDGSIPLPQALFAIATPLQPPSILEIRTKNFIFRTKHKLDFTPIGC   | 300 |
| 301 | DAKGRIVLGYTEAELCTRGSYQFIHAADMLYCAESHIRMIKTGESGMIV   | 350 |
| 351 | FRLLTKNNRWTWVQSNARLLYKNGRPDYIIIVTQRPLTDEEGTEHLRKRNT | 400 |
| 401 | KLPFMFTTGEAVLYEATNPFPAIMDPLPLRTKNGTSGKDSATTSTLSKDS  | 450 |
| 451 | LNPSSLLAAMMQQDESIYLYPASSTSSTAPFENNFFNESMNECRNWQDNT  | 500 |
| 501 | APMGNDTILKHEQIDQPQDVNSFAGGHPGLFQDSKNSDLYSIMKNLGIDF  | 550 |
| 551 | EDIRHMQNEKFFRNDFSGEVDFRDIDLTDEILTYVQDSLKSPPFIPSDYQ  | 600 |
| 601 | QQQSLALNSSCMVQEHHLHQQQQHHQKQVVVEPQQQLCQMKHMQVNGM    | 650 |
| 651 | FENWNSNQFVFPNCPQQDPQQYNVFTDLHGISOEFQPYKSEMDSMPYTQNF | 700 |
| 701 | ISCNQPVLPQHSKCTELDYPMGSFEPSPYPTTSSLEDFTVCLQLPENQKH  | 750 |
| 751 | GLNPQSAIITPQTCYAGAVSMYQCQPEPQHTHVGMQYNPVLPGQQAFLN   | 800 |
| 801 | KFQNGVLNETYPAELNNINNTQTTTHLQPLHHPSEARFPDLTSSGFL     | 848 |

Positively and negatively influencing subsequences are coloured according to the following scale:

(non-nuclear) negative ||||| positive (nuclear)

PSORTII

[NUCDISC: discrimination of nuclear localization signals](#)

pat4: RKRR (5) at 13  
pat4: KRRK (5) at 14  
pat4: RRKP (4) at 15  
pat4: KRHR (3) at 37  
pat7: PSKRHRD (4) at 35  
bipartite: none  
content of basic residues: 8.8%  
NLS Score: 0.94

SeqNLS

Prediction result (The predicted NLS(s) are underlined)

AhR: MNSSSANITYASRKRKPVQKTVKPIAEGIKSNPSKRHRDRINTELDRLASLLPFPQDV

## Definition of different colors in predictions

| score range | color                                                                             |
|-------------|-----------------------------------------------------------------------------------|
| 0.1-0.3     |  |
| 0.3-0.5     |  |
| 0.5-0.7     |  |
| 0.7-0.8     |  |
| 0.8-0.86    |  |
| 0.86-0.89   |  |
| >0.89       |  |

The predicted NLS(s) (score cutoff = 0.5)

| Protein ID | Predicted NLS     | Start | Stop | The highest score of matches within the prediction |
|------------|-------------------|-------|------|----------------------------------------------------|
| AhR        | ASRKRRKPVQKTVK    | 11    | 24   | 0.887                                              |
| AhR        | PAEGIKSNPSKRHRDRL | 27    | 43   | 0.886                                              |

## ELM

Motif Probability Cutoff:100

**TRG\_NLS\_MonoCore\_2** 2.345e-04

SRKRRK 12-17

RKRRKP 13-18

Monopartite variant of the classical basically charged NLS. Strong core version.

**TRG\_NLS\_MonoExtC\_3** 7.252e-04

SRKRRK 12-17

RKRRKP 13-18

QKKKGK 249-254

Monopartite variant of the classical basically charged NLS. C-extended version.

**TRG\_NLS\_MonoExtN\_4** 1.276e-03

RKRRKP 13-18

Monopartite variant of the classical basically charged NLS. N-extended version.

TRG\_NES\_CRM1\_1 7.626e-04

DLYSIMKNLGIDFED 538-552

## NES Finder

Position NES Type

=====

|     |            |       |
|-----|------------|-------|
| 47  | LDRLASLLPF | 2-3-1 |
| 60  | VINKLDKLSV | 3-2-1 |
| 63  | KLDKLSVLRL | 2-2-1 |
| 259 | LPPQLALFAI | 3-2-1 |
| 420 | FPAIMDPLPL | 3-2-1 |
| 539 | LYSIMKNLGI | 3-2-1 |
| 735 | LEDFVTCLQL | 3-2-1 |

## LocNES

| Protein Name        | Position | Sequence         | Score |
|---------------------|----------|------------------|-------|
| >LocNES1759629158_0 | 46-60    | RLNTELDRLASLLPF  | 0.394 |
| >LocNES1759629158_0 | 59-73    | PFPQDVINKLDKLSV  | 0.746 |
| >LocNES1759629158_0 | 62-76    | QDVINKLDKLSVLRL  | 0.658 |
| >LocNES1759629158_0 | 64-78    | VINKLDKLSVLRLSV  | 0.444 |
| >LocNES1759629158_0 | 67-81    | KLDKLSVLRLSVSYL  | 0.452 |
| >LocNES1759629158_0 | 77-91    | SVSYLRAKSFFDVAL  | 0.026 |
| >LocNES1759629158_0 | 102-116  | QDNCRAANFREGNL   | 0.043 |
| >LocNES1759629158_0 | 117-131  | QEGEFLLQALNGFVL  | 0.053 |
| >LocNES1759629158_0 | 118-132  | EGEFLLQALNGFVLV  | 0.081 |
| >LocNES1759629158_0 | 119-133  | GEFLLQALNGFVLVV  | 0.055 |
| >LocNES1759629158_0 | 126-140  | LNGFVLVVTTDALVF  | 0.043 |
| >LocNES1759629158_0 | 138-152  | LVFYASSTIQDYLG   | 0.015 |
| >LocNES1759629158_0 | 236-250  | SGFLAMNFQGKLKYL  | 0.045 |
| >LocNES1759629158_0 | 258-272  | KDGSILPPQLALFAI  | 0.138 |
| >LocNES1759629158_0 | 277-291  | QPPSILEIRTKNFIF  | 0.013 |
| >LocNES1759629158_0 | 285-299  | RTKNFIFRTKHKLDF  | 0.017 |
| >LocNES1759629158_0 | 298-312  | DFTPIGCDAGKRVIL  | 0.027 |
| >LocNES1759629158_0 | 330-344  | HAADMPLYCAESHIRM | 0.013 |

|                     |         |                  |       |
|---------------------|---------|------------------|-------|
| >LocNES1759629158_0 | 331-345 | AADMLYCAESHIRMI  | 0.022 |
| >LocNES1759629158_0 | 413-427 | GEAVLYEATNPFPPI  | 0.021 |
| >LocNES1759629158_0 | 417-431 | LYEATNPFPPIAIDPL | 0.118 |
| >LocNES1759629158_0 | 419-433 | EATNPFPPIAIDPLPL | 0.083 |
| >LocNES1759629158_0 | 538-552 | SKNSDLYSIMKNLGI  | 0.070 |
| >LocNES1759629158_0 | 543-557 | LYSIMKNLGIDFEDI  | 0.043 |
| >LocNES1759629158_0 | 562-576 | NEKFFRNDFSGEVDF  | 0.005 |
| >LocNES1759629158_0 | 567-581 | RNDFSGEVDFRDIDL  | 0.020 |
| >LocNES1759629158_0 | 575-589 | DFRDIDLTDEILTYV  | 0.029 |
| >LocNES1759629158_0 | 637-651 | EPQQQLCQKMKHMQV  | 0.026 |
| >LocNES1759629158_0 | 732-746 | PYPTTSSLEDFTCL   | 0.174 |
| >LocNES1759629158_0 | 734-748 | PTTSSLEDFTCLQL   | 0.128 |

## NetNES 1.1 Server prediction results

>Sequence - NetNES 1.1 prediction

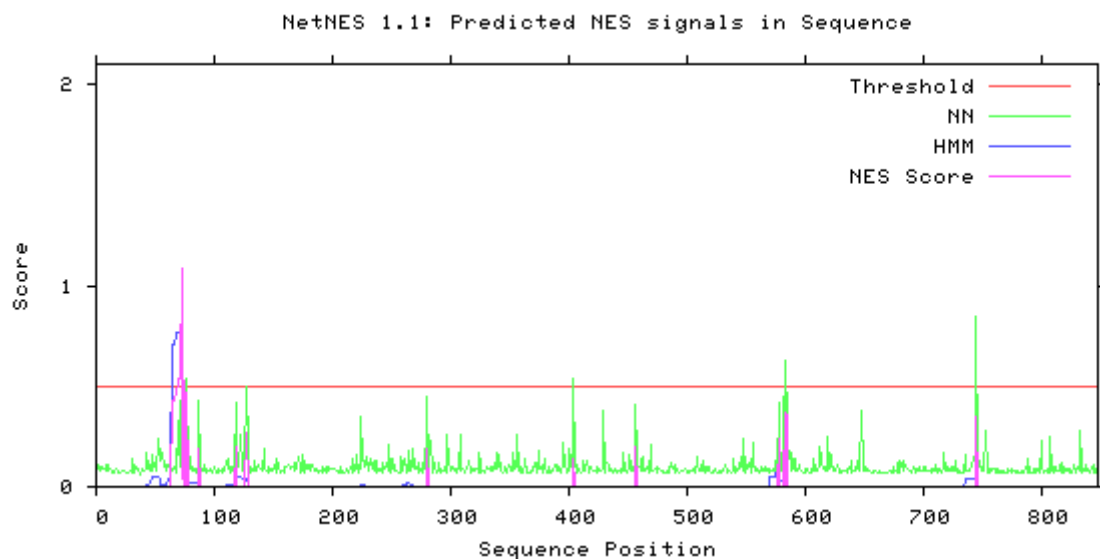

### hHIF1 $\alpha$

>sp|Q16665|HIF1A\_HUMAN Hypoxia-inducible factor 1-alpha OS=Homo sapiens  
OX=9606 GN=HIF1A PE=1 SV=1  
MEGAGGANDKKKISSERRKEKSRDAARSRRSKESEVFYELAHQLPLPHNVSSHLDKASVM

RLTISYLRVRKLLDAGDLIEDDMKAQMNCFYLKALDGFVMVLTDDGDMIIYISDNVNKYM  
 GLTQFELTGHSVDFDTHPCDHEEMREMLTHRNGLVKKGKEQNTQRSFFLRMKCTLTSRGR  
 TMNIKSATWKVLHCTGHIHVYDTNSNQPCGYKKPPMTCLVLICEPIPHPSNIEIPLDSK  
 TFLSRHSLDMKFSYCDERITELMGYEPEELLGRSIIYEYHALDSHDLTKTHHDMFTKGQV  
 TTGQYRMLAKRGYVWVETQATVIYNTKNSQPQCIVCVNYVVGIIQHDLIIFSLQQTECV  
 LKPVESDMKMTQLFTKVESEDTSFLFDKLKKEPDALTLLAPAAGDTIISLDFGSNDTET  
 DDQOLEEVPLYNDVMLPSPNEKLQNINLAMSPLETAETPKPLRSSADPALNQEVALKLEP  
 NPESLELSFTMPQIQDQTPSPSDGSTRQSSPEPNPSEYCFYVDSMDVNEFKLELVEKLF  
 AEDTEAKNPFSTQDLDLEMLAPYIPMDDDFQLRSFDQLSPLESSSASPESASPQSTVT  
 VFQQTQIQEPTANATTTTATTDDELKTVTKDRMEDIKILIASPSPTHHKETTSATSSPYR  
 DTQSRTASPNRAGKVIEQTEKSHPRSPNVLSVALSQRTTVPEEELNPKILALQNAQRKR  
 KMEHDGSLFQAVGIGTLLQQPDDHAATTSLSWKRVKGCKSSEQNGMEQKTIILIPSDLAC  
 RLLGQSMDESGLPQLTSYDCEVNAPIQGSRNLLQGEELLRALDQVN

## cNLS Mapper Result cut-off score 2.0

| Predicted NLSs in query sequence                    |     |
|-----------------------------------------------------|-----|
| MEGAGGANDKKKISSERRKEKSRDAARSRRSKESEVFYELAHQLPLPHNV  | 50  |
| SSHLDKASVMRLTISYLRVRKLLDAGDLIEDDMKAQMNCFYLKALDGFV   | 100 |
| MVLTDDGDMIIYISDNVNKYMGLTQFELTGHSVDFDTHPCDHEEMREMLTH | 150 |
| RNGLVKKGKEQNTQRSFFLRMKCTLTSRGRTMNIKSATWKVLHCTGHIHV  | 200 |
| YDTNSNQPCGYKKPPMTCLVLICEPIPHPSNIEIPLDSKTFLSRHSLDM   | 250 |
| KFSYCDERITELMGYEPEELLGRSIIYEYHALDSHDLTKTHHDMFTKGQV  | 300 |
| TTGQYRMLAKRGYVWVETQATVIYNTKNSQPQCIVCVNYVVGIIQHDLI   | 350 |
| IFSLQQTECVLKPVESDMKMTQLFTKVESEDTSFLFDKLKKEPDALTLL   | 400 |
| APAAGDTIISLDFGSNDTETDDQOLEEVPLYNDVMLPSPNEKLQNINLAM  | 450 |
| SPLPTAETPKPLRSSADPALNQEVALKLEPNPESLELSFTMPQIQDQTPS  | 500 |
| PSDGSTRQSSPEPNPSEYCFYVDSMDVNEFKLELVEKLFADTEAKNPF    | 550 |
| STQDLDLEMLAPYIPMDDDFQLRSFDQLSPLESSSASPESASPQSTVT    | 600 |
| VFQQTQIQEPTANATTTTATTDDELKTVTKDRMEDIKILIASPSPTHIHKE | 650 |
| TTSATSSPYRDTQSRTASPNRAGKVIEQTEKSHPRSPNVLSVALSQRTT   | 700 |
| VPEEELNPKILALQNAQRKRKMEHDGSLFQAVGIGTLLQQPDDHAATTSL  | 750 |
| SWKRVKGCKSSEQNGMEQKTIILIPSDLACRLLGQSMDESGLPQLTSYDC  | 800 |
| EVNAPIQGSRNLLQGEELLRALDQVN                          | 826 |

### Predicted monopartite NLS

| Pos. | Sequence   | Score |
|------|------------|-------|
| 716  | AQRKRKMEHD | 8     |

### Predicted bipartite NLS

| Pos. | Sequence                           | Score |
|------|------------------------------------|-------|
| 8    | NDKKKISSERRKEKSRDAARSRRSKESEV      | 2.6   |
| 23   | RDAARSRRSKESEVFYELAHQLPLPHNVSSHLDK | 2.4   |
| 68   | RVRKLLDAGDLIEDDMKAQMNCFYLKALD      | 2.6   |
| 68   | RVRKLLDAGDLIEDDMKAQMNCFYLKALD      | 2.9   |
| 189  | WKVLHCTGHIHVYDTNSNQPCGYKKPP        | 2.6   |
| 211  | GYKKPPMTCLVLICEPIPHPSNIEIPLDSKT    | 2.1   |

|     |                                     |     |
|-----|-------------------------------------|-----|
| 245 | RHSLDMKFSYCDERITELMGYEPEELLGRSIY EY | 2.8 |
| 285 | DHLTKTHHDMFTKGQVTTGQYRMLAKRGGY      | 2.3 |
| 303 | GQYRMLAKRGGYVWVETQATVIYNTKNSQP      | 2.4 |
| 306 | RMLAKRGGYVWVETQATVIYNTKNSQPQCIV     | 2.3 |
| 365 | ESSDMKMTQLFTKVESEDTS S LFDK LKKEPDA | 2.7 |
| 647 | IHKETTSATSSPYRDTQSRTASPNRAGKG       | 2.4 |
| 697 | QRTTVPEEELNPKILALQNAQRKRKME         | 2.6 |
| 697 | QRTTVPEEELNPKILALQNAQRKRKMEHD       | 2.7 |
| 717 | QRKRKMEHDGSLFQAVGIGTLLQQPDDHA       | 3.2 |

## NLStradamus

cutoff 0.1 4 state HMM

3 - GAGGANDKKKISSERRKEKSRDAARSRRSKESEVFYELA - 41

155 - VKKGKE - 160

709 - KILALQNAQRKRKME – 723

## NucPred

The NucPred score for your sequence is 0.94 (see [score help](#) below)

|     |                                                       |     |
|-----|-------------------------------------------------------|-----|
| 1   | MEGAGGANDKKKISSERRKEKSRDAARSRRSKESEVFYELAHQLPLPHNV    | 50  |
| 51  | SSHLDKASVMRLTISYLRVRKLLDAGDLIEDDMKAQMNC FYLKALDGFV    | 100 |
| 101 | MVLTDGDGMIYISDNVNKYMGLTQFELTGHSVFDFTHPCDHEEMREMLTH    | 150 |
| 151 | RNGLVKKGKEQNTQRSFFLRMKCTLT SRGRTMNIKSATWKVLHCTGHIHV   | 200 |
| 201 | YDTNSNQPCGYKKPPMTCLVLICEPIPHPSNIEIPLDSKTFLSRHS LDM    | 250 |
| 251 | KFSYCDERITELMGYEPEELLGRSIYEYYHALDSHLTKTHHDMFTKGQV     | 300 |
| 301 | TTGQYRMLAKRGGYVWVETQATVIYNTKNSQPQCIVCVNYVVS GIIQHDL   | 350 |
| 351 | IFSLQOTECVLKPVESSDMKMTQLFTKVESEDTS S LFDK LKKEPDALTLL | 400 |
| 401 | APAAGDTIISLDFGSNDTETDDQOLEEVPLYNDVMLPSPNEKLQINLAM     | 450 |
| 451 | SPLPTAETPKPLRSSADPALNQEVALKLEPNPESLELSFTMPQIQDQTPS    | 500 |
| 501 | PSDGSTRQSSPEPNPSEYCFYVDSDMVNEFKLELVEKLFAEDTEAKNPF     | 550 |
| 551 | STQDTDLDLEMLAPYIPMDDDFQLRSFDQLSPLESSSASPESASPQSTVT    | 600 |
| 601 | VFQQTQIQEPTANATTTTATTDDELKTVTKDRMEDIKILIASPSPTHIHK    | 650 |
| 651 | TTSATSSPYRDTQSRTASPNRAGKGVIEQTEKSHPRSPNVLSVALS QRTT   | 700 |
| 701 | VPEEELNPKILALQNAQRKRKMEHDGSLFQAVGIGTLLQQPDDHAATTSL    | 750 |
| 751 | SWKRVKGCKSSEQNGMEQKTIILIPSDLACRLLGQSMDESGLPQLTSYDC    | 800 |
| 801 | EVNAPIQGSRNLLQGEELLRALDQVN                            | 826 |

Positively and negatively influencing subsequences are coloured according to the following scale:

(non-nuclear) negative ||||| positive (nuclear)



## PSORTII

[NUCDISC: discrimination of nuclear localization signals](#)

pat4: RKRK (5) at 718  
pat7: none  
bipartite: RRKEKSRDAARSRRSKE at 17  
content of basic residues: 10.3%  
NLS Score: 0.33

## SeqNLS

**Prediction result (The predicted NLS(s) are underlined)**

Hif1a: MEGAGGANDKKKISSERRKEKSRDAARSRRSKESEVFYELAHQQLPLPHNVSSHLDKASVM

**The predicted NLS(s) (score cutoff = 0.5)**

| Protein ID | Predicted NLS            | Start | Stop | The highest score of matches within the prediction |
|------------|--------------------------|-------|------|----------------------------------------------------|
| Hif1a      | KKKISSERRKEKSRDAARSRRSKE | 10    | 33   | 0.964                                              |
| Hif1a      | SVM                      | 58    | 60   | 0.696                                              |
| Hif1a      | SEVFYE                   | 34    | 39   | 0.568                                              |

## ELM

**TRG\_NLS\_MonoCore\_2** 2.345e-04

QRKRKM 717-722

Monopartite variant of the classical basically charged NLS. Strong core version.

**TRG\_NLS\_MonoExtC\_3** 7.252e-04

QRKRKME 717-723

Monopartite variant of the classical basically charged NLS. C-extended version.

**TRG\_NES\_CRM1\_1** 7.626e-04

DDMKAQMNCFYLKALD 82-97 ;

DMKAQMNCFYLKALD 83-97

Some proteins re-exported from the nucleus contain a Leucine-rich nuclear export signal (NES) binding to the CRM1 exportin protein.

## NES Finder

Position NES Type

=====

37 FYELAHQLPL 2-3-1  
60 MRLTISYLRV 3-2-1  
84 MKAQMNC FYL 3-2-1  
559 LEM LAPYIPM 2-3-1

## LocNES

| Protein Name       | Position | Sequence         | Score |
|--------------------|----------|------------------|-------|
| >LocNES223789098_0 | 36-50    | KESEV FYELAHQLPL | 0.072 |
| >LocNES223789098_0 | 52-66    | HNVSSHLDKASVMRL  | 0.122 |
| >LocNES223789098_0 | 54-68    | VSSHLDKASVMRLTI  | 0.026 |
| >LocNES223789098_0 | 57-71    | HLDKASVMRLTISYL  | 0.090 |
| >LocNES223789098_0 | 59-73    | DKASVMRLTISYLRV  | 0.110 |
| >LocNES223789098_0 | 70-84    | YLRVRKLLDAGDLDI  | 0.103 |
| >LocNES223789098_0 | 83-97    | DIEDDMKAQMNC FYL | 0.046 |
| >LocNES223789098_0 | 91-105   | QMNC FYLKALDGFVM | 0.022 |
| >LocNES223789098_0 | 92-106   | MNC FYLKALDGFVMV | 0.012 |
| >LocNES223789098_0 | 93-107   | NCFY LKALDGFVMVL | 0.011 |
| >LocNES223789098_0 | 112-126  | DMYISDNVN KYMGL  | 0.035 |
| >LocNES223789098_0 | 117-131  | SDNVN KYMGLTQFEL | 0.027 |
| >LocNES223789098_0 | 125-139  | GLTQFELTGHSV FDF | 0.009 |
| >LocNES223789098_0 | 190-204  | SATWKVLHCTGHIHV  | 0.011 |
| >LocNES223789098_0 | 335-349  | QPQCIVCVNYV VSGI | 0.019 |
| >LocNES223789098_0 | 342-356  | VNYV VSGIIQHDLIF | 0.066 |
| >LocNES223789098_0 | 354-368  | LIFSLQQTECVLKPV  | 0.012 |
| >LocNES223789098_0 | 403-417  | LLAPAAGDTIISLDF  | 0.028 |
| >LocNES223789098_0 | 443-457  | PNEKLQNINLAMSPL  | 0.284 |
| >LocNES223789098_0 | 466-480  | LRSSADPALNQEVAL  | 0.114 |
| >LocNES223789098_0 | 523-537  | YCFYVDS DMVNEFKL | 0.065 |
| >LocNES223789098_0 | 558-572  | DTDLDLEMLAPYIPM  | 0.190 |
| >LocNES223789098_0 | 627-641  | ELKTVTKDRMEDIKI  | 0.365 |

## NetNES 1.1 Server - prediction results

>sp\_Q16665\_HIF1A\_HUMAN - NetNES 1.1 prediction

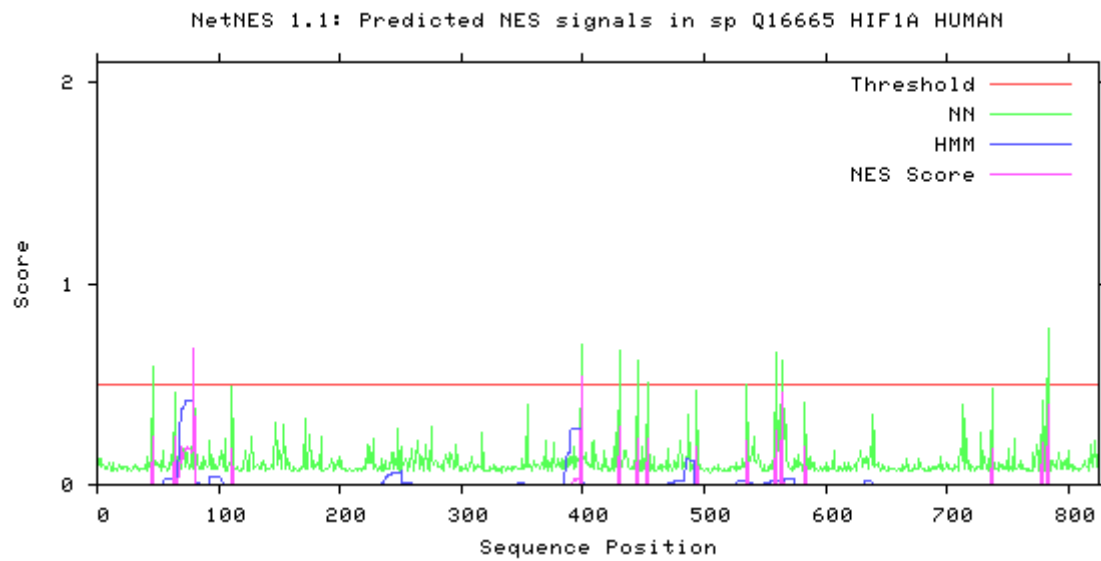

#

### hHIF2 $\alpha$

>sp|Q99814|EPAS1\_HUMAN Endothelial PAS domain-containing protein 1 OS=Homo sapiens OX=9606 GN=EPAS1 PE=1 SV=3

MTADKEKKRSSSERRKEKSRDAARCRRSKETEVFYELAHELPLPHSVSSHLDKASIMRLA  
ISFLRTHKLLSSVCSENESEAEADQQMDNLYLKALEGFIAVVTQDGMIFLSENISKFMG  
LTQVELTGHSIFDFTHPCDHEEIARENLSLKNGSGFGKKSKDMSTERDFFMRMKCTVTNRG

RTVNLKSATWKVLHCTGQVKVYNNCPPHNSLCGYKEPLLSCLIIMCEPIQHPSHMDIPLD  
 SKTFLSRHSMDFKTYCDDRITELIGYHPEELLGRSAYEFYHALDSENMTKSHQNLCTKG  
 QVVSGQYRMLAKHGGYVWLETQGTVIYNPNRLQPQCIMCVNYVLSEIEKNDVVFSDMQTE  
 SLFKPHLMAMNSIFDSSGKGAVSEKSNFLFTKLKEEPEELAQLAPTQDAIISLDFGNQN  
 FEESAYGKAILPPSQPWATELRSHSTQSEAGSLPAFTVPQAAAPGSTTPSATSSSSSSCS  
 TPNSPEDYYTSLDNDLKIEVIEKLFAMDTEAKDQCSTQTDNFELDLETLAPYIPMDGEDF  
 QLSPICPEERLLAENPQSTPQHCFSAMTNIFQPLAPVAPHSPFLLDKFQQQLESKKTEPE  
 HRPMSIIFFDAGSKASLPCCGQASTPLSSMGGRSNTQWPPDPPLHFGPTKWAVGDQORTE  
 FLGAAPLGPPVSPPHVSTFKTRSAKGFGARGPDVLSAMVALSNKLKLRQLEYEEQAFQ  
 DLSSGDPGGSTSHLMWKRMLNLRGGSCPLMPDKPLSANVPNDKFTQNPGRGLGHLRHL  
 PLPQPPSAISPGENSKSRFPQCYATQYQDYSLSSAHKVSQMASRLLGPSFESYLLPELT  
 RYDCEVNPVVLGSSTLLQGGDLLRALDQAT

## cNLS Mapper Result cut-off score 2.0

| Predicted NLSs in query sequence                    |     |
|-----------------------------------------------------|-----|
| MTADKEKKRSSSERRKEKSRDAARCRRSKETE VFYELAHPLPHSVSSH   | 50  |
| LDKASIMRLAISFLRTHKLLSSVCSENESEAEADQQMDNLYLKALEGFIA  | 100 |
| VVTQDGDIMIFLSENISKFMGLTQVELTGHSIFDFTHPDHEEI RENLSLK | 150 |
| NGSGFGKKSKDMSTERDFFMRMKCTVTNRGRTVNLKSATWKVLHCTGQVK  | 200 |
| VYNNCPPHNSLCGYKEPLLSCLIIMCEPIQHPSHMDIPLD SKTFLSRHSM | 250 |
| DMKFTYCDDRITELIGYHPEELLGRSAYEFYHALDSENMTKSHQNLCTKG  | 300 |
| QVVSGQYRMLAKHGGYVWLETQGTVIYNPNRLQPQCIMCVNYVLSEIEKN  | 350 |
| DVVFSDMQTESLFKPHLMAMNSIFDSSGKGAVSEKSNFLFTKLKEEPEEL  | 400 |
| AQLAPTQDAIISLDFGNQNFEESSAYGKAILPPSQPWATELRSHSTQSE   | 450 |
| AGSLPAFTVPQAAAPGSTTPSATSSSSSCSTPNSPEDYYTSLDNDLKIEV  | 500 |
| IEKLFAMDTEAKDQCSTQTDNFELDLETLAPYIPMDGEDFQLSPICPEER  | 550 |
| LLAENPQSTPQHCFSAMTNIFQPLAPVAPHSPFLLDKFQQQLESKKTEPE  | 600 |
| HRPMSSIIFFDAGSKASLPCCGQASTPLSSMGGRSNTQWPPDPPLHFGPT  | 650 |
| KWAVGDQORTEFLGAAPLGPPVSPPHVSTFKTRSAKGFGARGPDVLSAMV  | 700 |
| ALSNKLKLRQLEYEEQAFQDLSSGDPGGSTSHLMWKRMLNLRGGSCPL    | 750 |
| MPDKPLSANVPNDKFTQNPGRGLGHLRHLPLPQPPSAISPGENSKSRFP   | 800 |
| PQCYATQYQDYSLSSAHKVSQMASRLLGPSFESYLLPELTRYDCEVNPV   | 850 |
| LGSSTLLQGGDLLRALDQAT                                | 870 |

### Predicted monopartite NLS

| Pos. | Sequence | Score |
|------|----------|-------|
|      |          |       |

### Predicted bipartite NLS

| Pos. | Sequence                           | Score |
|------|------------------------------------|-------|
| 3    | ADKEKKRSSSERRKEKSRDAARCRRSKETE     | 2     |
| 5    | KEKKRSSSERRKEKSRDAARCRRSKETE V     | 2.5   |
| 6    | EKKRSSSERRKEKSRDAARCRRSKETE V      | 2.1   |
| 20   | RDAARCRRSKETE VFYELAHPLPHSVSSH     | 2     |
| 20   | RDAARCRRSKETE VFYELAHPLPHSVSSH LDK | 2.6   |
| 24   | RCRRSKETE VFYELAHPLPHSVSSH LDKASI  | 2     |
| 65   | RTHKLLSSVCSENESEAEADQQMDNLYLKA     | 3.8   |
| 144  | RENLSLKNGSGFGKKSKDMSTERDFFMRMKCT   | 2.2   |

|     |                                    |     |
|-----|------------------------------------|-----|
| 144 | RENLSLKNGSGFGKKSKDMSTERDFFMRMKCTVT | 2.9 |
| 179 | RGRTVNLKSATWKVLHCTGQVKVYNNCPPHNSLC | 2.2 |
| 197 | GQVKVYNNCPPHNSLCGYKEPLLSCLIIMCE    | 2.5 |
| 247 | RHSMDMKFTYCDRITELIGYHPEELLGRSAYE   | 2.3 |
| 360 | ESLFKPHLMAMNSIFDSSGKGAVSEKSNFLEF   | 2   |
| 610 | DAGSKASLPPCCGQASTPLSSMGGRSNTQWPP   | 2.4 |
| 682 | RSAGFGARGPDVLS PAMVALSNKLKLKR      | 4.1 |
| 704 | NKLKLKRQLEYEEQAFQDLSSGDPGGST       | 2.6 |
| 705 | KLKLKRQLEYEEQAFQDLSSGDPGGSTSH      | 4.2 |
| 705 | KLKLKRQLEYEEQAFQDLSSGDPGGSTSHL     | 5.4 |
| 737 | WKRMKNLRGGSCPLMPDKPLSANVPNDKFT     | 3.2 |
| 752 | PDKPLSANVPNDKFTQNPMRGLGHPLRHL      | 2.5 |
| 793 | ENSKSRFPQCYATQYQDYSLSAHSVSGM       | 4   |
| 817 | HKVSGMASRLLGPSFESYLLPELTRYDCE      | 3.2 |

## NLStradamus

0.1 cut-off 4 state HMM static

3 - ADKEKKRSSERRKEKSRDAARCRRSKETEV - 33

156 - GKKS - 160

680 - KTRSAKFGARGPDVLS PAMVALSNKLKLKR - 710

738 - KRMK - 741

## NucPred

The NucPred score for your sequence is 0.86 (see [score help](#) below)

|     |                                                    |     |
|-----|----------------------------------------------------|-----|
| 1   | MTADKEKKRSSERRKEKSRDAARCRRSKETEVFYELAHELPLPHSVSSH  | 50  |
| 51  | LDKASIMRLAISFLRTHKLLSSVCSENESEAEADQOMDNLKALEGFIA   | 100 |
| 101 | VVTQDGMIFLSENISKFMGLTQVELTGHSIFDFTHPCDHEEIRENLSLK  | 150 |
| 151 | NGSGFGKKSKDMSTERDFFMRMKCTVTNRGRTVNLKSATWKVLHCTGQVK | 200 |
| 201 | VYNNCPPHNSLCGYKEPLLSCLIIMCEPIQHPSHMDIPLDSKTFLSRHSM | 250 |
| 251 | DMKFTYCDRITELIGYHPEELLGRSAYEFYHALDSENMTKSHQNLCTKG  | 300 |
| 301 | QVVSQYRMLAKHGGYVWLETQGTVIYNPRNLQPQCIMCVNYVLSEIEKN  | 350 |
| 351 | DVVFSMDQTESLFKPHLMAMNSIFDSSGKGAVSEKSNFLFTKLKEEPEEL | 400 |
| 401 | AQLAPTPGDAIISLDFGNQNFEESSAYGKAILPPSQPWATELRSHSTQSE | 450 |
| 451 | AGSLPAFTVPQAAAPGSTTPSATSSSSSCSTPNSPEDYYTSLDNDLKIEV | 500 |
| 501 | IEKLFAMDTEAKDQCSTQTDNFELDLETLAPYIPMDGEDFQLSPICPEER | 550 |
| 551 | LLAENPQSTPQHCFSAMTNIFQPLAPVAPHSPFLLDKFQQQLESKKTEPE | 600 |
| 601 | HRPMSSIFFDAGSKASLPPCCGQASTPLSSMGGRSNTQWPPDPPLHFGPT | 650 |
| 651 | KWAVGDQRTFELGAAPLGPVSPPHVSTFKTRSAKFGARGPDVLS PAMV  | 700 |
| 701 | ALSNKLKLKRQLEYEEQAFQDLSSGDPGGSTSHLMWKRMKNLRGGSCPL  | 750 |
| 751 | MPDKPLSANVPNDKFTQNPMRGLGHPLRHLPLQPPSAISPGENSKSRFP  | 800 |
| 801 | PQCYATQYQDYSLSAHSVSGMASRLLGPSFESYLLPELTRYDCEVNPV   | 850 |
| 851 | LGSSTLLQGGDLLRALDQAT                               | 870 |

Positively and negatively influencing subsequences are coloured according to the following scale:

(non-nuclear) negative ||||| positive (nuclear)

## PSORTII

[NUCDISC: discrimination of nuclear localization signals](#)

```
pat4: none
pat7: none
bipartite: RRKEKSRDAARCRRSKE at 14
content of basic residues: 9.8%
NLS Score: 0.02
```

## Seq NLS

**Prediction result (The predicted NLS(s) are underlined)**

Hif2a: MTADKEKKRSSSERRKEKSRDAARCRRSKETEVFYELAHELPLPHSVSSHLDKASIMRLA

**The predicted NLS(s) (score cutoff = 0.5)**

| Protein ID | Predicted NLS           | Start | Stop | The highest score of matches within the prediction |
|------------|-------------------------|-------|------|----------------------------------------------------|
| Hif2a      | KRSSSERRKEKSRDAARCRRSKE | 8     | 30   | 0.916                                              |
| Hif2a      | FYELAHE                 | 34    | 40   | 0.844                                              |

## ELM

Motif Probability Cutoff:100 No NLS and NES positive result

## NES Finder

Position NES Type

=====

```
34  FYELAHELPL 2-3-1
92  LKALEGFIIV 2-3-1
498 IEVIEKLFAM 2-3-1
526 LETLAPYIPM 2-3-1
699 MVALSNKCLKL 2-3-1
773 LGHPLRHLPL 3-2-1
```

## LocNES

| Protein Name        | Position | Sequence        | Score |
|---------------------|----------|-----------------|-------|
| >LocNES1396965342_0 | 33-47    | KETEVFYELAHELPL | 0.135 |
| >LocNES1396965342_0 | 49-63    | HSVSSHLDKASIMRL | 0.190 |
| >LocNES1396965342_0 | 51-65    | VSSHLDKASIMRLAI | 0.078 |

|                     |         |                  |       |
|---------------------|---------|------------------|-------|
| >LocNES1396965342_0 | 53-67   | SHLDKASIMRLAISF  | 0.084 |
| >LocNES1396965342_0 | 54-68   | HLDKASIMRLAISFL  | 0.171 |
| >LocNES1396965342_0 | 63-77   | LAISFLRTHKLLSSV  | 0.047 |
| >LocNES1396965342_0 | 82-96   | ESEAEADQQMDNLYL  | 0.158 |
| >LocNES1396965342_0 | 91-105  | MDNLYLKALEGFIAV  | 0.020 |
| >LocNES1396965342_0 | 92-106  | DNLYLKALEGFIAVV  | 0.011 |
| >LocNES1396965342_0 | 108-122 | QDGDMIFLSENISKF  | 0.043 |
| >LocNES1396965342_0 | 111-125 | DMIFLSENISKFMGL  | 0.059 |
| >LocNES1396965342_0 | 116-130 | SENISKFMGLTQVEL  | 0.105 |
| >LocNES1396965342_0 | 124-138 | GLTQVELTGHSIFDF  | 0.014 |
| >LocNES1396965342_0 | 191-205 | SATWKVLHCTGQVKV  | 0.011 |
| >LocNES1396965342_0 | 337-351 | QPQCIMCVNYVLSEI  | 0.045 |
| >LocNES1396965342_0 | 449-463 | HSTQSEAGSLPAFTV  | 0.032 |
| >LocNES1396965342_0 | 497-511 | DNDLKIEVIEKLFAM  | 0.234 |
| >LocNES1396965342_0 | 516-530 | KDQCSTQTDFNELDL  | 0.203 |
| >LocNES1396965342_0 | 525-539 | FNELDLETAPYIPM   | 0.038 |
| >LocNES1396965342_0 | 564-578 | PQHCFSAMTNIFQPL  | 0.124 |
| >LocNES1396965342_0 | 567-581 | CFSAMTNIFQPLAPV  | 0.008 |
| >LocNES1396965342_0 | 698-712 | VLSPAMVALSNKCLKL | 0.354 |
| >LocNES1396965342_0 | 770-784 | TQNPMRGLGHPLRHL  | 0.056 |
| >LocNES1396965342_0 | 772-786 | NPMRGLGHPLRHLPL  | 0.166 |

## NetNES 1.1 Server - prediction results

>Sequence - NetNES 1.1 prediction

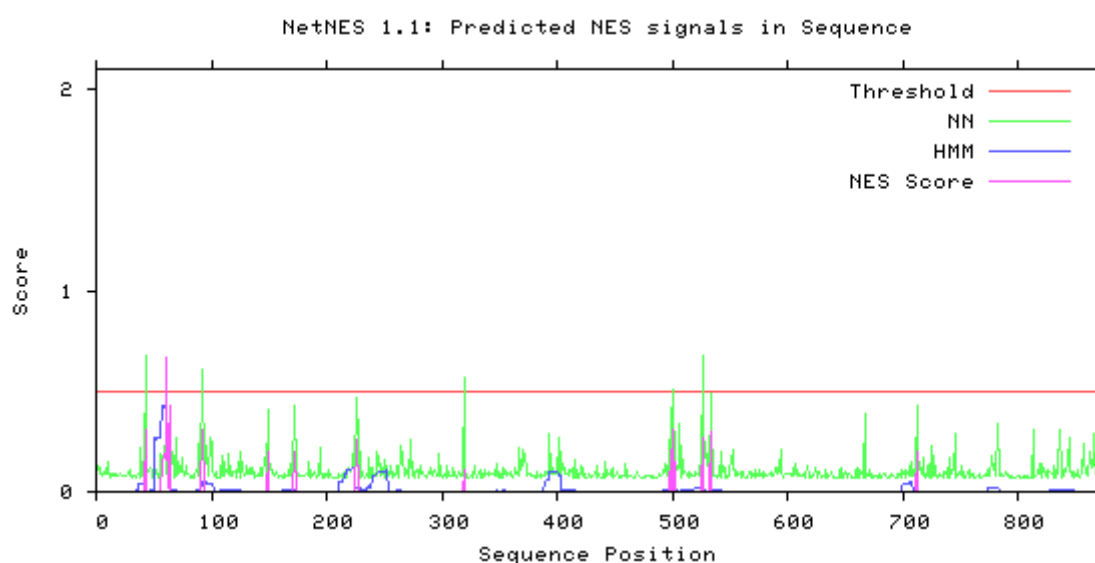

hHIF3α

>sp|Q9Y2N7|HIF3A\_HUMAN Hypoxia-inducible factor 3-alpha OS=Homo sapiens  
OX=9606 GN=HIF3A PE=1 SV=2  
MALGLQARSTTELRLKEKSRDAARSRRSQETEVLYQLAHTLPFARGVSAHLDKASIMRLT  
ISYLRMHRLCAAGEWNQVGAGGEPLDACYLKALEGFVMVLTAEQDMAYLSENVSKHLGLS  
QLELIGHISIFDFIHPCDQEELQDALTPQQTLSSRRKVEAPTERCFSLRMKSTLTSRGRTLNL  
LKAATWKVLNCSGHMRAYKPPAQTSAGSPDSEPPPLQCLVLICEAIPHPGSLEPPLGRGA  
FLSRHSLDMKFTYCDDRIAEEVAGYSPDDLIGCSAYEYIHALDSDAVSKSIHTLLSKGQAV  
TGQYRFLARSGGYLWTQTQATVVSGGRGPQSESIQCVHFLISQVEETGVVLSLEQTEQHS  
RRPIQRGAPSQKDTNPNGDSLDTGPRILAFLLHPPSLSEAALADPRRFCSPDLRRLG  
ILDGASVAATPSTPLATRHQPSPSADLPDELPGVTENVHRLFTSGKDEAVETDLDAQ  
DADALDLEMLAPYISMDDDFQLNASEQLPRAYHRPLGAVPRPRARSFHGLSPPALEPSLL  
PRWGSDPRLSCSSPSRGDPSASSPMAGARKRTLAQSSSEDEDEGVELLGVRPPKRSPSPEH  
ENFLLFPLSLSFLLTGGPAPGSLQDPSTPLNLNLNEPLGLGPSLLSPYSDEDTTQPGGPFQ  
PRAGSAQAD

cNLS Mapper Result cut-off 2.0

| Predicted NLSs in query sequence                    |     |  |
|-----------------------------------------------------|-----|--|
| MALGLQARSTTELRLKEKSRDAARSRRSQETEVLYQLAHTLPFARGVSAH  | 50  |  |
| LDKASIMRLTISYLRMHRLCAAGEWNQVGAGGEPLDACYLKALEGFVMVL  | 100 |  |
| TAEGDMAYLSENVSKHLGLSQLELIGHISIFDFIHPCDQEELQDALTPQQT | 150 |  |
| LSRRKVEAPTERCFSLRMKSTLTSRGRTLNLKAAATWKVLNCSGHMRAYKP | 200 |  |
| PAQTSAGSPDSEPPPLQCLVLICEAIPHPGSLEPPLGRGAFLSRHSLDMK  | 250 |  |
| FTYCDDRIAEEVAGYSPDDLIGCSAYEYIHALDSDAVSKSIHTLLSKGQAV | 300 |  |
| TGQYRFLARSGGYLWTQTQATVVSGGRGPQSESIQCVHFLISQVEETGVV  | 350 |  |
| LSLEQTEQHSRRPIQRGAPSQKDTNPNGDSLDTGPRILAFLLHPPSLSEA  | 400 |  |
| ALAADPRRFCSPDLRRLGPILDGASVAATPSTPLATRHQPSPSADLPD    | 450 |  |
| ELPVGVTENVHRLFTSGKDEAVETDLDAQDADALDLEMLAPYISMDDDF   | 500 |  |
| QLNASEQLPRAYHRPLGAVPRPRARSFHGLSPPALEPSLLPRWGSDPRLS  | 550 |  |
| CSSPSRGDPSASSPMAGARKRTLAQSSSEDEDEGVELLGVRPPKRSPSPEH | 600 |  |
| ENFLLFPLSLSFLLTGGPAPGSLQDPSTPLNLNLNEPLGLGPSLLSPYSDE | 650 |  |
| DTTQPGGPFQPRAGSAQAD                                 | 669 |  |

| Predicted monopartite NLS |          |       |
|---------------------------|----------|-------|
| Pos.                      | Sequence | Score |
|                           |          |       |

| Predicted bipartite NLS |                                    |       |
|-------------------------|------------------------------------|-------|
| Pos.                    | Sequence                           | Score |
| 20                      | RDAARSRRSQETEVLYQLAHTLPFARGVSAHLDK | 2.3   |
| 153                     | RRKVEAPTERCFSLRMKSTLTSRGRTLNLK     | 2.6   |
| 193                     | GHMRAYKPPAQTSAGSPDSEPPPLQCLVLI     | 2     |
| 196                     | RAYKPPAQTSAGSPDSEPPPLQCLVLICE      | 2.7   |
| 196                     | RAYKPPAQTSAGSPDSEPPPLQCLVLICEAI    | 3.3   |
| 361                     | RRPIQRGAPSQKDTNPNGDSLDTGPRILAFLL   | 2.3   |
| 405                     | DPRRFCSPDLRRLGPILDGASVAATPSTP      | 2     |
| 407                     | RRFCSPDLRRLGPILDGASVAATPSTPLATRHQP | 3.3   |



|     |                                   |     |
|-----|-----------------------------------|-----|
| 438 | RHPQSPLSADLPDELPGVTENVHRLFTS      | 3.6 |
| 521 | RPRARSFHGLSPPALEPSLLPRWGSDPRLSCS  | 2   |
| 542 | RWGSDPRLSCSSPSRGDPSASSPMAGARKRTLA | 3.7 |
| 569 | RKRTLAQSSSEDEDEGVELLGVRPPKRS      | 2.3 |
| 567 | GARKRTLAQSSSEDEDEGVELLGVRPP       | 2.5 |
| 567 | GARKRTLAQSSSEDEDEGVELLGVRPPKRS    | 3.5 |
| 567 | GARKRTLAQSSSEDEDEGVELLGVRPPKRS    | 5.2 |
| 567 | GARKRTLAQSSSEDEDEGVELLGVRPPKRS    | 6.8 |
| 569 | RKRTLAQSSSEDEDEGVELLGVRPPKRS      | 5.9 |
| 590 | RPPKRSPPSPHENFLLFPLSLSFLLTGGP     | 2   |
| 590 | RPPKRSPPSPHENFLLFPLSLSFLLTGGP     | 3   |

## NLStradamus

Pre-loaded models cutoff 0.1      4 state HMM static

7 - RARSTTELKESRDAARSRRSQE - 30

512 - YHRPLGAVPRPRARSFHGLSPP - 533

563 - SPMAGARKRTLAQSSSEDEDEGVELLGVRPPKRS - 597

## NucPred

The NucPred score for your sequence is 0.90 (see [score help](#) below)

|     |                                                    |                                    |                   |                    |    |
|-----|----------------------------------------------------|------------------------------------|-------------------|--------------------|----|
| 1   | MALGLQ                                             | RARSTTELKESRDAARSRRSQ              | ETE               | VLYQLAHTLPFARGVSAH | 50 |
| 51  | LDKASIMRLTISYLRMHRLCAAGEWNQVGAGGEPLDACYLKALEGFVMVL | 100                                |                   |                    |    |
| 101 | TAEGDMAYLSENVSKHLGLSQLELIGHSIFDFIHPCDQEELQDALTPQOT | 150                                |                   |                    |    |
| 151 | LSRRKVEAPTERCFSLRMKSTLT                            | SRGRTLNLKAATWKVLNCSGHMRAKYP        | 200               |                    |    |
| 201 | PAQTSPAGSPDSEPPQLCLVLICEAIPHPGSLEPPLGRGAFLSRHSLDMK | 250                                |                   |                    |    |
| 251 | FTYCDDRIA                                          | EVAGYSPDDLIGCSAYEYIHALDS           | DAVSKSIHTLLSKGQAV | 300                |    |
| 301 | TGQYRFLARSGGYLWTQTQATVVSGGRGPQSE                   | SIVCVHFLISQVEETGVV                 | 350               |                    |    |
| 351 | LSLEQTEQHSRRPIQRGAPSQKDTPNPGDSLDTGPRILAF           | LHPPSLSEA                          | 400               |                    |    |
| 401 | ALAADPRRFCSPDLRRL                                  | LGPIILDGASVAATPSTPLATRHPQSPLSADLPD | 450               |                    |    |
| 451 | ELPGVTENVHRLFTSGKDTEAVETDL                         | IAQDADALDLEMLAPYISMDDDF            | 500               |                    |    |
| 501 | QLNASEQLPRAYHRPLGAVPRPRARSFHGLSPPALEPSLLPRWGSDPRLS | 550                                |                   |                    |    |
| 551 | CSSPSRGDPSASSPMAGARKRTLAQSSSEDEDEGVELLGVRPPKRS     | SPSP                               | 600               |                    |    |
| 601 | ENFLLFPLSLSFLLTGGPAPGSLQDPSTPL                     | LNNEPLGLGPSLLSPYSDE                | 650               |                    |    |
| 651 | DTTQPGGPFQPRAGSAQAD                                | 669                                |                   |                    |    |

Positively and negatively influencing subsequences are coloured according to the following scale:

(non-nuclear) negative ||||| positive (nuclear)

## PSORTII

### NUCDISC: discrimination of nuclear localization signals

pat4: none  
pat7: none  
bipartite: none  
content of basic residues: 9.6%  
NLS Score: -0.47

## SeqNLS

**Prediction result (The predicted NLS(s) are underlined)**

Hif3a: MALGLQRARSTTELRLKEKSRDAARSRRSQETEVLYQLAHTLPFARGVSAHLDKASIMRLT

**The predicted NLS(s) (score cutoff = 0.5)**

| Protein ID | Predicted NLS | Start | Stop | The highest score of matches within the prediction |
|------------|---------------|-------|------|----------------------------------------------------|
| Hif3a      | RSRRSQETEVLY  | 24    | 35   | 0.805                                              |

## ELM

Motif Probability Cutoff: 100, 50      No positive NLS/NES result

## NES Finder

Position    NES    Type

=====

34    LYQLAHTLPF    2-3-1  
57    MRLTISYLRM    3-2-1  
487    LEMLPYISM    2-3-1  
603    FLLFPLSLSF    2-3-1  
630    LLNLNEPLGL    2-3-1

## LocNES

| Protein Name        | Position | Sequence        | Score |
|---------------------|----------|-----------------|-------|
| >LocNES1659617645_0 | 33-47    | QETEVLYQLAHTLPF | 0.091 |
| >LocNES1659617645_0 | 49-63    | RGVSAHLDKASIMRL | 0.069 |
| >LocNES1659617645_0 | 51-65    | VSAHLDKASIMRLTI | 0.095 |
| >LocNES1659617645_0 | 54-68    | HLDKASIMRLTISYL | 0.224 |
| >LocNES1659617645_0 | 56-70    | DKASIMRLTISYLRM | 0.265 |
| >LocNES1659617645_0 | 88-102   | PLDACYLKALEGFVM | 0.043 |
| >LocNES1659617645_0 | 89-103   | LDACYLKALEGFVMV | 0.011 |

|                     |         |                 |       |
|---------------------|---------|-----------------|-------|
| >LocNES1659617645_0 | 90-104  | DACYLKALEGFVMVL | 0.016 |
| >LocNES1659617645_0 | 99-113  | GFVMVLTAEGDMAYL | 0.075 |
| >LocNES1659617645_0 | 109-123 | DMAYLSENVSKHLGL | 0.237 |
| >LocNES1659617645_0 | 114-128 | SENVSKHLGLSQLEL | 0.256 |
| >LocNES1659617645_0 | 122-136 | GLSQLELIGHSIFDF | 0.019 |
| >LocNES1659617645_0 | 156-170 | SRRKVEAPTERCFSL | 0.016 |
| >LocNES1659617645_0 | 334-348 | QSESIVCVHFLISQV | 0.022 |
| >LocNES1659617645_0 | 343-357 | FLISQVEETGVVLSL | 0.032 |
| >LocNES1659617645_0 | 444-458 | PQSPLSADLPDELPV | 0.089 |
| >LocNES1659617645_0 | 468-482 | TSGKDTEAVETDLDI | 0.014 |
| >LocNES1659617645_0 | 477-491 | ETDLDIAQDADALDL | 0.387 |
| >LocNES1659617645_0 | 486-500 | ADALDLEMLAPYISM | 0.108 |
| >LocNES1659617645_0 | 600-614 | PSPEHENFLLFPLSL | 0.265 |
| >LocNES1659617645_0 | 602-616 | PEHENFLLFPLSLSF | 0.539 |
| >LocNES1659617645_0 | 603-617 | EHENFLLFPLSLSFL | 0.500 |
| >LocNES1659617645_0 | 604-618 | HENFLLFPLSLSFLL | 0.320 |
| >LocNES1659617645_0 | 629-643 | DPSTPLLNLNEPLGL | 0.547 |

## NetNES 1.1 Server - prediction results

>Sequence - NetNES 1.1 prediction

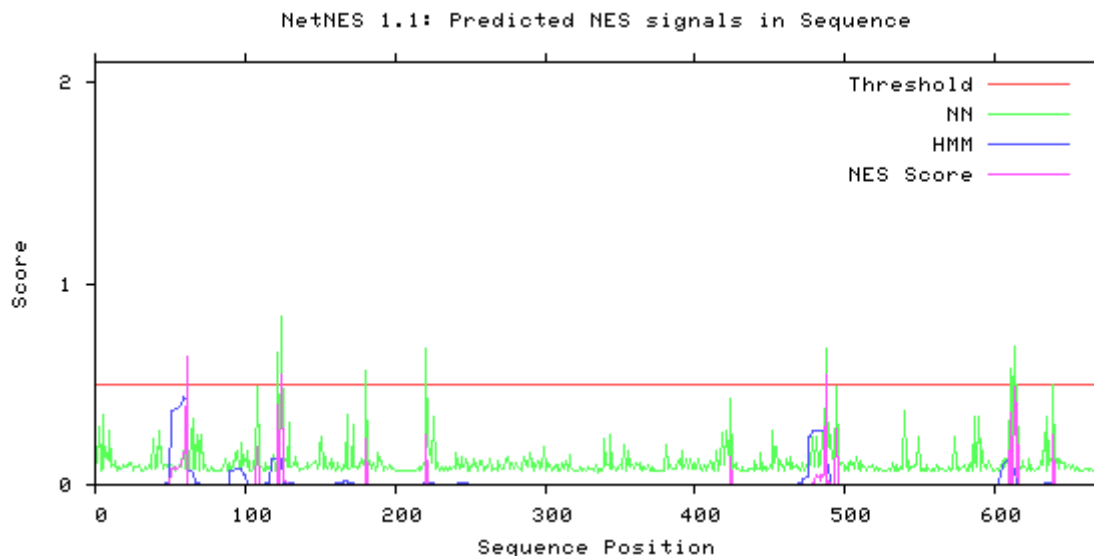

## hSIM1

>sp|P81133|SIM1\_HUMAN Single-minded homolog 1 OS=Homo sapiens OX=9606  
GN=SIM1 PE=2 SV=2  
MKEKSKNAARTREKENSEFYELAKLLPLPSAITSQLDKASIIRLTTSYLKMRVVFPEGL  
GEAWGHSSRTSPLDNVGRELGSHLLQTLDGFI FVVAPDGKIMYISETASVHLGLSQVELT

GNSIY EYIHPADHDEMTAVLTAHQPYHSHFVQ EYEIERSFFLRMKCVLAKRNAGLTCCGGY  
KVIHCSGYLKIRQYSLDMSPFDG CYQNVGLVAVGHSLPPSAVTEIKLHSNMFMFRASLDM  
KLIFLDSRVAELTG YEPQDLIEKTLYHHVHGCDTFHLRCAHLLLVKGQVTTKYRFLAK  
HGGWVWVQSYATIVHNSRSSRPHCIVSVNYVLTDEYKGLQLSLDQISASKPAFSYTS  
TPTMTDNRKGAKSRLSSSKSKSRTSPYPQYSGFHTERSESDHDSQWGGSP LDTASPQLL  
DPADRPGSQHDASCAYRQFSDRSSLCYGFALDHSRLVEERHFHTQACEGGRCEAGRYFLG  
TPQAGREPWWGSRAALPLTKASPESREAYENSMPHIASVHRIHGRGHWDEDSVSSPDPG  
SASESGDRYRTEQYQSSPHEPSKIETLIRATQOMIKEEENRLQLRKAPSDQLASINGAGK  
KHS LCFANYQQPPPTGEVCHGSALANTSPCDHIQQREGKMLSPHENDYDNSPTALSRISS  
PNSDRISKSSLILAKDYLHSDISP HQTAGDHPTVSPNCFGSHRQYFDKHAYTLTG YALEH  
LYDSETIRNYS LGCNGSHFDVTSHLRMQPDPAQGHKGTSVIITNGS

## cNLS Mapper Result cut-off 2.0

| Predicted NLSs in query sequence                     |     |
|------------------------------------------------------|-----|
| MKEKSKNAARTREKENSEFYELAKLLPLPSAITSQLDKAS IIRLTTSYL   | 50  |
| KMRVVFPEGLGEAWGHSSRTSPLDNVGRELGSHLLQTLDGFI FVVAPDGK  | 100 |
| IMYISETASVHLGLSQVELTGNSIY EYIHPADHDEMTAVLTAHQPYHSHF  | 150 |
| VQ EYEIERSFFLRMKCVLAKRNAGLTCCGGYKVIHCSGYLKIRQYSLDMSP | 200 |
| FDG CYQNVGLVAVGHSLPPSAVTEIKLHSNMFMFRASLDMKLIFLDSRVA  | 250 |
| ELTG YEPQDLIEKTLYHHVHGCDTFHLRCAHLLLVKGQVTTKYRFLAK    | 300 |
| HGGWVWVQSYATIVHNSRSSRPHCIVSVNYVLTDEYKGLQLSLDQ I SAS  | 350 |
| KPAFSYTSSTPTMTDNRKGAKSRLSSSKSKSRTSPYPQYSGFHTERSES    | 400 |
| DHDSQWGGSP LDTASPQLLDPADRPGSQHDASCAYRQFSDRSSLCYGFA   | 450 |
| LDHSRLVEERHFHTQACEGGRCEAGRYFLGTPQAGREPWWGSRAALPLTK   | 500 |
| ASPESREAYENSMPHIASVHRIHGRGHWDEDSVSSPDPGSASESGDRYR    | 550 |
| TEQYQSSPHEPSKIETLIRATQOMIKEEENRLQLRKAPSDQLASINGAGK   | 600 |
| KHS LCFANYQQPPPTGEVCHGSALANTSPCDHIQQREGKMLSPHENDYDN  | 650 |
| SPTALSRISSPNSDRISKSSLILAKDYLHSDISP HQTAGDHPTVSPNCFG  | 700 |
| SHRQYFDKHAYTLTG YALEHLYDSETIRNYS LGCNGSHFDVTSHLRMQPD | 750 |
| PAQGHKGTSVIITNGS                                     | 766 |

### Predicted monopartite NLS

| Pos. | Sequence | Score |
|------|----------|-------|
|      |          |       |

### Predicted bipartite NLS

| Pos. | Sequence                             | Score |
|------|--------------------------------------|-------|
| 2    | KEKSKNAARTREKENSEFYELAKLLPLP         | 2     |
| 4    | KSKNAARTREKENSEFYELAKLLPLPSAI        | 3     |
| 6    | KNAARTREKENSEFYELAKLLPLPSAITS        | 2.3   |
| 10   | RTRREKENSEFYELAKLLPLPSAITSQLDKASI    | 2     |
| 74   | DNVGRELGSHLLQTLDGFI FVVAPDGKIMYIS    | 2.3   |
| 158  | RSFFLRMKCVLAKRNAGLTCCGGYKVIHCSGYLKI  | 2.4   |
| 163  | RMKCVLAKRNAGLTCCGGYKVIHCSGYLKIRQYS   | 3.3   |
| 163  | RMKCVLAKRNAGLTCCGGYKVIHCSGYLKIRQY    | 2.4   |
| 163  | RMKCVLAKRNAGLTCCGGYKVIHCSGYLKIRQYSLD | 3.4   |
| 187  | GYLKIRQYSLDMSPFDG CYQNVGLVAVGH       | 2.3   |

|     |                                            |            |
|-----|--------------------------------------------|------------|
| 223 | TEIKLHSNMFMFRASLDMKLI FLDSRVAELT           | 2.2        |
| 235 | <b>RASLDMKLI FLDSRVAELTGYEPQDLIEKTL</b> YH | <b>2.8</b> |
| 293 | KYYRFLAKHGGVWVQSYATIVHNSRSS                | 2.4        |
| 347 | <b>ISASKPAFSYTSSTPTMTDNRKGAKSRLSSS</b>     | <b>2.7</b> |
| 486 | REPWWGSRAALPLTKASPESREAYENSMPHIASV         | 2          |
| 493 | RAALPLTKASPESREAYENSMPHIASVHRIHGRG         | 2.2        |
| 581 | RLQLRKAPSDQLASINGAGKKHSLCFANYQQPP          | 3          |
| 597 | GAGKKHSLCFANYQQPPPTGEVCHGSALANT            | 2          |
| 600 | <b>KKHSLCFANYQQPPPTGEVCHGSALANTS</b>       | <b>3.6</b> |
| 636 | REGKMLSPHENDYDNSPTALSRISPPNSDRI            | 2.2        |
| 703 | <b>RQYFDKHAYTLTGYLEHLYDSETIRNYSLGC</b>     | <b>2.6</b> |

## NLStradamus

cutoff 0.1; Pre-loaded models 4 state HMM static

2 - KEKSKNAARTRREKENSEFYELA - 24

365 - TDNRKGAKSRLSSSKSKSRTSP - 386

## PSORTII

[NUCDISC: discrimination of nuclear localization signals](#)

pat4: none  
pat7: none  
bipartite: none  
content of basic residues: 10.3%  
NLS Score: -0.47

## SeqNLS

**Prediction result (The predicted NLS(s) are underlined)**

Sim1: MKEKSKNAART**TRREKENSEFYELAKLLPLPSAITSQLDKASIIRLTTSYLKMRVVFPEGL**

**The predicted NLS(s) (score cutoff = 0.5)**

| Protein ID | Predicted NLS | Start | Stop | The highest score of matches within the prediction |
|------------|---------------|-------|------|----------------------------------------------------|
|------------|---------------|-------|------|----------------------------------------------------|

No NLS positive result

## ELM

Motif Probability Cutoff: 100 and 50 No positive NLS/NES result

## NES Finder

Position NES Type

=====

20 FYELAKLLPL 2-3-1

231 MFMFRAFLDM 2-3-1

## LocNES

| Protein Name        | Position | Sequence        | Score |
|---------------------|----------|-----------------|-------|
| >LocNES1522303438_0 | 19-33    | KENSEFYELAKLLPL | 0.254 |
| >LocNES1522303438_0 | 35-49    | SAITSQLDKASIIRL | 0.253 |
| >LocNES1522303438_0 | 42-56    | DKASIIRLTTSYLKM | 0.368 |
| >LocNES1522303438_0 | 46-60    | IIRLTTSYLKMRVVF | 0.011 |
| >LocNES1522303438_0 | 83-97    | ELGSHLLQTLDGFIF | 0.062 |
| >LocNES1522303438_0 | 84-98    | LGSHLLQTLDGFIFV | 0.066 |
| >LocNES1522303438_0 | 85-99    | GSHLLQTLDGFIFVV | 0.042 |
| >LocNES1522303438_0 | 102-116  | DGKIMYISETASVHL | 0.130 |
| >LocNES1522303438_0 | 104-118  | KIMYISETASVHLGL | 0.200 |
| >LocNES1522303438_0 | 107-121  | YISETASVHLGLSQV | 0.030 |
| >LocNES1522303438_0 | 109-123  | SETASVHLGLSQVEL | 0.088 |
| >LocNES1522303438_0 | 217-231  | VGHSLPPSAVTEIKL | 0.042 |
| >LocNES1522303438_0 | 223-237  | PSAVTEIKLHSNMFM | 0.087 |
| >LocNES1522303438_0 | 230-244  | KLHSNMFMFRASLDM | 0.042 |
| >LocNES1522303438_0 | 232-246  | HSNMFMFRASLDMKL | 0.029 |
| >LocNES1522303438_0 | 233-247  | SNMFMFRASLDMKLI | 0.011 |
| >LocNES1522303438_0 | 234-248  | NMFMFRASLDMKLIF | 0.034 |
| >LocNES1522303438_0 | 235-249  | MFMFRAFLDMKLIFL | 0.113 |
| >LocNES1522303438_0 | 242-256  | LDMKLIFLDSRVAEL | 0.046 |
| >LocNES1522303438_0 | 275-289  | GCDTFHLRCAHHLLL | 0.098 |
| >LocNES1522303438_0 | 276-290  | CDTFHLRCAHHLLLV | 0.023 |
| >LocNES1522303438_0 | 737-751  | GCNGSHFDVTSHLRM | 0.029 |

## NetNES 1.1 Server - prediction results

>Sequence - NetNES 1.1 prediction

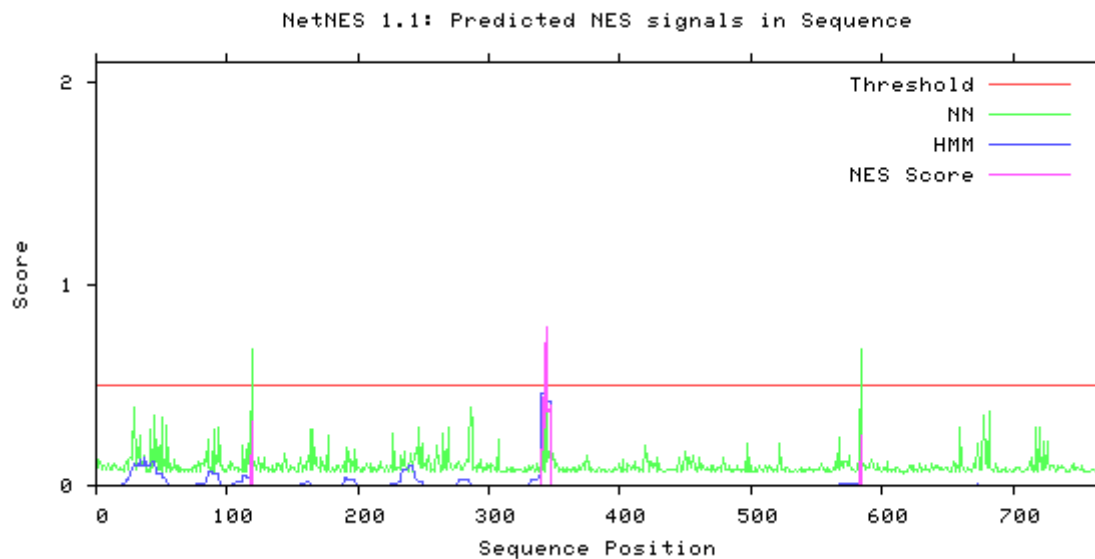

## hSIM2

```
>sp|Q14190|SIM2_HUMAN Single-minded homolog 2 OS=Homo sapiens OX=9606
GN=SIM2 PE=1 SV=2
MKEKSKNAAKTRREKENGEFYELAKLLPLPSAITSQLDKASIIRLTTSYLKMRAVFPEGL
GDAWGQPSRAGPLDGVAKELGSHLLQTL DGFV FVVASDGKIMYISETASVHLGLSQVELT
GNSIYEYIHPSDHDEMTAVLTAHQPLHHHLLQEYEIERSFFLRMKCVLAKRNAGLTCSGY
KVIHCSGYLKIRQYMLDMSLYDSCYQIVGLVAVGQSLPPSAITEIKLYSNMFMFRASLDL
KLIFLDSRVTEVTGYEPQDLIEKTLYHHVHGCDVFHLRYAHHLLL VKGQVTTKYRLLSK
RGGWVWVQSYATVVHNSRSSRPHCIVSVNYVLTEIEYKELQLSLEQVSTAKSQDSWRTAL
STSQETRKLVPKNTKMKTKLR TN PYP PQQYSSFQMDKLECGQLGNWRASPPASAAAPPE
LQPHSESSDLLYTPSYSLPFSYHYGHFPLDSHV FSSKKPMLPAKFGQPQGSPCEVARFFL
STLPASGECQWHYANPLVPSSSSPAKNPPEPPANTARHSLVPSYEAPAAAVRRFGEDTAP
PSFPPSCGHYREEPALGPAKAAARQAARDGARLALARA APECCAPPTPEAPGAPQLPFVLL
NYHRVLARRGPLGGAAPAASGLACAPGGPEAATGALRLRHPSAATSPPGAPLPHYLGAS
VIITNGR
```

## cNLS Mapper Result cut-off score 2.0

| Predicted NLSs in query sequence                            |     |
|-------------------------------------------------------------|-----|
| <b>MKEKSKNAAKTRREKENGEFYELAKLLPLPSAITS</b>                  | 50  |
| <b>KMRAVFPEGLGDAWGQPSRAGPLDGVAKELGSHLLQTL DGFV FVVASDGK</b> | 100 |
| <b>IMYISETASVHLGLSQVELTGNSIYEYIHPSDHDEMTAVLTAHQPLHHHL</b>   | 150 |
| <b>LQEYEIERSFFLRMKCVLAKRNAGLTCSGYKVIHCSGYLKIRQYMLDMSL</b>   | 200 |
| <b>YDSCYQIVGLVAVGQSLPPSAITEIKLYSNMFMFRASLDLKLIFLDSRV</b>    | 250 |
| <b>EVTGYEPQDLIEKTLYHHVHGCDVFHLRYAHHLLL VKGQVTTKYRLLSK</b>   | 300 |
| <b>RGGWVWVQSYATVVHNSRSSRPHCIVSVNYVLTEIEYKELQLSLEQVSTA</b>   | 350 |
| <b>KSQDSWRTALSTSQETRKLVPKNTKMKTKLR TN PYP PQQYSSFQMDKLE</b> | 400 |
| <b>CGQLGNWRASPPASAAAPPELQPHSESSDLLYTPSYSLPFSYHYGHFPLD</b>   | 450 |
| <b>SHV FSSKKPMLPAKFGQPQGSPCEVARFFLSTLPASGECQWHYANPLVPS</b>  | 500 |
| <b>SSSPAKNPPEPPANTARHSLVPSYEAPAAAVRRFGEDTAPPSFPPSCGHYR</b>  | 550 |

|                                     |                       |                         |     |
|-------------------------------------|-----------------------|-------------------------|-----|
| EEPAL                               | GPAKAARQAARDGARLALARA | AECCAPPTPEAPGAPAQLPFVLL | 600 |
| NYHRVLARRGPLGGAAPASGLACAPGGPEAATGAL | RLRHPS                | PAATSPPG                | 650 |
| APLPHYL                             | GASV                  | IITN                    | 667 |

### Predicted monopartite NLS

| Pos. | Sequence | Score |
|------|----------|-------|
|      |          |       |

### Predicted bipartite NLS

| Pos. | Sequence                            | Score |
|------|-------------------------------------|-------|
| 2    | KEKSKNAAKTRREKENGFEYELAKLLPLP       | 2     |
| 4    | KSKNAAKTRREKENGFEYELAKLLPLPSAI      | 2.9   |
| 6    | KNAAKTRREKENGFEYELAKLLPLPSAITS      | 3.7   |
| 74   | DGVAKELGSHLLQTL                     | 3.5   |
| 158  | RSFFLRMKCVLAKRNAGLTCSGYKVIHCSGYLKI  | 2.4   |
| 163  | RMKCVLAKRNAGLTCSGYKVIHCSGYLKIRQY    | 3.5   |
| 163  | RMKCVLAKRNAGLTCSGYKVIHCSGYLKIRQYM   | 2.7   |
| 163  | RMKCVLAKRNAGLTCSGYKVIHCSGYLKIRQYMLD | 3.2   |
| 187  | GYLKIRQYMLDMSLYDSCYQIVGLVAVGQ       | 2.1   |
| 235  | RASLDLKLIFLDSRVTEVTGYEPQDLIEKTLYH   | 2.8   |
| 273  | DVFHLRYAHHLLLVKGQVTTKYRLLSKRGGW     | 2.2   |
| 293  | KYYRLLSKRGGWVWVQSYATVVHNSRSS        | 2.2   |
| 296  | RLLSKRGGWVWVQSYATVVHNSRSSRPHCI      | 2.3   |
| 296  | RLLSKRGGWVWVQSYATVVHNSRSSRPHCIVS    | 2.7   |
| 351  | KSQDSWR                             | 6.1   |
| 365  | ETRKLVPKNTKMKTKLRTNPYPQQYSSF        | 2.4   |
| 373  | KNTKMKTKLRTNPYPQQYSSFQMDKLECG       | 2.8   |
| 375  | TKMKTKLRTNPYPQQYSSFQMDKLECGQL       | 2.6   |
| 454  | FSSKKPMLPAKFGQPQSPCEVARFFLSTLP      | 2.6   |
| 454  | FSSKKPMLPAKFGQPQSPCEVARFFLSTLP      | 2.4   |
| 556  | GPAKAARQAARDGARLALARA               | 2.4   |
| 637  | RLRHPS                              | 2.9   |

## NLStradamus

Prediction cutoff 0.1; Pre-loaded models 4 state HMM static

2 - KEKSKNAAKTRREKENGFEYELAK - 25

363 - SQETRKLVPKNTKMKTKLRTNPY - 386

556 - GPAKAARQAARDGARLA - 572

## NucPred

The NucPred score for your sequence is 0.47 (see [score help](#) below)

|    |                                       |     |
|----|---------------------------------------|-----|
| 1  | MKEKSKNAAKTRREKENGFEYELAKLLPLPSAITS   | 50  |
| 51 | KMRAVFPEGLDAWGQPSRAGPLDGVAKELGSHLLQTL | 100 |



```

101  IMYISETASVHLGLSQVELTGNSIYEYIHPSDHDEMTAVLTAHQPLHHHL 150
151  LQEYEIERSFFLRMKCVLAKRNAGLTCSGYKVIHCSGYLKIRQYMLDMSL 200
201  YDSCYQIVGLVAVGQSLPPSAITEIKLYSNMFMFRASLDLKLIFLDSRVT 250
251  EVTGYEPQDLIEKTLYHHVHGCDFHLRYAHHLLLVKGQVTTKYRLLSK 300
301  RGGWVWVQSYATVVHNSRSPHCIVSVNYVLTEIEYKELQSLSEQVSTA 350
351  KSQDSWR TALSTSQETRKLVKPKNTKMKTKLR TNPPQYSSFQMDKLE 400
401  CGQLGNWRASPPASAAAPPELQPHSESDLLYTPSYSLPFSYHYGHFPLD 450
451  SHVFSSKKPMLPAKFGQPQGSPEVARFFLSTLPASGECQWHYANPLVPS 500
501  SSSPAKNPPEPPANTARHSLVPSYEAPAAVRRFGEDTAPPSFPSCGHR 550
551  EEPALGPAKAARQAARDGARLALARAAPCCAPPTPEAPGAPQLPFVLL 600
601  NYHRVLARRGPLGGAAPASGLACAPGGPEAATGALRLRHPSAATSPPG 650
651  APLPHYLGASVIITNGR 667

```

Positively and negatively influencing subsequences are coloured according to the following scale:

(non-nuclear) negative ||||| positive

## PSORTII

[NUCDISC: discrimination of nuclear localization signals](#)

pat4: none  
pat7: none  
bipartite: none  
content of basic residues: 10.3%  
NLS Score: -0.47

## SeqNLS

**Prediction result (The predicted NLS(s) are underlined)**

Sim2: MKEKSKNAAKTRREKENGFEYELAKLLPLPSAITSQLDKASIIRLTTSYLMRAVFPPEGL

The predicted NLS(s) (score cutoff = 0.5)

| Protein ID | Predicted NLS    | Start | Stop | The highest score of matches within the prediction |
|------------|------------------|-------|------|----------------------------------------------------|
| Sim2       | SKNAAKTRREKENGFE | 5     | 20   | 0.598                                              |

## ELM

Motif Probability Cutoff: 100 and 50 No positive NLS/NES result

## NES Finder

Position NES Type

=====

```

8  MANSINGLEM 3-2-1
65 FYELAKLLPL 2-3-1
276 MFMFRASLDL 2-3-1

```

## LocNES

| Protein Name       | Position | Sequence         | Score |
|--------------------|----------|------------------|-------|
| >LocNES112173684_0 | 19-33    | KENGEFYELAKLLPL  | 0.228 |
| >LocNES112173684_0 | 35-49    | SAITSQLDKASIIRL  | 0.352 |
| >LocNES112173684_0 | 42-56    | DKASIIRLTTSYLKM  | 0.338 |
| >LocNES112173684_0 | 83-97    | ELGSHLLQTLDG FVF | 0.029 |
| >LocNES112173684_0 | 84-98    | LGSHLLQTLDG FVFV | 0.055 |
| >LocNES112173684_0 | 85-99    | GSHLLQTLDG FVFVV | 0.032 |
| >LocNES112173684_0 | 102-116  | DGKIMYISETASVHL  | 0.130 |
| >LocNES112173684_0 | 104-118  | KIMYISETASVHLGL  | 0.200 |
| >LocNES112173684_0 | 107-121  | YISETASVHLGLSQV  | 0.030 |
| >LocNES112173684_0 | 109-123  | SETASVHLGLSQVEL  | 0.088 |
| >LocNES112173684_0 | 190-204  | SGYLKIRQYMLDMSL  | 0.105 |
| >LocNES112173684_0 | 217-231  | VGQSLPPSAITEIKL  | 0.048 |
| >LocNES112173684_0 | 223-237  | PSAITEIKLYSNMFM  | 0.044 |
| >LocNES112173684_0 | 230-244  | KLYSNMFMFRASLDL  | 0.081 |
| >LocNES112173684_0 | 232-246  | YSNMFMFRASLDLKL  | 0.124 |
| >LocNES112173684_0 | 233-247  | SNMFMFRASLDLKL   | 0.039 |
| >LocNES112173684_0 | 234-248  | NMFMFRASLDLKLIF  | 0.136 |
| >LocNES112173684_0 | 235-249  | MFMFASLDLKLIFL   | 0.080 |
| >LocNES112173684_0 | 242-256  | LDLKLIFLDSRVTEV  | 0.018 |
| >LocNES112173684_0 | 275-289  | GCDVFHLRYAHHLLL  | 0.083 |
| >LocNES112173684_0 | 276-290  | CDVFHLRYAHHLLLV  | 0.026 |
| >LocNES112173684_0 | 325-339  | RPHCIVSVNYVLTEI  | 0.026 |
| >LocNES112173684_0 | 590-604  | PEAPGAPQLPFVLL   | 0.054 |
| >LocNES112173684_0 | 653-667  | PGAPLPHYLGASVII  | 0.085 |

## NetNES 1.1 Server - prediction results

---

>Sequence - NetNES 1.1 prediction

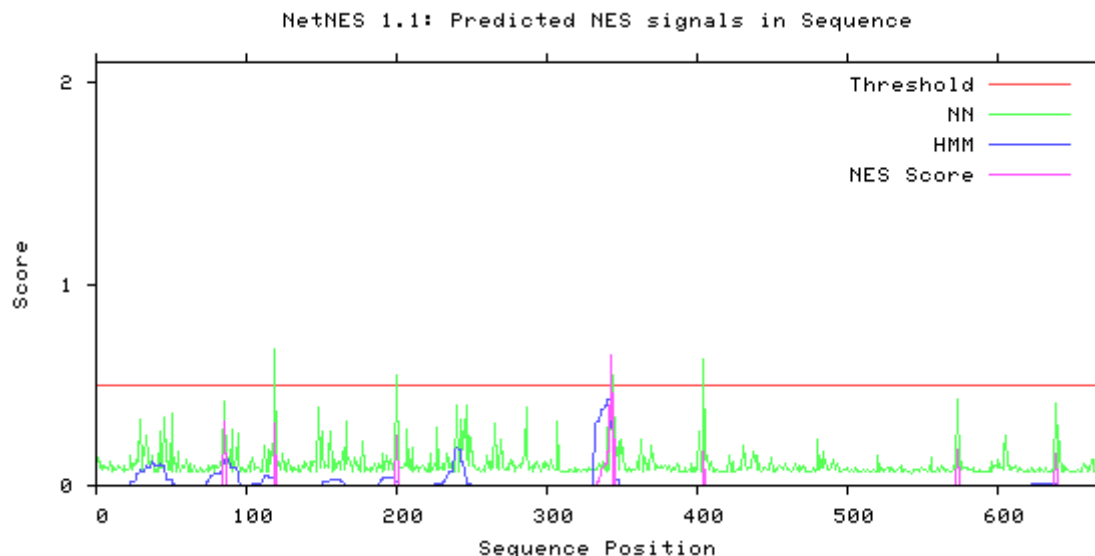

## hClock

```
>sp|O15516|CLOCK_HUMAN Circadian locomoter output cycles protein kaput
OS=Homo sapiens OX=9606 GN=CLOCK PE=1 SV=1
MLFTVSCSKMSSIVDRDDSSIFDGLVEEDDKDKAKRVSRNKSEKKRRDQFNVLIKELGSM
LPGNARKMDKSTVLQKSIDFLRKHKEITAQSDASEIRQDWKPTFLSNEEFTQLMLEALDG
FFLAIMTDGSIIYVSESVTSLLEHLPSDLVDQSIFNFIPEGEHSEVYKILSTHLLSDSL
TPEYLKSKNQLEFCCHMLRGITDPKEPSTYEVVKFIGNFKSLNSVSSSAHNGFEGTIQRT
HRPSYEDRVC FVATVRLATPQFIKEMCTVEEPNEEFTSRHSLEWKFLFLDHRAPPIIGYL
PFEVLGTSGYDYYHVDDLENLAKCHEHLMQYGGKSCYYRFLTKGQQWIWLQTHYYITYH
QWNSRPEFIVCTHTTVVSYAEVRAERRRELGIEESLPETAADKSQDSGSDNRINTVSLKEA
LERFDHSPTPSASSRSSRKSSHTAVSDPSSPTTKIPTDTSTPPRQHLP AHEKMVQRRSSF
SSQSINSQSVGSSLTQPVMSQATNLPI PQGMSQFQFSAQLGAMQHLKDQLEQRTRMIEAN
IHRQQEELRKIQEQLQMVHGQGLQMFLLQSNPGLNFGSVQLSSGNSSNIQQ LAPINMQGQ
VVPTNQIQSGMNTGHIGTTQHMIQQQTLQSTSTQSQQNVLSGHSQQTSLPSQTQSTLTAP
LYNTMVISQPAAGSMVQIPSSMPQNSTQSAAVTFTQDRQIRFSQGGQLVTKLV TAPVAC
GAVMVPSTMLMGQVVTAYPTFATQQQQSQTLSVTQQQQQQSSQEQQLT SVQQPSQAQLTQ
PPQQFLQTSRLLHGNPSTQLILSAAFP LQQSTFPQSHHQHQSSQQQQQLSRHRTDSL PDP
SKVQPPQ
```

## cNLS Mapper Result score 2.0

| Predicted NLSs in query sequence                     |     |
|------------------------------------------------------|-----|
| MLFTVSCSKMSSIVDRDDSSIFDGLVEEDDKDKAKRVSRNKSEKKRRDQF   | 50  |
| NVLIKELGSM LPGNARKMDKSTVLQKSIDFLRKHKEITAQSDASEIRQDW  | 100 |
| KPTFLSNEEFTQLMLEALDGGFLAIMTDGSIIYVSESVTSLLEHLPSDLV   | 150 |
| DQSIFNFIPEGEHSEVYKILSTHLLSDSLTPEYLKSKNQLEFCCHMLRG    | 200 |
| TIDPKEPSTYEVVKFIGNFKSLNSVSSSAHNGFEGTIQRTHRPSYEDRVC   | 250 |
| FVATVRLATPQFIKEMCTVEEPNEEFTSRHSLEWKFLFLDHRAPPIIGYL   | 300 |
| PFEVLGTSGYDYYHVDDLENLAKCHEHLMQYGGKSCYYRFLTKGQQWIW    | 350 |
| LQTHYYITYHQWNSRPEFIVCTHTTVVSYAEVRAERRRELGIEESLPETA   | 400 |
| DKSQDSGSDNRINTVSLKEALERFDHSPTPSASSRSSRKSSHTAVSDPSS   | 450 |
| TPTTKIPTDTSTPPRQHLP AHEKMVQRRSSFSSQSINSQSVGSSLTQPVMS | 500 |
| QATNLPI PQGMSQFQFSAQLGAMQHLKDQLEQRTRMIEANIHRQQEELRK  | 550 |

|                                                     |     |
|-----------------------------------------------------|-----|
| IQEQQLQMVHGQGLQMFLOQSNPGLNFGSVQLSSGNSSNIQQLAPINMQGQ | 600 |
| VVPTNQIQSGMNTGHIGTTQHMIQQQTLOSTSTQSQQNVLSGHSQQTSLP  | 650 |
| SQTQSTLTAPLYNTMVISQPAAGSMVQIPSSMPQNSTQSAAVTTFTQDRQ  | 700 |
| IRFSQGGQLVTKLVTAQVACGAVMVPSTMLMGQVVTAYPTFATQQQSQT   | 750 |
| LSVTQQQQQQSSQEQQLTQVQQPSQAQLTQPPQQFLQTSRLLHGNPSTQL  | 800 |
| ILSAAFPLQQSTFPQSHHQHQSQQQQQLSRHRTDSLDPQSKVQPQ       | 846 |

| Predicted monopartite NLS |          |       |
|---------------------------|----------|-------|
| Pos.                      | Sequence | Score |
|                           |          |       |

| Predicted bipartite NLS |                                       |       |
|-------------------------|---------------------------------------|-------|
| Pos.                    | Sequence                              | Score |
| 36                      | RVSRNKSEKKRRDQFNVLIKELGSMPLPGNARKMDKS | 3.7   |
| 39                      | RNKSEKKRRDQFNVLIKELGSMPLPGNARKMDKS    | 2.8   |
| 39                      | RNKSEKKRRDQFNVLIKELGSMPLPGNARKMDKST   | 7.3   |
| 39                      | RNKSEKKRRDQFNVLIKELGSMPLPGNARKMDKST   | 3.2   |
| 239                     | RTHRPSYEDRVCFVATVRLATPQFIKEMCT        | 2.9   |
| 248                     | RVCFVATVRLATPQFIKEMCTVEEPNEEFTSRHSLE  | 2.1   |
| 256                     | RLATPQFIKEMCTVEEPNEEFTSRHSLEWKFLFLD   | 3.4   |
| 256                     | RLATPQFIKEMCTVEEPNEEFTSRHSLEWKFLFLD   | 2.4   |
| 411                     | RINTVSLKEALERFDHSPTPSASSRSSRKSSHT     | 3.5   |
| 411                     | RINTVSLKEALERFDHSPTPSASSRSSRKSSHTA    | 2.5   |
| 435                     | RSSRKSSHTAVSDPSSTPTKIPTDTSTPPR        | 2.4   |
| 451                     | TPTKIPTDTSTPPRQHLPAHEKMOVRRS          | 3.7   |
| 451                     | TPTKIPTDTSTPPRQHLPAHEKMOVRRSSFS       | 3.9   |
| 526                     | LKDQLEQRTMIEANIHRQQEELRKIQE           | 3.1   |

NLStradamus cutoff 0.1

|                    |                                                                        |
|--------------------|------------------------------------------------------------------------|
| Posterior<br>@ 0.1 | 27 - EEDDKDKAKRVSRNKSEKKRRDQFNVLIKELGSMPLPGNARKMDKSTVLQKSIDFLRKHK - 85 |
|--------------------|------------------------------------------------------------------------|

NucPred

The NucPred score for your sequence is 0.94 (see [score help](#) below)

|     |                                                       |     |
|-----|-------------------------------------------------------|-----|
| 1   | MLFTVSCSKMSSIVDRDDSSIFDGLVEEDDKDKAKRVSRNKSEKKRRDQF    | 50  |
| 51  | NVLIKELGSMPLPGNARKMDKSTVLQKSIDFLRKHK EIT AQSDASEIRQDW | 100 |
| 101 | KPTFLSNEEFTQLMLEALDGFFLAIMTDGSIIVSVESVTSLLEHLPSDLV    | 150 |
| 151 | DQSIFNFIPEGEHSEVYKILSTHLLSLSLTPEYLKSKNQLEFCCHMLRG     | 200 |
| 201 | TIDPKEPSTY EYVKFIGNFKSLNSVSSSAHNGFEGTIQ RTHRPSYEDRVC  | 250 |
| 251 | FVATVRLATPQFIKEMCTVEEPNEEFTSRHSLEWKFLFLDHRAPPIIGYL    | 300 |
| 301 | PFEVLGTSGYDYHVDLENLAKCHEHLMQY GKGKSCYYRFLTKGQQWIW     | 350 |
| 351 | LQTHYYITYHQWNSRPEFIVCTHTVVSYA EVRAERRRELGI EESLPETAA  | 400 |

```

401 DKSQDSGSDNRINTVSLKEALERFDHSPTPSASSRSSRKSSHTAVSDPSS 450
451 TPTKIPTDTSTPPRQHLPAHEKMOVRRSSFSSQSINSQSVGSSLTQPVMS 500
501 QATNLPIPIQGMSQFQFSAQLGAMQHLKDQLEQRTMIEANIHRQQEELRK 550
551 IQEQLQMVHGQGLQMFLOQSNPGLNFGSVQLSSGNSSNIQQIAPINMQGQ 600
601 VVPTNQIQSGMNTGHIGTTQHMIQQOTLQSTSTQSQQNVLSGHSQOTSLP 650
651 SQTQSTLTAPLYNTMVISQPAAGSMVQIPSSMPQNSTQSAAVTTFTQDRQ 700
701 IRFSQGGQLVTKLVTAPVACGAVMVPSTMLMGQVVTAYPTFATQQQSQSQT 750
751 LSVTQQQQQQSSQEQLTSVQQPSQAQLTQPPQQFLQTSRLLHGNPSTQL 800
801 ILSAAFPLQQSTFPQSHHQHQSQQQQQLSRHRTDSLDPDSKVQFPQ 846

```

Positively and negatively influencing subsequences are coloured according to the following scale:

(non-nuclear) negative 

## PSORTII

[NUCDISC: discrimination of nuclear localization signals](#)

```

pat4: KKRR (5) at 44
pat4: RKHK (3) at 82
pat7: none
bipartite: none
content of basic residues: 8.5%
NLS Score: 0.03

```

## SeqNLS

**Prediction result (The predicted NLS(s) are underlined)**

Clock: MLFTVSCSKMSSIVDRDDSSIFDGLVEEDDKDKAKRVSRNKSEKKRRDQFNVLIELGSM

**Definition of different colors in predictions**

| score range | color                                                                               |
|-------------|-------------------------------------------------------------------------------------|
| 0.1-0.3     |  |
| 0.3-0.5     |  |
| 0.5-0.7     |  |
| 0.7-0.8     |  |
| 0.8-0.86    |  |
| 0.86-0.89   |  |
| >0.89       |  |

**The predicted NLS(s) (score cutoff = 0.5)**

| Protein ID | Predicted NLS | Start | Stop | The highest score of matches within the prediction |
|------------|---------------|-------|------|----------------------------------------------------|
| Clock      | KKRR          | 44    | 47   | 0.862                                              |
| Clock      | SCSKMSSIVDR   | 6     | 16   | 0.522                                              |

**ELM** cutoff 100

No positive NLS result

TRG\_NES\_CRM1\_1 7.626e-04

546-561

547-561

## NES Finder

Position NES Type

=====

507 IPQGMSQFQF 3-2-1

548 LRKIQEQLQM 2-3-1

588 NIQQLAPINM 2-2-1

## LocNES

| Protein Name        | Position | Sequence        | Score |
|---------------------|----------|-----------------|-------|
| >LocNES1255047839_0 | 50-64    | RRDQFNVLIELGSM  | 0.139 |
| >LocNES1255047839_0 | 111-125  | NEEFTQLMLEALDGF | 0.373 |
| >LocNES1255047839_0 | 113-127  | EFTQLMLEALDGFFL | 0.290 |
| >LocNES1255047839_0 | 115-129  | TQLMLEALDGFFLAI | 0.612 |
| >LocNES1255047839_0 | 131-145  | TDGSIIYVSESVTSL | 0.015 |
| >LocNES1255047839_0 | 247-261  | PSYEDRVCFVATVRL | 0.059 |
| >LocNES1255047839_0 | 259-273  | VRLATPQFIKEMCTV | 0.038 |
| >LocNES1255047839_0 | 292-306  | FLDHRAPPIIGYLPF | 0.030 |
| >LocNES1255047839_0 | 414-428  | NRINTVSLKEALERF | 0.119 |
| >LocNES1255047839_0 | 497-511  | SLTQPVMSQATNLPI | 0.062 |
| >LocNES1255047839_0 | 506-520  | ATNLPIPQGMSQFQF | 0.056 |
| >LocNES1255047839_0 | 547-561  | RQQEELRKIQEQLQM | 0.122 |
| >LocNES1255047839_0 | 548-562  | QQEELRKIQEQLQMV | 0.103 |
| >LocNES1255047839_0 | 571-585  | LQQSNPGLNFGSVQL | 0.050 |
| >LocNES1255047839_0 | 587-601  | SGNSSNIQQLAPINM | 0.073 |
| >LocNES1255047839_0 | 657-671  | TQSTLTAPLYNTMVI | 0.047 |
| >LocNES1255047839_0 | 721-735  | PVACGAVMVPSTMLM | 0.029 |
| >LocNES1255047839_0 | 798-812  | GNPSTQLILSAAFPL | 0.136 |

## NetNES 1.1 Server - prediction results

---

>Sequence - NetNES 1.1 prediction

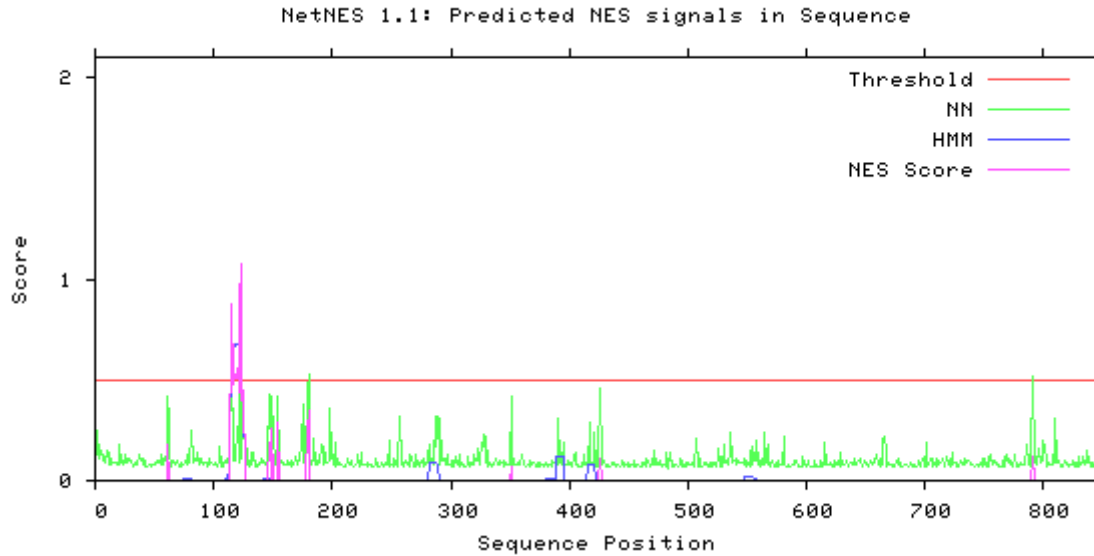

## hNPAS1

>sp|Q99742|NPAS1\_HUMAN Neuronal PAS domain-containing protein 1 OS=Homo sapiens OX=9606 GN=NPAS1 PE=2 SV=2

MAAPYPGSGGGSEVKCVGGRGASVPWDFLPGLMVKAPSGPCLQAQRKEKS RNAARSRRGK  
 ENLEFFELAKLLPLPGAISSQLDKASIVRLSVTYLRLRRFAALGAPPWGLRAAGPPAGLA  
 PGRRGPAALVSEVFEQHLGGHILQSLDGFVFALNQEGKFLYISETVSIYLGLSQVEMTGS  
 SVFDYIHPGDHSEVLEQLGLRTPPTPGPPTPPSVSSSSSSSSSLADTPEIEASLTKVPPSS  
 LVQERSFFVRMKSTLTKRGLHVKASGYKVIHVTGRLRAHALGLVALGHTLPPAPLAELPL  
 HGHMIVFRLSLGLTILACESRVSDHMDLGPSELVGRSCYQFVHGQDATRIRQSHVDLLDK  
 GQVMTGYRRLQVRAGGFVWLQSVATVAGSGKSPGEHHVLWVSHVLSQAEGGQTPLDAFQL  
 PASVACEEASSPGPEPTEPEPPTGKQAAPAEAEAPQTQKKRIKVEPGPRETKGSEDSGD  
 EDPSSHPATPRPEFTSVIRAGVLKQDPVRPWGLAPPGDPPPTLLHAGFLPPVVRGLCTPG  
 TIRYGAELGLVYPHLQRLGPGPALPEAFYPPLGLPYPGPAGTRLPRKGD

## cNLS Mapper Result cut-off 2.0

| Predicted NLSs in query sequence                   |     |
|----------------------------------------------------|-----|
| MAAPYPGSGGGSEVKCVGGRGASVPWDFLPGLMVKAPSGPCLQAQRKEKS | 50  |
| RNAARSRRGKENLEFFELAKLLPLPGAISSQLDKASIVRLSVTYLRLRRF | 100 |
| AALGAPPWGLRAAGPPAGLAPGRRGPAALVSEVFEQHLGGHILQSLDGFV | 150 |
| FALNQEGKFLYISETVSIYLGLSQVEMTGSSVFDYIHPGDHSEVLEQLGL | 200 |
| RTPTPGPPTPPSVSSSSSSSSSLADTPEIEASLTKVPPSSLVQERSFFVR | 250 |
| MKSTLTKRGLHVKASGYKVIHVTGRLRAHALGLVALGHTLPPAPLAELPL | 300 |
| HGHMIVFRLSLGLTILACESRVSDHMDLGPSELVGRSCYQFVHGQDATRI | 350 |
| RQSHVDLLDKGQVMTGYRRLQVRAGGFVWLQSVATVAGSGKSPGEHHVLW | 400 |
| VSHVLSQAEGGQTPLDAFQLPASVACEEASSPGPEPTEPEPPTGKQAAP  | 450 |
| AENEAPQTQKKRIKVEPGPRETKGSEDSGDEDPSSHPATPRPEFTSVIRA | 500 |
| GVLKQDPVRPWGLAPPGDPPPTLLHAGFLPPVVRGLCTPGTIRYGAELG  | 550 |
| LVYPHLQRLGPGPALPEAFYPPLGLPYPGPAGTRLPRKGD           | 590 |

| Predicted monopartite NLS |          |       |
|---------------------------|----------|-------|
| Pos.                      | Sequence | Score |
|                           |          |       |

| Predicted bipartite NLS |                                    |       |
|-------------------------|------------------------------------|-------|
| Pos.                    | Sequence                           | Score |
| 33                      | MVKAPSGPCLQAQRKEKSRNAARSRRGKE      | 3.1   |
| 45                      | QRKEKSRNAARSRRGKENLEFFELAKLLP      | 2.5   |
| 46                      | RKEKSRNAARSRRGKENLEFFELAKLLPLP     | 2.4   |
| 46                      | RKEKSRNAARSRRGKENLEFFELAKLLPLP     | 2.4   |
| 51                      | RNAARSRRGKENLEFFELAKLLPLPGAISSQLDK | 2.3   |
| 55                      | RSRRGKENLEFFELAKLLPLPGAISSQLDKASI  | 2.9   |
| 89                      | RLSVTYLRLRRFAALGAPPWGLRAAGPPAGLAPG | 2.2   |
| 96                      | RLRRFAALGAPPWGLRAAGPPAGLAPGRRGP    | 2     |
| 230                     | EASLTKVPPSSLVQERSFFVRMKSTLTKRGLH   | 3.3   |
| 245                     | RSFFVRMKSTLTKRGLHVKASGYKVIHVTGRLRA | 2.7   |
| 250                     | RMKSTLTKRGLHVKASGYKVIHVTGRLRAHALGL | 3     |
| 458                     | TQGKRIKVEPGPRETKGSEDSGDEDPSSHP     | 2.2   |

## NLStradamus

Posterior cutoff 0.1

33 - MVKAPSGPCLQAQRKEKSRNAARSRRGKENLEFFELAKLLPLPG - 76

96 - RLRRFAALGAPPWGLRAAGPPAGLAPGRRGPAA - 128

258 - RG - 259

456 - PQTQGKRIKVEPGPRETKGS - 475

579 - GPAGTRLPRKGD - 590

## NucPred

The NucPred score for your sequence is 0.22 (see [score help](#) below)

|     |                                                    |     |
|-----|----------------------------------------------------|-----|
| 1   | MAAPYPGSGGGSEVKCVGGRGASVPWDFLPGLMVKAPSGPCLQAQRKEKS | 50  |
| 51  | RNAARSRRGKENLEFFELAKLLPLPGAISSQLDKASIVRLSVTYLRLRRF | 100 |
| 101 | AALGAPPWGLRAAGPPAGLAPGRRGPAALVSEVFEQHLGGHILQSLDGFV | 150 |
| 151 | FALNQEGKFLYISETVSIYLGLSQVEMTGSSVFDYIHPGDHSEVLEQLGL | 200 |
| 201 | RTPTPGPPTPPSVSSSSSSSSSLADTPEIEASLTKVPPSSLVQERSFFVR | 250 |
| 251 | MKSTLTKRGLHVKASGYKVIHVTGRLRAHALGLVALGHTLPPAPLAELPL | 300 |
| 301 | HGHMIVFRLSLGLTILACESRVSDHMDLGPSELVGRSCYQFVHGQDATRI | 350 |
| 351 | RQSHVDLLDKGQVMTGYRRLQAGGFVWLQSVATVAGSGKSPGEHHVLW   | 400 |
| 401 | VSHVLSQAEGGQTPLDAFQLPASVACEEASSPGPEPTEPEPPTEGKQAAP | 450 |
| 451 | AENEAPQTQGKRIKVEPGPRETKGSEDSGDEDPSSHPATPRPEFTSVIRA | 500 |
| 501 | GVLKQDPVRPWGLAPPDPPPTLLHAGFLPPVVRGLCTPGTIRYGPaelG  | 550 |
| 551 | LVYPHLQRLGPGPALPEAFYPPLGLPYPGPAGTRLPRKGD           | 590 |



Positively and negatively influencing subsequences are coloured according to the following scale:

(non-nuclear) negative  positive

## PSORTII

[NUCDISC: discrimination of nuclear localization signals](#)

```
pat4: none
pat7: none
bipartite: none
content of basic residues: 9.7%
NLS Score: -0.47
```

## SeqNLS

**Prediction result (The predicted NLS(s) are underlined)**

Npas1: MAAPYPGSGGGSEVKCVGGRGASVPWDFLPGLMVKAPSGPCLQAQRKEKSRNAARSRRGK

**Definition of different colors in predictions**

| score range | color                                                                               |
|-------------|-------------------------------------------------------------------------------------|
| 0.1-0.3     |  |
| 0.3-0.5     |  |
| 0.5-0.7     |  |
| 0.7-0.8     |  |
| 0.8-0.86    |  |
| 0.86-0.89   |  |
| >0.89       |  |

**The predicted NLS(s) (score cutoff = 0.3)**

| Protein ID | Predicted NLS | Start | Stop | The highest score of matches within the prediction |
|------------|---------------|-------|------|----------------------------------------------------|
| Npas1      | CLQAQRKEK     | 41    | 49   | 0.447                                              |
| Npas1      | NAARSRRGK     | 52    | 60   | 0.351                                              |

**ELM** score 100

TRG\_NLS\_MonoExtC\_3 7.252e-04

GKRIKVE 460-466

Monopartite variant of the classical basically charged NLS. C-extended version.

No positive NES result

## NES Finder

Position NES Type

=====

|     |            |       |
|-----|------------|-------|
| 65  | FFELAKLLPL | 2-3-1 |
| 88  | VRLSVTYLRL | 3-2-1 |
| 300 | LHGHMIVFRL | 3-2-1 |
| 304 | MIVFRLSLGL | 2-3-1 |
| 306 | VFRLSLGLTI | 2-3-1 |

## LocNES

| Protein Name       | Position | Sequence        | Score |
|--------------------|----------|-----------------|-------|
| >LocNES859122758_0 | 24-38    | RGASVPWDFLPGLMV | 0.049 |
| >LocNES859122758_0 | 64-78    | KENLEFFELAKLLPL | 0.245 |
| >LocNES859122758_0 | 80-94    | GAISSQLDKASIVRL | 0.123 |
| >LocNES859122758_0 | 82-96    | ISSQLDKASIVRLSV | 0.095 |
| >LocNES859122758_0 | 85-99    | QLDKASIVRLSVTYL | 0.215 |
| >LocNES859122758_0 | 87-101   | DKASIVRLSVTYLRL | 0.295 |
| >LocNES859122758_0 | 90-104   | SIVRLSVTYLRLRRF | 0.143 |
| >LocNES859122758_0 | 141-155  | HLGGHILQSLDGFVF | 0.026 |
| >LocNES859122758_0 | 143-157  | GGHILQSLDGFVFAL | 0.035 |
| >LocNES859122758_0 | 158-172  | NQEGKFLYISETVSI | 0.024 |
| >LocNES859122758_0 | 160-174  | EGKFLYISETVSIYL | 0.012 |
| >LocNES859122758_0 | 162-176  | KFLYISETVSIYLGL | 0.037 |
| >LocNES859122758_0 | 165-179  | YISETVSIYLGLSQV | 0.005 |
| >LocNES859122758_0 | 167-181  | SETVSIYLGLSQVEM | 0.024 |
| >LocNES859122758_0 | 226-240  | SLADTPEIEASLTKV | 0.011 |
| >LocNES859122758_0 | 273-287  | VIHVTGRLRAHALGL | 0.780 |
| >LocNES859122758_0 | 276-290  | VTGRLRAHALGLVAL | 0.235 |
| >LocNES859122758_0 | 290-304  | LGHTLPPAPLAELPL | 0.200 |
| >LocNES859122758_0 | 296-310  | PAPLAELPLHGHMIV | 0.144 |
| >LocNES859122758_0 | 299-313  | LAELPLHGHMIVFRL | 0.083 |
| >LocNES859122758_0 | 301-315  | ELPLHGHMIVFRLSL | 0.190 |
| >LocNES859122758_0 | 303-317  | PLHGHMIVFRLSLGL | 0.093 |
| >LocNES859122758_0 | 305-319  | HGHMIVFRLSLGLTI | 0.139 |
| >LocNES859122758_0 | 306-320  | GHMIVFRLSLGLTIL | 0.211 |
| >LocNES859122758_0 | 410-424  | SQAEGGQTPLDAFQL | 0.029 |

|                    |         |                 |       |
|--------------------|---------|-----------------|-------|
| >LocNES859122758_0 | 526-540 | TLLHAGFLPPVVRGL | 0.074 |
| >LocNES859122758_0 | 549-563 | GPAELGLVYPHLQRL | 0.057 |
| >LocNES859122758_0 | 565-579 | PGPALPEAFYPPLGL | 0.038 |

## NetNES 1.1 Server - prediction results

>Sequence - NetNES 1.1 prediction

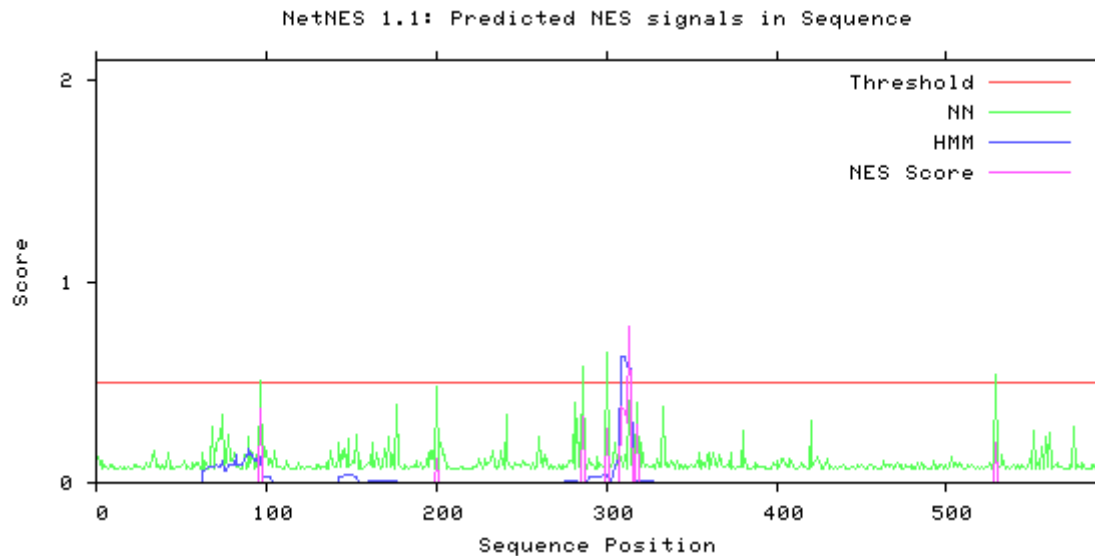

## hNPAS2

```
>sp|Q99743|NPAS2_HUMAN Neuronal PAS domain-containing protein 2 OS=Homo
sapiens OX=9606 GN=NPAS2 PE=1 SV=3
MDEDEKDRAKRASRNKSEKKRRDQFNVLIKELSSMLPGNTRKMDKTTVLEKVIQFLQKHN
EVSQAQTEICDIQQDWKPSFSLNNEFTQLMLEALDGFIIAVTTDGSIIYVSDSITPLLGH
PSDVMDQNLNLFLEQEHSEVYKILSSHMLVTDSPSPEYLKSDSDLEFYCHLLRGSINPK
EFPTYEYIKFVGNFRSYNNVPSPCNGFDNTLSRPCRVPPLGKEVCFIATVRLATPQFLKE
MCIVDEPLEEFTSRHSLEWKFLFLDHRAPPIIGYLPFEVLGTSGYDYYHIDDLELLARCH
QHLMQFGKGKSCCYRFLTKGQQWIWLQTHYYITYHQWNSKPEFIVCTHSVVSADVRVER
RQELALEDPPEALHSSALKDKGSSLEPRQHFNTLDVGASGLNTSHSPSASSRSSHKSSH
TAMSEPTSTPTKLMAEASTPALPRSATLPQELPVPGLSQAATMPAPLPSPSSCDLTQQLL
PQTVLQSTPAPMAQFSAQFSMFQTIKDQLEQRTRILQANIRWQQEELHKIQEQCLVQDS
NVQMFLQQPAVLSFSSTQRPEAQQLQQRSAAVTQPQLGAGPQLPGQISSAQVTSQHLL
RESSVISTQGPKPMRSSQLMQSSGRSGSSLVSPFSSATAALPPSLNLTTPASTSQDASQC
QPSPDFSHDRQLRLLLSQPIQPMMPGSCDARQPSEVSRTRGRQVKYASQQTVPQNPDAHPA
NSSAPMPVLLMGQAVLHPSFPASQPSPLQPAQARQQPPQHLYLQVQAPTS LHSEQQDSLL
LSTYSQQPGTLGYPPPPAQPPQLRPFRVSSLSSESSGLQQPPR
```

**cNLS Mapper Result cut-off score 2.0**

| Predicted NLSs in query sequence |                                             |     |
|----------------------------------|---------------------------------------------|-----|
| MDEDEKDRAK                       | RASRNKSEKKRRDQFNVL                          | 50  |
| KVIGFLQKHNEVSAQTEICDIQD          | WKPSFLSNEEFTQLMLEALDGFIIAV                  | 100 |
| TTDGSIIYVSDSITPLLGHLP            | SDVMDQNLLNFLPEQEHSEVYKILSSHML               | 150 |
| VTDSPSPEYLKSDSDLEFYCHLLRGS       | LNPKFPTYEYIKFVGNFRSYNNV                     | 200 |
| PSPSCNGFDNTLSRPCR                | VPLGKEVCFIATVRLATPQFLKEMCIVDEPLEE           | 250 |
| FTSRHSLEWKFLFLD                  | HRAPPIIGYLPFEVLGTSGYDYYHIDDLELLARCH         | 300 |
| QHLMQFGKGKSCCYRFLTKGQ            | QWIWLQTHYYITYHQWNSKPEFIVCTHSV               | 350 |
| VSYADVRVERRQELALEDP              | PPSEALHSSALKDKGSSLEPRQHFNTLDVGAS            | 400 |
| GLNTSHS                          | PSASSRSSHKSSHTAMSEPTSTPTKLM                 | 450 |
| ELPVPGLSQAATMPAPLP               | SPSSCDLTQQLLPQTVLQSTPAPMAQFSAQFS            | 500 |
| MFQTIKDQLEQ                      | RTRILQANIRWQQEELHKIQEQLCLVQDSNVQMFLQQPA     | 550 |
| VSLSFSS                          | TQRPAAQQQLQQRSAAVTQPOLGAGPQLPGQISSAQVTSQHLL | 600 |
| RESSVISTQGPKPMR                  | SSQLMQSSGRSGSSLVSPFSSATAALPPSLNLTP          | 650 |
| ASTSQDASQCQ                      | PSPDFSHDRQLRLLLSQPIQPMMPGSCDARQPSEVSRTG     | 700 |
| RQVKYAQSQT                       | VFQNPDAHPANSSAPMPVLLMGQAVLHPSFPASQPSPLQ     | 750 |
| PAQARQQPPQH                      | YLQVQAPTSLHSEQQDSLSTYSQQPGTLGYPPPPAQ        | 800 |
| PQPLRPPRRV                       | SSLSESSGLQQPPR                              | 824 |

| Predicted monopartite NLS |          |       |
|---------------------------|----------|-------|
| Pos.                      | Sequence | Score |
|                           |          |       |

| Predicted bipartite NLS |                                     |       |
|-------------------------|-------------------------------------|-------|
| Pos.                    | Sequence                            | Score |
| 11                      | RASRNKSEKKRRDQFNVL                  | 2.2   |
| 11                      | RASRNKSEKKRRDQFNVL                  | 3.6   |
| 14                      | RNKSEKKRRDQFNVL                     | 2.7   |
| 14                      | RNKSEKKRRDQFNVL                     | 7.3   |
| 14                      | RNKSEKKRRDQFNVL                     | 3.2   |
| 192                     | GNFRSYNNVPS                         | 2     |
| 214                     | RPCR                                | 3.4   |
| 227                     | IATVRLATPQFLKEMCIVDEPLEEFTSRHSLE    | 2     |
| 231                     | RLATPQFLKEMCIVDEPLEEFTSRHSLEWKFLFLD | 3.7   |
| 231                     | RLATPQFLKEMCIVDEPLEEFTSRHSLEWKFLFLD | 2.6   |
| 379                     | LKDKGSSLEPRQHFNTLDVGASGLNTSHS       | 2.1   |
| 502                     | FQTIKDQLEQ                          | 2.2   |
| 669                     | DRQLRLLLSQPIQPMMPGSCDARQPSEVSRT     | 2     |
| 698                     | RTGRQVKYAQSQT                       | 2.5   |

NLStradamus

|                               |     |
|-------------------------------|-----|
| 4 - DEKDRAKRASRNKSEKKRRDQFNVL | 46  |
| 803 - PLRPPRRVSSLSES          | 816 |
| 821 - QPPR                    | 824 |

## NucPred

The NucPred score for your sequence is 0.89 (see [score help](#) below)

```
1  MDEDEKDRAKRASRNKSEKKRRDQFNVLIELSSMLPGNTRKMDKTTVLE 50
51  KVIGFLQKHNEVSAQTEICDIQQDWKPSFLSNEEFTQLMLEALDGFIIAV 100
101 TTDGSIIYVSDSITPLLGHLPDVMQDNLNLFPEQEHSEVYKILSSHML 150
151 VTDSPSPPEYLKSDSDLEFYCHLLRGSINPKFPTYEYIKFVGNFRSYNNV 200
201 PSPSCNGFDNTLSRPCRVPPLGKEVCFIATVRLATPQFLKEMCIVDEPLEE 250
251 FTSRHSLEWKFLFLDHRAPPIIGYLPFEVLGTSGYDYYHIDDELLARCH 300
301 QHLMQFGKGKSCCYRFLTKGQQWIWLQTHYYITYHQWNSKPEFIVCTHSV 350
351 VSYADVRRERQELALEDPPEALHSSALKDKGSSLEPRQHFNLTLDVGAS 400
401 GLNTSHSPSASSRSSHKSHTAMSEPTSTPTKLMAEASTPALPRSATLPQ 450
451 ELPVPGLSQAATMPAPLPSPSSCDLTQQLLPQTVLQSTPAPMAQFSAQFS 500
501 MFQTIKDQLEQRTIRILOANIRWQEEELHKIQEQCLVQDSNVQMFLQOPA 550
551 VSLFSSTQRPAAQQQLQORSAAVTQPQLGAGPQLPGQISSAQVTSQHLL 600
601 RESSVISTQGPKPMRSSQLMQSSGRSGSSLVSPFSSATAALPPSLNLTP 650
651 ASTSQDASQCQSPDFSHDRQLRLLLSQPIQPMMPGSCDARQPSVSRTE 700
701 RQVKYAQSQTTFQNPDAHPANSSSAPMPVLLMGQAVLHPSFPASQPSPLQ 750
751 PAQARQPPQHYLQVQAPTSLSHSEQQDSLLLSTYSQQPGTLGYPPPPAQ 800
801 PQPLRPPRRVSSLSESSGLQQPPR 824
```

Positively and negatively influencing subsequences are coloured according to the following scale:

(non-nuclear) negative ||||| positive (nuclear)

## PSORTII

[NUCDISC: discrimination of nuclear localization signals](#)

```
pat4: KKRR (5) at 19
pat7: none
bipartite: none
content of basic residues: 8.4%
NLS Score: -0.16
```

**SeqNLS** cut-off 0,5

**Prediction result (The predicted NLS(s) are underlined)**

Npas2: MDEDEKDRAKRASRNKSEKKRRDQFNVLIELSSMLPGNTRKMDKTTVLEKVIGFLQKHN

**Definition of different colors in predictions**

| score range | color |
|-------------|-------|
| 0.1-0.3     |       |
| 0.3-0.5     |       |
| 0.5-0.7     |       |
| 0.7-0.8     |       |
| 0.8-0.86    |       |
| 0.86-0.89   |       |
| >0.89       |       |

The predicted NLS(s) (score cutoff = 0.5)

| Protein ID | Predicted NLS | Start | Stop | The highest score of matches within the prediction |
|------------|---------------|-------|------|----------------------------------------------------|
| Npas2      | KKRR          | 19    | 22   | 0.873                                              |

**ELM** cut-off 100 and 50

No NLS positive result

TRG\_NES\_CRM1\_1          7.626e-04          525-539; 526-539

## NES Finder

| Position | NES        | Type  |
|----------|------------|-------|
| =====    | =====      | ===== |
| 492      | MAQFSAQFSM | 2-3-1 |
| 527      | LHKIQEQLCL | 2-3-1 |

## LocNES

| Protein Name       | Position | Sequence         | Score |
|--------------------|----------|------------------|-------|
| >LocNES271820630_0 | 25-39    | RRDQFNVLIELSSM   | 0.348 |
| >LocNES271820630_0 | 45-59    | RKMDKTTVLEKVIGF  | 0.027 |
| >LocNES271820630_0 | 46-60    | KMDKTTVLEKVIGFL  | 0.133 |
| >LocNES271820630_0 | 86-100   | NEEFTQLMLEALDGF  | 0.373 |
| >LocNES271820630_0 | 88-102   | EFTQLMLEALDGFII  | 0.398 |
| >LocNES271820630_0 | 90-104   | TQLMLEALDGFIIAV  | 0.172 |
| >LocNES271820630_0 | 106-120  | TDGSIIYVSDSITPL  | 0.010 |
| >LocNES271820630_0 | 141-155  | EHSEVYKILSSHMLV  | 0.018 |
| >LocNES271820630_0 | 222-236  | VPLGKEVCFIATVRL  | 0.054 |
| >LocNES271820630_0 | 233-247  | TVRLATPQFLKEMCI  | 0.010 |
| >LocNES271820630_0 | 234-248  | VRLATPQFLKEMCIV  | 0.019 |
| >LocNES271820630_0 | 241-255  | FLKEMCIVDEPLEEF  | 0.006 |
| >LocNES271820630_0 | 267-281  | FLDHRAPPIIGYLPF  | 0.034 |
| >LocNES271820630_0 | 485-499  | PQTVLQSTPAPMAQF  | 0.044 |
| >LocNES271820630_0 | 491-505  | STPAPMAQFSAQFSM  | 0.033 |
| >LocNES271820630_0 | 492-506  | TPAPMAQFSAQFSMF  | 0.029 |
| >LocNES271820630_0 | 526-540  | WQQEELHKKIQEQLCL | 0.150 |
| >LocNES271820630_0 | 527-541  | QQEELHKKIQEQLCLV | 0.030 |
| >LocNES271820630_0 | 545-559  | NVQMFLQQPAVSLSF  | 0.187 |
| >LocNES271820630_0 | 637-651  | PFSSATAALPPSLNL  | 0.055 |
| >LocNES271820630_0 | 722-736  | HPANSSSAPMPVLLM  | 0.022 |

# NetNES 1.1 Server - prediction results

>Sequence - NetNES 1.1 prediction

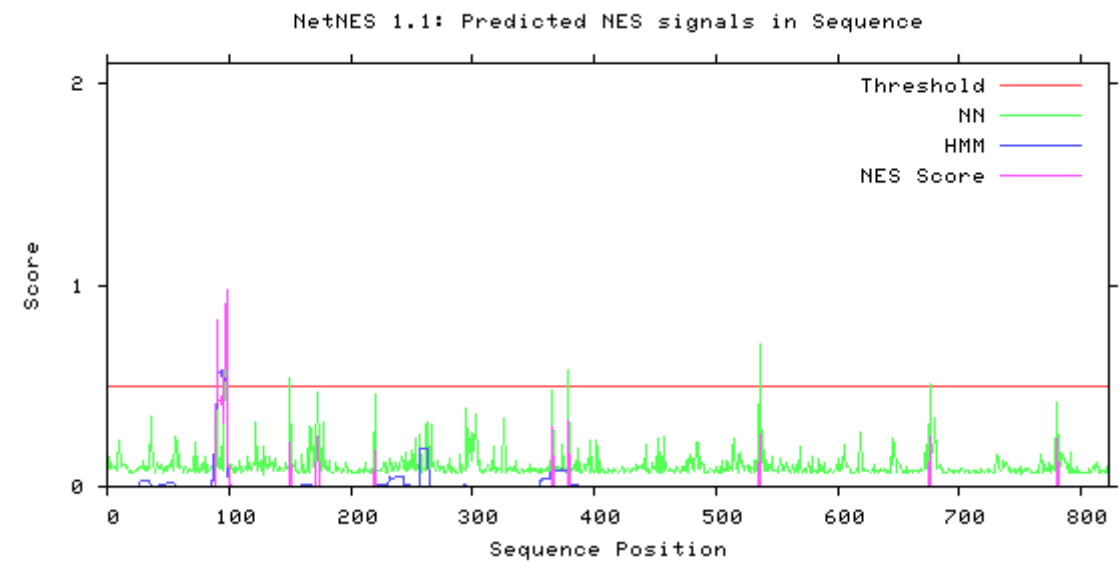

## hNPAS3

>sp|Q8IXF0|NPAS3\_HUMAN Neuronal PAS domain-containing protein 3 OS=Homo sapiens OX=9606 GN=NPAS3 PE=2 SV=1  
MAPTKPSFQQDPSRRERITAQHPLPNQSECRKIYRYDGIYCESTYQNLQALRKEKSRDAA  
RSRRGKENFEFYELAKLLPLPAAITSQLDKASIIRLTISYLMRDFANQGDPPWNLRMEG  
PPPNTSVKVGIAQRRRSPSALAIEVFEAHLGSHILQSLDGFVFALNQEGKFLYISETVSI  
YLGLSQVELTGSSVFDYVHPGDHVEMAEQLGMKLPPGRGLLSQGTAEDGASSASSSSQSE  
TPEPVESTSPSLLTDDNTLERSFFIRMKSTLTGRGVHIKSSGYKVIHITGRLRLRVSLSH  
GRTVPSQIMGLVVVAHALPPPTINEVRIDCHMFVTRVNMDLNIIYCENRISDYMDLTPVD  
IVGKRCYHFIHAEDVEGIRHSHLDLLNKGQCVTKYYRWMQKNGGYIWIQSSATIINAKN  
ANEKNIIWVNYLLSNPEYKDTMPDIAQLPHLPEKTSESSESSESSESSESSESSESSESSES  
SKSDEKGNQSENSEDPEPDRKKSGNACDNDMNCNDGDHSSSNPDSRDSDDSFHSDFFENP  
KAGEDGFGALGAMQIKVERYVESEDLRLQNCESLTSDSAKSDSAGEAGAQAASSKHQKR  
KKRRKRQKGGASRRRLSSASSPGGLDAGLVEPPRLSSPNSASVLKIKTEISEPINFDN  
DSSIWNYPNREISRNEPYSMTKPPSEHFPSPQGGGGGGGGGGGLHVAIPDSVLTTPPG  
ADGAAARKTQFGASATAALAPVASDPLSPPLSASPRDKHPNGGGGGGGGGGGAGGGGPPSA  
SNSLLYTGDLEALQRLQAGNVVLPLVHRVTGTLAATSTAAQRVYTTGTIRYAPAEVTLAM  
QSNLLPNAHAVNFVDVNSPGFGLDPKTPMEMLYHHVHRLNMSGPFGGAVSAASLTQMPAG  
NVFTTAEGFLFSTLPFPVYSNGIHAAQTLEKED

## cNLS Mapper Result 2.0

| Predicted NLSs in query sequence                   |     |
|----------------------------------------------------|-----|
| MAPTKPSFQQDPSRRERITAQHPLPNQSECRKIYRYDGIYCESTYQNLQA | 50  |
| LRKEKSRDAARSRRGKENFEFYELAKLLPLPAAITSQLDKASIIRLTISY | 100 |
| LKMRDFANQGDPPWNLRMEGPPPNTSVKVGIAQRRRSPSALAIEVFEAHL | 150 |

**GSHILQSLDGFV**FALNQEGKFLYISETVSIYLGLSQVELTGSSVFDYVHP 200  
 GDHVEMAEQLGMKLPPGRGLLSQGTAE DGASSASSSSQSETPPEVESTSP 250  
 SLLTTDNTLE**RSFFIRMKSTLTKRGVHIKSSGYKVIHITGRLRLRVSL**SH 300  
 GRTVPSQIMGLVVVAHALPPPTINEVRIDCHMFVTRVNMDLNIICYENRI 350  
 SDYMDLTPV**DIVGKRCYHFIHAEDVEGIRHSHLDLLNKGQCVTKYYRWMQ** 400  
**KNGGYIWIQSSATIAINAKN**ANEKNI I WVN YLLSNPEYKDT PMDIAQLPH 450  
 LPEKTSESSETSDES EDSKDTSGITEDNENSKSDEKGNQSENSEDP**EPDR** 500  
**KKSGNACDNDMNCNDDGHSSSNPDSRDS**DDSF EHSDFENPKAGEDGFGAL 550  
 GAMQIKVERYVESESDLRLQNCESLTS**DSAKDSDSAGEAGA QASSKHQKR** 600  
**KKRRKRQKGGASRRRLSSASSPGGLDAGLVEPPRLSSPNSASVLKIKT** 650  
**EISEPINFNDNDSSIWNYPNREISR**NESPYSM TKPPSSEHFSPQGGGGG 700  
**GGGGGGLHVAIPDSVLT**PPGADGAAARKT**QFGASATAALAPVASDPLSP** 750  
**LSASPRDKHPGNGGGGGGGGGAGGGGPSASNSLLYTGDLEALQRLQAGN** 800  
 VVLPLVHRVTGTLAATSTAAQRVYTTGTIRYAPAEVTLAMQSNLLPNAHA 850  
 VNFVDVNSPGFGLDPKTPMEMLYHHVHRLNMSGPFGGAVSAASLTQMPAG 900  
 NVFTTAEGLFSTLPFPVYSNGIHAAQTLEKED 933

### Predicted monopartite NLS

| Pos. | Sequence          | Score     |
|------|-------------------|-----------|
| 596  | KHQKRKKRR         | 2.5       |
| 596  | KHQKRKKRRK        | 4         |
| 597  | <b>HQKRKKRRKR</b> | <b>10</b> |
| 599  | KRKKRRKRQ         | 8         |
| 598  | QKRKKRRKRQ        | 6         |
| 599  | KRKKRRKRQK        | 10        |
| 600  | RKKRRKRQKGG       | 9         |

### Predicted bipartite NLS

| Pos. | Sequence                                 | Score      |
|------|------------------------------------------|------------|
| 3    | PTKPSFQQDPSSRRERIT AQHPLPNQSECRK         | 2.1        |
| 29   | <b>ECRKIYRYDGIYCESTYQN LQALRKEKSRD</b>   | <b>3.4</b> |
| 51   | LRKEKSRDAARSRRGKENFEFYELAKLLP            | 2.6        |
| 57   | RDAARSRRGKENFEFYELAKLLPLPAAITSQ LDK      | 2.2        |
| 61   | RSRRGKENFEFYELAKLLPLPAAITSQ LDKASI       | 2.3        |
| 95   | RLTISYLMRDFANQGDPPWNLRM EGPPPTS V        | 2          |
| 130  | <b>IGAQRRRSPSALAIEVF EAHLGSHILQSLDG</b>  | <b>3</b>   |
| 261  | RSFFIRMKSTLTKRGVHIKSSGYKVIHITGRLRL       | 2.6        |
| 266  | RMKSTLTKRGVHIKSSGYKVIHITGRLRLRVSL        | 2.2        |
| 266  | <b>RMKSTLTKRGVHIKSSGYKVIHITGRLRLRVSL</b> | <b>2.7</b> |
| 360  | <b>DIVGKRCYHFIHAEDVEGIRHSHLDLLNKG</b>    | <b>2.5</b> |
| 374  | DVEGIRHSHLDLLNKGQCVTKYYRWMQKNGGYI        | 2          |
| 392  | VTKYRWMQKNGGYIWIQSSATIAINAKN             | 2          |
| 497  | <b>EPDRKKSGNACDNDMNCNDDGHSSSNPDSRDS</b>  | <b>2</b>   |
| 578  | <b>DSAKDSDSAGEAGA QASSKHQKRKKRRKRQK</b>  | <b>3.9</b> |
| 596  | KHQKRKKRRKRQKGGASRRRLSSASSPGG            | 2.1        |
| 600  | RKKRRKRQKGGASRRRLSSASSPGGLDAGLVE         | 2.6        |
| 606  | RQKGGASRRRLSSASSPGGLDAGLVEPPRLSSP        | 4.2        |
| 606  | <b>RQKGGASRRRLSSASSPGGLDAGLVEPPRLSSP</b> | <b>5.1</b> |
| 614  | RRRLSSASSPGGLDAGLVEPPRLSSP               | 2.3        |
| 614  | RRRLSSASSPGGLDAGLVEPPRLSSP               | 3.3        |
| 614  | RRRLSSASSPGGLDAGLVEPPRLSSPNS             | 2.7        |
| 645  | <b>VLKIKTEISEPINFNDNDSSIWNYPNREIS</b>    | <b>3.2</b> |
| 649  | KTEISEPINFNDNDSSIWNYPNREISR              | 2.7        |



|            |                                                                  |          |
|------------|------------------------------------------------------------------|----------|
| 682<br>727 | MTKPPSSEHFSPQGGGGGGGGGGLHVAI<br>RKTQFGASATAALAPVASDPLSPPLSASP635 | 2<br>3.6 |
|------------|------------------------------------------------------------------|----------|

## NLSstradamus cut-off 0,1

|                 |                                                                       |
|-----------------|-----------------------------------------------------------------------|
| Viterbi Path    | 596 - KHQKRKKRRKRQKGGASRRR - 616                                      |
| Posterior @ 0.1 | 44 - TYQNLQALRKEKSRDAARSRRGKENFEFYELAKLL - 78                         |
|                 | 133 - QRRR - 136                                                      |
|                 | 273 - KR - 274                                                        |
|                 | 582 -<br>DSDSAGEAGAQAASSKHQKRKKRRKRQKGGASRRRLSSASSPGGLDAGLVEPPR - 635 |
|                 | 754 - SPRDKHPGNGGGGGGGGGGA - 773                                      |

## NucPred

The NucPred score for your sequence is 0.96 (see [score help](#) below)

|     |                                                     |     |
|-----|-----------------------------------------------------|-----|
| 1   | MAPTKPSFQODPSRRERITAQHPLPNQSECRKIYRYDGIYCESTYQNLQA  | 50  |
| 51  | LRKEKSRDAARSRRGKENFEFYELAKLLPLPAAITSQLDKASIIRLTISY  | 100 |
| 101 | LKMRDFANQGDPPWNLRMEGPPNPTSVKVIQAQRRRSPSALAIEVFEAHL  | 150 |
| 151 | GSHILQSLDGFVFALNQEGKFLYISETVSIYLGLSQVELTGSSVFDYVHP  | 200 |
| 201 | GDHVEMAEQLGMKLPPGRGLLSQGTAEKGASSASSSSQSETPEPVESTSP  | 250 |
| 251 | SLTTDNTLERSFFIRMKSTLTKRGVHIKSSGYKVIHITGRLRLRVSLSH   | 300 |
| 301 | GRTVPSQIMGLVVVAHALPPPTINEVRIDCHMFVTRVNMDLNIIYCENRI  | 350 |
| 351 | SDYMDLTPVDIVGKRCYHFIHAEDVEGIRHSHLDLLNKGQCVTKYYRWMQ  | 400 |
| 401 | KNGGYIWIQSSATIAINAKNANEKNIWVNYLLSNPEYKDTPMEDIAQLPH  | 450 |
| 451 | LPEKTSESSETSDSESDDKDTSGITEDNENSKSDEKGNQSENSEDPEPDR  | 500 |
| 501 | KKSGNACDNDMNCNDDGHSSSNPDSRDSDDSFHSDFENPKAGEDGFGAL   | 550 |
| 551 | GAMQIKVERYVESEDLRLQNCESLTSDSAKSDSAGEAGAQAASSKHOKR   | 600 |
| 601 | KKRRKRQKGGASRRRLSSASSPGGLDAGLVEPPRLSSPNSASVLKIKT    | 650 |
| 651 | EISEPINFDNDSSIWNYPNREISRNESPYSMTKPPSSEHFSPQGGGGG    | 700 |
| 701 | GGGGGGLHVAIPDSVLTPPGADGAAARKTQFGASATAALAPVASDPLSP   | 750 |
| 751 | LSASPRDKHPGNGGGGGGGGGGAGGGGPSASNSLLYTGDLALQRLQAGN   | 800 |
| 801 | VVLPLVHRVTGTTLAATSTAAQRVYTTGTIRYAPAEVTLAMQSNLLPNAHA | 850 |
| 851 | VNFVDVNSPGFGLDPKTPMEMLYHHVHRLNMSGPFGGAVSAASLTQMPAG  | 900 |
| 901 | NVFTTAEGLFSTLFPVYSNGIHAAQTLEKED                     | 933 |

Positively and negatively influencing subsequences are coloured according to the following scale:

(non-nuclear) negative  positive (nuclear)

## PSORTII

[NUCDISC: discrimination of nuclear localization signals](#)

```
pat4: KRKK (5) at 599
pat4: RKKR (5) at 600
pat4: KKRR (5) at 601
pat4: KRRK (5) at 602
pat4: RRKR (5) at 603
pat7: PSRRERI (4) at 12
pat7: PEPDRKK (3) at 496
pat7: PDRKKSG (5) at 498
bipartite: RKKRRKRQKGGSASRRR at 600
bipartite: KKRRKRQKGGSASRRRL at 601
bipartite: KRRKRQKGGSASRRRLS at 602
content of basic residues: 10.3%
NLS Score: 3.61
```

## SeqNLS

**Prediction result (The predicted NLS(s) are underlined)**

Npas3: MAPTKPSFQQDPSRRERITAQHPLPNQSECRKIYRYDGIYCESTYQNLQALRKEKSRDAA

**Definition of different colors in predictions**

| score range | color                                                                               |
|-------------|-------------------------------------------------------------------------------------|
| 0.1-0.3     |  |
| 0.3-0.5     |  |
| 0.5-0.7     |  |
| 0.7-0.8     |  |
| 0.8-0.86    |  |
| 0.86-0.89   |  |
| >0.89       |  |

**The predicted NLS(s) (score cutoff = 0.5)**

| Protein ID | Predicted NLS      | Start | Stop | The highest score of matches within the prediction |
|------------|--------------------|-------|------|----------------------------------------------------|
| Npas3      | MAPTKPSFQQDPSRRERI | 1     | 18   | 0.908                                              |

**ELM** cut-off 100

TRG\_NLS\_MonoCore\_2 2.345e-04

|        |         |
|--------|---------|
| QKRKKR | 598-603 |
| KRKKRR | 599-604 |
| RKKRRK | 600-605 |
| KKRRKR | 601-606 |

Monopartite variant of the classical basically charged NLS. Strong core version.

TRG\_NLS\_MonoExtC\_3 7.252e-04

|        |         |
|--------|---------|
| QKRKKR | 598-603 |
| KRKKRR | 599-604 |
| RKKRRK | 600-604 |
| KKRRKR | 601-605 |
| RRKRQK | 603-608 |

Monopartite variant of the classical basically charged NLS. C-extended version.

TRG\_NLS\_MonoExtN\_4 1.276e-03

|          |         |
|----------|---------|
| KHQKRKKR | 596-603 |
| KRKKRRKR | 599-606 |
| RKKRRKR  | 600-606 |
| KKRRKRQK | 601-608 |
| KRRKRQKG | 602-609 |
| RRKRQKG  | 603-609 |
| RKRQKG   | 604-609 |

Monopartite variant of the classical basically charged NLS. N-extended version.

No NES positive results

## NES Finder

| Position | NES        | Type  |
|----------|------------|-------|
| =====    |            |       |
| 71       | FYELAKLLPL | 2-3-1 |
| 94       | IRLTISYLKM | 3-2-1 |
| 285      | VIHITGRLRL | 2-3-1 |
| 334      | VTRVNMDLNI | 2-3-1 |

**LocNES**

| <b>Protein Name</b> | <b>Position</b> | <b>Sequence</b>  | <b>Score</b> |
|---------------------|-----------------|------------------|--------------|
| >LocNES264943790_0  | 70-84           | KENFEFYELAKLLPL  | 0.101        |
| >LocNES264943790_0  | 86-100          | AAITSQLDKASIIRL  | 0.297        |
| >LocNES264943790_0  | 88-102          | ITSQLDKASIIRLTI  | 0.507        |
| >LocNES264943790_0  | 91-105          | QLDKASIIRLTISYL  | 0.318        |
| >LocNES264943790_0  | 93-107          | DKASIIRLTISYLM   | 0.409        |
| >LocNES264943790_0  | 153-167         | HLGSHILQSLDGFVF  | 0.057        |
| >LocNES264943790_0  | 155-169         | GSHILQSLDGFVFAL  | 0.030        |
| >LocNES264943790_0  | 170-184         | NQEGKFLYISETVSI  | 0.027        |
| >LocNES264943790_0  | 172-186         | EGKFLYISETVSIYL  | 0.097        |
| >LocNES264943790_0  | 174-188         | KFLYISETVSIYLLGL | 0.323        |
| >LocNES264943790_0  | 177-191         | YISETVSIYLLGLSQV | 0.052        |
| >LocNES264943790_0  | 179-193         | SETVSIYLLGLSQVEL | 0.127        |
| >LocNES264943790_0  | 202-216         | VHPGDHVEMAEQLGM  | 0.122        |
| >LocNES264943790_0  | 255-269         | SLLTTDNTLERSFFI  | 0.022        |
| >LocNES264943790_0  | 284-298         | SSGYKVIHITGRLRL  | 0.266        |
| >LocNES264943790_0  | 288-302         | KVIHITGRLRLRVSL  | 0.112        |
| >LocNES264943790_0  | 303-317         | SHGRTVPSQIMGLVV  | 0.020        |
| >LocNES264943790_0  | 304-318         | HGRTVPSQIMGLVVV  | 0.012        |
| >LocNES264943790_0  | 318-332         | VAHALPPPTINEVRI  | 0.012        |
| >LocNES264943790_0  | 329-343         | EVRIDCHMFVTRVNM  | 0.014        |
| >LocNES264943790_0  | 331-345         | RIDCHMFVTRVNMDL  | 0.014        |
| >LocNES264943790_0  | 333-347         | DCHMFVTRVNMDLNI  | 0.084        |
| >LocNES264943790_0  | 334-348         | CHMFVTRVNMDLNII  | 0.043        |
| >LocNES264943790_0  | 351-365         | ENRISDYMDLTPVDI  | 0.014        |
| >LocNES264943790_0  | 545-559         | KAGEDGFGALGAMQI  | 0.039        |
| >LocNES264943790_0  | 547-561         | GEDGFGALGAMQIKV  | 0.030        |
| >LocNES264943790_0  | 648-662         | SVLKIKTEISEPINF  | 0.059        |
| >LocNES264943790_0  | 793-807         | DLEALQRLQAGNVVL  | 0.233        |
| >LocNES264943790_0  | 828-842         | YTTGTIRYAPAEVTL  | 0.013        |
| >LocNES264943790_0  | 843-857         | AMQSNLLPNAHAVNF  | 0.022        |
| >LocNES264943790_0  | 846-860         | SNLLPNAHAVNFVDV  | 0.006        |
| >LocNES264943790_0  | 869-883         | PKTPMEMLYHHVHRL  | 0.038        |
| >LocNES264943790_0  | 871-885         | TPMEMLYHHVHRLNM  | 0.079        |
| >LocNES264943790_0  | 903-917         | AGNVFTTAEGLFSTL  | 0.187        |
| >LocNES264943790_0  | 905-919         | NVFTTAEGLFSTLPF  | 0.136        |
| >LocNES264943790_0  | 907-921         | FTTAEGLFSTLPFPV  | 0.020        |

## NetNES 1.1 Server - prediction results

>Sequence - NetNES 1.1 prediction

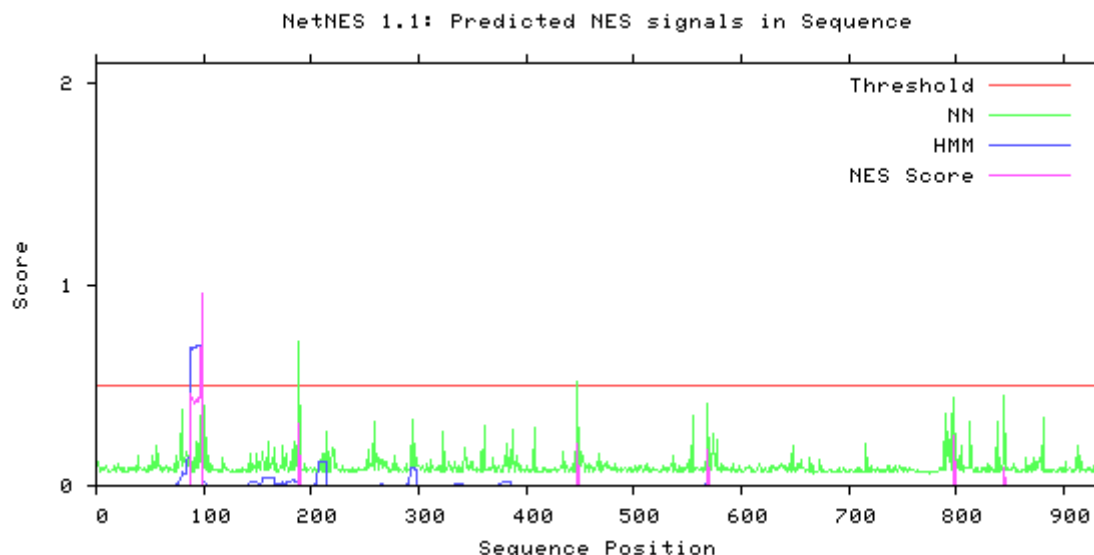

### hNPAS4

>sp|Q8IUM7|NPAS4\_HUMAN Neuronal PAS domain-containing protein 4 OS=Homo sapiens OX=9606 GN=NPAS4 PE=1 SV=1

MYRSTKGASKARRDQINAEIRNLKELLPLAEADKVRLSYLHIMSLACIYTRKGVFFAGGT  
PLAGPTGLLSAQELEDIVAALPGFLLVFTAEGKLLYLSESVSEHLGHSMVDLVAQGDSIY  
DIIDPADHLTVRQQLTLPALDTRDLFRFCRNTSKSLRRQSAGNKLVLIRGRFHAHPPGA  
YWAGNPVFTAFCALEPRPRPGPGPGPASLFLAMFQSRHAKDLALLDISESVLIYLG  
ERSELLCKSWYGLLHPEDLAHASAQHYRLLAESGDIQAEMVVRLQAKTGGWAWIYCLLYS  
EGPEGPITANNYPISDMEAWSLRQQLNSEDQAAYVLGTPTMLPSFPENILSQEECSSTN  
PLFTAALGAPRSTSFPSAPELSVVSASEELPRPSKELDFSYLTFPSGPEPSLQAEISKDL  
VCTPPYTPHQPGGCAFLFSLHEPFQTHLTPSSTLQEQLTPTSTATFSDQLTPSSATFPDP  
LTSPLQGQLTETSRSYEDQLTPCTSTFPDQLLPSTATFPEPLGSPAHEQLTPPSTAFQA  
HLDSPSQTFPEQLSPNPTKTYFAQEGCSFLYEKLPPSPSSPGNGDCTLLALAQLRGPLSV  
DVPLVPEGLLTPEASPVKQSFFHYSEKEQNEIDRLIQQISQLAQGMDRPFSAEAGTGGLE  
PLGGLEPLDSNLSLSGAGPPVLSLDLKPWKCQELDFLADPDNMFLEETPVEDIFMDLSTP  
DPSEEWGSGDPEAEGPGGAPSPCNNLSPEDHSFLEDLATYETAFAFETGVSAFPYDGFTEDEL  
HQLQSQVQDSFHEDGSGGEPTF

### cNLS Mapper Result score cut-off 2.0

#### Predicted NLSs in query sequence

MYRSTKGASKARRDQINAEIRNLKELLPLAEADKVRLSYLHIMSLACIYT 50  
RKGVFFAGGTPLAGPTGLLSAQELEDIVAALPGFLLVFTAEGKLLYLSES 100  
VSEHLGHSMVDLVAQGDSIYDIIDPADHLTVRQQLTLPALDTRDLFRCR 150

```

FNTSKSLRRQSAGNKLVLIRGRFHAHPPGAYWAGNPVFTAFCAPLEPRPR 200
PGPGPGPGPASLFLAMFQSRHAKDLALLDISESVLIYLGFERSELLCKSW 250
YGLLHPEDLAHASAQHYRLLAESGDIQAEMVVRLQAKTGGWAWIYCLLYS 300
EGPEGPITANNYPISDMEAWSLRQQLNSEDQAAYVLGTPTMLPSFPENI 350
LSQEECSSTNPLFTAALGAPRSTSFPSAPELSVVSASEELPRPSKELDFS 400
YLTFPSGPEPSLQAELSKDLVCTPPYTPHQPGCAFLFSLHEPFQTHLPT 450
PSSTLQEQLTPTSTATFSDQLTPSSATFPDPLTSPLQQLTETSVRSYEDQ 500
LTPCTSTFPDQLLPSTATFPPEPLGSPAHEQLTPPSTAFQAHLDSPSQTFP 550
EQLSNPNTKTYFAQEGCSFLYEKLPPSPSSPGNGDCTLLALAQLRGPLSV 600
DVPLVPEGLLTPEASPVKQSFHYSEKEQNEIDRLIQQISQLAQGMDRPF 650
SAEAGTGGLEPLGGLEPLDSNLSLGGAGPPVLSLDLKPWKQELDFLADP 700
DNMFLEETPVEDIFMDLSTPDPSEEWGSGDPEAEGPGGAPSPCNNLSPED 750
HSFLEDLATYETAFAFETGVSAFPYDGFDTDELHQLQSQVQDSFHEDGSGGEP 800
TF 802

```

### Predicted monopartite NLS

| Pos. | Sequence | Score |
|------|----------|-------|
|      |          |       |

### Predicted bipartite NLS

| Pos. | Sequence                           | Score |
|------|------------------------------------|-------|
| 10   | KARRDQINAEIRNLKELLPLAEADKVRLSY     | 2.5   |
| 19   | EIRNLKELLPLAEADKVRLSYLHIMSLACIYT   | 2.3   |
| 158  | RRQSAGNKLVLIRGRFHAHPPGAYWAGNPVFTAF | 2.1   |
| 220  | RHAKDLALLDISESVLIYLGFERSELLCKSW    | 3.2   |
| 283  | RLQAKTGGWAWIYCLLYSEGPEGPITANNYPIS  | 2.3   |
| 593  | QLRGPLSVDVPLVPEGLLTPEASPVKQSF      | 3     |

**NLSStradamus** cut-off 0,1 4HMM static

8 - ASKARRDQI - 16

158 - RRQSAGNKLVLIRGRFHAHPP - 178

193 - APLEPRPRPGPGPGPGPAS - 211

## NucPred

The NucPred score for your sequence is 0.51 (see [score help](#) below)

```

1  MYRSTKGASKARRDQINAEIRNLKELLPLAEADKVRLSYLHIMSLACIYT 50
51 RKGVFVAGGTPLAGPTGLLSAQELEDIVAALPGFLLVFTAEGKLLYLSES 100
101 VSEHLGHSMVDLVAQGDSIYDIIDPADHLTVRQQLTLPALDTDRLEFRCR 150
151 FNTSKSLRRQSAGNKLVLIRGRFHAHPPGAYWAGNPVFTAFCAPLEPRPR 200
201 PGPGPGPGPASLFLAMFQSRHAKDLALLDISESVLIYLGFERSELLCKSW 250
251 YGLLHPEDLAHASAQHYRLLAESGDIQAEMVVRLQAKTGGWAWIYCLLYS 300

```

```

301  EGPEGPITANNYPISDMEAWSLRQQLNSED TQAAYVLGTPTMLPSFPENI 350
351  LSQEECSSTNPLFTAALGAPRSTSFPSAPELSVVSASEELPRPSKELDFS 400
401  YLTFPSGPEPSLQAELSKDLVCTPPYTTPHQPGGCAFLFSLHEPFQTHLPT 450
451  PSSTLQEQLTPSTATFSDQLTPSSATFPDPLTSPLQGGQLTETSVRSYEDQ 500
501  LTPCTSTFPDQLLPSTATFPEPLGSPAHEQLTPPSTAFQAHLDSPSQTFP 550
551  EQLSPNPTKTYFAQEGCSFLYEKLPPSPSSPGNGDCTLLALAQLRGPLSV 600
601  DVPLVPEGLLTPEASPVKQSFFHYSEKEQNEIDRLIQQISQLAQGMDRPF 650
651  SAEAGTGGLEPLGGLEPLDSNLSLSGAGPPVLSLDLKPWKQCQLDFLADP 700
701  DNMFLLEETPVEDIFMDLSTPDPSEEWGSGDPEAEGPGGAPSPCNNLSPED 750
751  HSFLLEDLATYETAFAFETGVSAPFPYDGF TDELHQLQSQVQDSFHEDGSGGEP 800
801  TF 802

```

Positively and negatively influencing subsequences are coloured according to the following scale:

(non-nuclear) negative 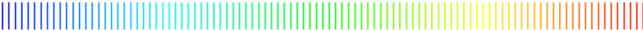 positive (nuclear)

## PSORT II

No NLS positive result

## SeqNLS cut-Off 0,5

No predicted NLS

**Prediction result (The predicted NLS(s) are underlined)**

Npas4: MYRSTKGASKARRDQINAEIRNLKELLPLAEADKVRLSYLHIMSLACIYTRKGVFFAGGT

**Definition of different colors in predictions**

| score range | color                                                                               |
|-------------|-------------------------------------------------------------------------------------|
| 0.1-0.3     |  |
| 0.3-0.5     |  |
| 0.5-0.7     |  |
| 0.7-0.8     |  |
| 0.8-0.86    |  |
| 0.86-0.89   |  |
| >0.89       |  |

**ELM** cut-off 50

No NLS positive result

TRG\_NES\_CRM1\_1      QLRGPLSVDVPLVPE      593-607      7.626e-04

## NESFinder

Position NES Type

=====

20 IRNLKELLPL 2-3-1  
591 LAQLRGPLSV 2-3-1  
665 LEPLDSNLSL 2-3-1

## LocNES

| Protein Name       | Position | Sequence        | Score |
|--------------------|----------|-----------------|-------|
| >LocNES576996605_0 | 19-33    | QINAEIRNLKELLPL | 0.104 |
| >LocNES576996605_0 | 27-41    | LKELLPLAEADKVRL | 0.059 |
| >LocNES576996605_0 | 32-46    | PLAEADKVRLSYLHI | 0.664 |
| >LocNES576996605_0 | 35-49    | EADKVRLSYLHIMSL | 0.198 |
| >LocNES576996605_0 | 71-85    | GLLSAQELEDIVAAL | 0.145 |
| >LocNES576996605_0 | 74-88    | SAQELEDIVAALPGF | 0.112 |
| >LocNES576996605_0 | 76-90    | QELEDIVAALPGFLL | 0.081 |
| >LocNES576996605_0 | 77-91    | ELEDIVAALPGFLLV | 0.060 |
| >LocNES576996605_0 | 78-92    | LEDIVAALPGFLLVF | 0.130 |
| >LocNES576996605_0 | 87-101   | GFLLVFTAEGKLLYL | 0.019 |
| >LocNES576996605_0 | 121-135  | DSIYDIIDPADHLTV | 0.151 |
| >LocNES576996605_0 | 220-234  | MFQSRHAKDLALLDI | 0.531 |
| >LocNES576996605_0 | 226-240  | AKDLALLDISESVLI | 0.118 |
| >LocNES576996605_0 | 230-244  | ALLDISESVLIYLG  | 0.343 |
| >LocNES576996605_0 | 336-350  | QAAYVLGTPTMLPSF | 0.040 |
| >LocNES576996605_0 | 373-387  | APRSTSFPSAPELSV | 0.028 |
| >LocNES576996605_0 | 394-408  | LPRPSKELDFSYLTF | 0.143 |
| >LocNES576996605_0 | 590-604  | CTLLALAQLRGPLSV | 0.124 |
| >LocNES576996605_0 | 594-608  | ALAQLRGPLSVDVPL | 0.030 |
| >LocNES576996605_0 | 632-646  | EQNEIDRLIQQISQL | 0.068 |
| >LocNES576996605_0 | 664-678  | EPLGGLEPLDSNLSL | 0.602 |
| >LocNES576996605_0 | 674-688  | SNLSLSGAGPPVLSL | 0.142 |
| >LocNES576996605_0 | 676-690  | LSLSGAGPPVLSLDL | 0.070 |
| >LocNES576996605_0 | 705-719  | DNMFLEETPVEDIFM | 0.094 |

## NetNES 1.1 Server - prediction results

---

>Sequence - NetNES 1.1 prediction



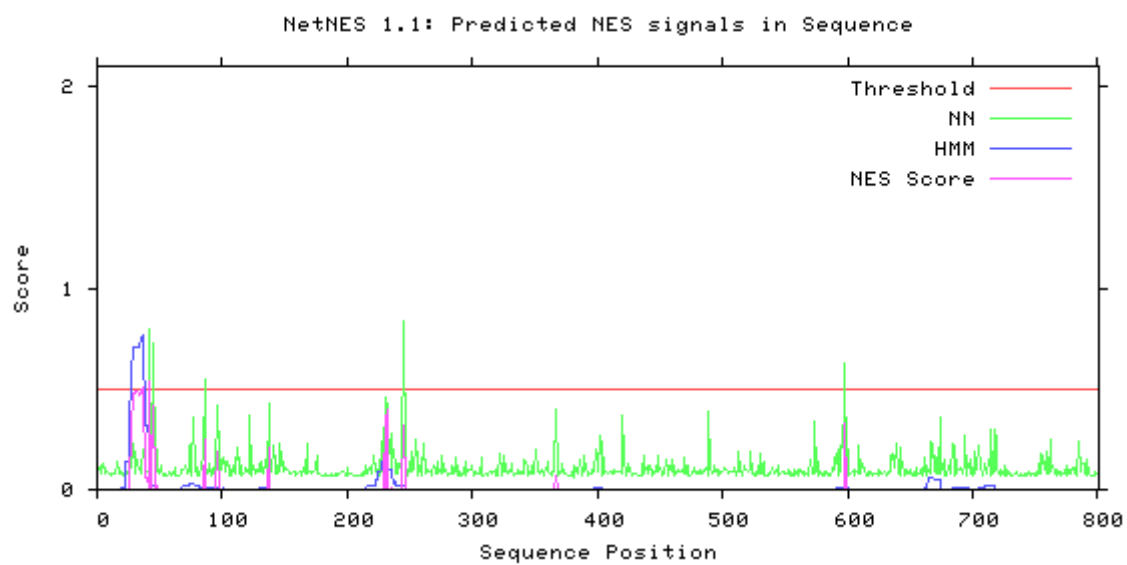

Supplement: s1 [file s1]
