# Supplementary material for: Subcellular Localization Signals of bHLH-PAS Proteins: Their Significance, Current State of Knowledge and Future Perspectives
Source: MDPI journal article supplement (doi:10.3390/ijms20194746), 2019-09-24
Supplement: s1 [file s1]

# Subcellular Localization Signals of bHLH-PAS Proteins: their Significance, Current State of Knowledge and Future Perspectives

Beata Greb-Markiewicz <sup>1,\*</sup> and Marta Kolonko <sup>1</sup>

## Supplementary Materials Summary

### Predictors used for NLS prediction:

|             |   |
|-------------|---|
| cNLS Mapper | a |
| NLStradamus | b |
| NucPred     | c |
| PSORT II    | d |
| SeqNLS      | e |
| ELM         | f |

### Predictors used for NES prediction:

|            |   |
|------------|---|
| ELM        | f |
| NES Finder | g |
| NetNES     | h |
| LocNES     | i |

## Prediction summary for Table 1

### hAhR

#### cNLSMapper

|             |     |
|-------------|-----|
| 11-20 score | 11  |
| 13-41       | 5.4 |
| 34-62       | 4.9 |
| 78-106      | 3.0 |
| 250-280     | 3.1 |
| 368-398     | 3.7 |
| 640-668     | 2.7 |
| 746-776     | 2.9 |

#### NLStradamus

|         |               |
|---------|---------------|
| 12-42   | Posterior 0.3 |
| 247-254 |               |

**NucPred**

13-17 score 0.94

**PSORT II**

13-19 score 0.94

35-41

**SeqNLS**

11-24 score 0.887

27-43 0.886

**ELM****NLS**

13-18 1.276e-03

249-254 7.252e-04

**NES**

538-552 7.626e-04

**NES Finder**

47-56

60-69

63-72

259-268

420-429

539-548

735-744

**NetNES**

64-77

577-584?

**LocNES**

59-73 0.746

258-272 0.138

417-431 0.118

732-746 0.174

**hHIF1 $\alpha$** **cNLS Mapper**

8-36 score 2.6

|         |     |
|---------|-----|
| 68-97   | 2.9 |
| 245-278 | 2.8 |
| 365-394 | 2.7 |
| 716-725 | 8.0 |
| 717-746 | 3.2 |

### **NLStradamus**

3-41    Posterior 0.1  
155-160  
709-723

### **NucPred**

718-721 score 0.94

### **PSORT II**

17-33 score 0.33  
718-721

### **SeqNLS**

|       |       |       |
|-------|-------|-------|
| 10-33 | score | 0.964 |
| 34-39 |       | 0.696 |
| 58-60 |       | 0.568 |

### **ELM**

#### **NLS**

|         |           |
|---------|-----------|
| 717-723 | 7.252e-04 |
|---------|-----------|

#### **NES**

|       |           |
|-------|-----------|
| 82-97 | 7.626e-04 |
|-------|-----------|

### **NES Finder**

37-46  
60-69  
84-93  
559-568

### **NetNES**

L46?  
64-80  
390-399  
559-566?

L583?

L737?

### LocNES

|         |       |
|---------|-------|
| 52-66   | 0.122 |
| 443-457 | 0.284 |
| 558-572 | 0.190 |
| 627-641 | 0.365 |

### hHIF2 $\alpha$

### cNLS Mapper

|         |       |     |
|---------|-------|-----|
| 5-33    | score | 2.5 |
| 20-42   |       | 2.6 |
| 65-94   |       | 3.8 |
| 144-177 |       | 2.9 |
| 682-711 |       | 4.1 |
| 705-735 |       | 5.4 |
| 737-765 |       | 3.2 |
| 793-822 |       | 4.0 |

### NLStradamus

|         |           |     |
|---------|-----------|-----|
| 3-33    | Posterior | 0.1 |
| 156-160 |           |     |
| 680-710 |           |     |
| 738-741 |           |     |

### NucPred

|       |       |      |
|-------|-------|------|
| 14-16 | score | 0.86 |
|-------|-------|------|

### PSORT II

|       |       |      |
|-------|-------|------|
| 14-30 | score | 0.02 |
|-------|-------|------|

### SeqNLS

|       |       |       |
|-------|-------|-------|
| 8-30  | score | 0.916 |
| 34-40 | score | 0.844 |

### ELM

No NLS/NES

### NES Finder

34-43  
92-101  
498-507  
526-535  
699-708  
773-782

### **NetNES**

56-64  
L92?  
498-501?  
L526?

### **LocNES**

|         |       |
|---------|-------|
| 33-47   | 0.135 |
| 49-63   | 0.190 |
| 82-96   | 0.158 |
| 116-130 | 0.105 |
| 497-511 | 0.234 |
| 525-539 | 0.038 |
| 564-578 | 0.124 |
| 698-712 | 0.354 |
| 772-786 | 0.166 |

### **hHIF3 $\alpha$**

### **cNLS Mapper**

|         |       |     |
|---------|-------|-----|
| 20-53   | score | 2.3 |
| 153-182 |       | 2.6 |
| 196-226 |       | 3.3 |
| 361-392 |       | 2.3 |
| 438-465 |       | 3.6 |
| 542-574 |       | 3.7 |
| 567-598 |       | 6.8 |
| 590-620 |       | 3.0 |

### **NLStradamus**

7-30    Posterior 0.1  
512-533  
563-597

**NucPred**

569-571 score 0.90

**PSORT II**

No NLS

**SeqNLS**

24-35 score 0.805

**ELM**

No NLS/NES

**NES Finder**

34-43

57-66

487-496

603-612

630-639

**NetNES**

51-61

122-127

L221?

478-494

**LocNES**

|       |       |
|-------|-------|
| 56-70 | 0.265 |
|-------|-------|

|         |       |
|---------|-------|
| 114-128 | 0.256 |
|---------|-------|

|         |       |
|---------|-------|
| 477-491 | 0.387 |
|---------|-------|

|         |       |
|---------|-------|
| 603-617 | 0.500 |
|---------|-------|

|         |       |
|---------|-------|
| 629-643 | 0.547 |
|---------|-------|

**hSIM1****cNLSMapper**

|            |     |
|------------|-----|
| 4-33 score | 3.0 |
|------------|-----|

|        |     |
|--------|-----|
| 74-104 | 2.3 |
|--------|-----|

|         |     |
|---------|-----|
| 163-197 | 3.4 |
|---------|-----|

|         |     |
|---------|-----|
| 235-267 | 2.8 |
|---------|-----|

|         |     |
|---------|-----|
| 347-377 | 2.7 |
|---------|-----|

|         |     |
|---------|-----|
| 600-628 | 3.6 |
|---------|-----|

703-734            2.6

**NLStradamus**

2-24    Posterior 0.1  
365-386

**PSORT II**

No NLS

**SeqNLS**

No NLS

**ELM**

No NLS/NES

**NES Finder**

20-29  
231-240

**NetNES**

340-347

**LocNES**

|         |       |
|---------|-------|
| 19-33   | 0.254 |
| 42-56   | 0.368 |
| 235-249 | 0.113 |

**hSIM2**

**cNLS Mapper**

|         |       |     |
|---------|-------|-----|
| 6-35    | score | 3.7 |
| 74-105  |       | 3.5 |
| 163-195 |       | 3.5 |
| 235-267 |       | 2.8 |
| 351-378 |       | 6.1 |
| 454-484 |       | 2.6 |
| 556-586 |       | 2.4 |
| 637-665 |       | 2.9 |

**NLStradamus**

2-25    Posterior 0.1

363-386  
556-572

**NucPred**  
No NLS

**PSORT II**  
No NLS

**SeqNLS**  
5-20 score 0.598

**ELM**  
No NLS/NES

**NES Finder**  
8-17  
65-74  
276-285

**NetNES**  
332-344

| <b>LocNES</b> |       |
|---------------|-------|
| 19-33         | 0.228 |
| 35-49         | 0.352 |
| 42-56         | 0.338 |
| 102-116       | 0.130 |
| 190-204       | 0.105 |
| 234-248       | 0.136 |
| 275-289       | 0.083 |
| 325-339       | 0.026 |

**hClock**

| <b>cNLS Mapper</b> |       |     |
|--------------------|-------|-----|
| 39-72              | score | 7.3 |
| 256-290            |       | 3.4 |
| 411-443            |       | 3.5 |
| 451-481            |       | 3.9 |
| 526-553            |       | 3.1 |



**NLStradamus**

27-85    Posterior 0.1

**NucPred**

44-47 score 0.94

**PSORT II**

44-47

82-85

Score 0.03

**SeqNLS**

6-16    score    0.522

44-47            0.862

**ELM**

No NLS

NES

546-561            7.626e-04

**NES Finder**

507-516

548-557

588-597

**NetNES**

115-125

**LocNES**

111-127            0.373

414-428            0.119

547-561            0.122

798-812            0.136

**hNPAS1****cNLS Mapper**

33-61    score    3.1

55-87            2.9

|         |     |
|---------|-----|
| 89-122  | 2.2 |
| 250-284 | 3.0 |
| 458-487 | 2.2 |

### **NLStradamus**

33-76 Posterior 0.1  
96-128  
258-259  
456-475

### **NucPred**

No NLS

### **PSORT II**

No NLS

### **SeqNLS**

|       |       |       |
|-------|-------|-------|
| 41-49 | score | 0.447 |
| 52-60 |       | 0.351 |

### **ELM**

NLS 460-466 7.252e-04  
No NES

### **NES Finder**

65-74  
88-97  
300-309  
304-313  
306-315

### **NetNES**

L97?  
309-318

### **LocNES**

|         |       |
|---------|-------|
| 64-78   | 0.245 |
| 87-101  | 0.295 |
| 273-287 | 0.780 |
| 306-320 | 0.211 |

## hNPAS2

### cNLS Mapper

|         |       |     |
|---------|-------|-----|
| 14-47   | score | 7.3 |
| 214-242 |       | 3.4 |
| 231-265 |       | 3.7 |
| 502-532 |       | 2.2 |
| 698-730 |       | 2.5 |

### NLStradamus

|         |           |     |
|---------|-----------|-----|
| 4-46    | Posterior | 0.1 |
| 803-816 |           |     |
| 821-824 |           |     |

### NucPred

|       |       |      |
|-------|-------|------|
| 19-22 | score | 0.89 |
|-------|-------|------|

### PSORT II

|       |       |       |
|-------|-------|-------|
| 19-22 | score | -0.16 |
|-------|-------|-------|

### SeqNLS

|       |       |       |
|-------|-------|-------|
| 19-22 | score | 0.873 |
|-------|-------|-------|

### ELM

|             |  |           |
|-------------|--|-----------|
| No NLS      |  |           |
| NES 525-539 |  | 7.626e-04 |

### NES Finder

|         |  |
|---------|--|
| 492-501 |  |
| 527-536 |  |

### NetNES

|        |  |
|--------|--|
| 90-102 |  |
|--------|--|

### LocNES

|         |       |
|---------|-------|
| 25-29   | 0.348 |
| 88-102  | 0.398 |
| 526-540 | 0.150 |
| 545-559 | 0.187 |

## hNPAS3

### cNLS Mapper

|             |     |
|-------------|-----|
| 29-58 score | 3.4 |
| 130-161     | 3.0 |
| 266-297     | 2.7 |
| 360-390     | 2.5 |
| 497-527     | 2.0 |
| 578-608     | 3.9 |
| 606-640     | 5.1 |
| 645-674     | 3.2 |
| 727-755     | 3.6 |

### NLStradamus

44-78 Posterior 0.1  
133-136  
273-274  
582-635  
754-773  
596-616 Viterbi Path

### NucPred

599-606 score 0.96

### PSORT II

599-606  
600-618  
Score 3.61

### SeqNLS

1-18 score 0.908

### ELM

NLS  
596-609 score 1.276e-03  
No NES

### NES Finder

71-80  
94-103

285-294  
334-343  
872-881

### **NetNES**

88-98

### **LocNES**

|         |       |
|---------|-------|
| 70-84   | 0.101 |
| 88-102  | 0.507 |
| 284-298 | 0.266 |
| 333-347 | 0.084 |
| 871-885 | 0.079 |
| 903-921 | 0.187 |

### **hNPAS4**

### **cNLS Mapper**

|         |       |     |
|---------|-------|-----|
| 10-39   | score | 2.5 |
| 158-191 |       | 2.1 |
| 220-251 |       | 3.2 |
| 283-314 |       | 2.3 |
| 593-621 |       | 3.0 |

### **NLStradamus**

8-16    Posterior 0.1  
158-178  
193-211

### **NucPred**

No positive result

### **PSORT II**

No specified NLS

### **SeqNLS**

No positive result

### **ELM**

NLS

No positive result

NES

593-607            7.626e-04

**NES Finder**

20-29

591-600

665-674

**NetNES**

26-45

230-245?

L598?

**LocNES**

19-33            0.104

32-46            0.664

220-234        0.531

230-244        0.343

394-408        0.143

590-604        0.124

664-678        0.602

**Prediction summary for Table 2**

**hARNT**

**cNLSMapper**

39-61 score 8.6

99-130        4.6

151-182       2.3

260-291       2.3

310-339       2.6

390-421       3.1

**NLSradamus**

34-47

83-128

**NucPred**

No NLS

**PSORT II**

42-45  
99-102  
Score 0.09

### **SeqNLS**

39-50 score 0.820

### **ELM**

NLS

39-46 Probability 1.276e-03

No NES

### **NES Finder**

336-345

### **NetNES**

159-178

### **LocNES**

|         |       |       |
|---------|-------|-------|
| 159-173 | score | 0.222 |
| 274-288 |       | 0.308 |
| 417-431 |       | 0.198 |
| 671-685 |       | 0.104 |

## **hARNT2**

### **cNLS Mapper**

|         |       |      |
|---------|-------|------|
| 42-66   | score | 10.5 |
| 73-104  |       | 4.0  |
| 256-266 |       | 6.0  |
| 364-394 |       | 3.4  |
| 591-619 |       | 2.1  |

### **NLStradamus**

34-85  
95-102  
258-269

### **NucPred**

73-76      0.89

### **PSORT II**

73-76 score -0.16

### **SeqNLS**

15-29      0.862

39-51      0.883

### **ELM**

#### **NLS**

42-49      1.276e-03

260-265

#### **NES**

No positive result

### **NES Finder**

310-319

702-711

### **NetNES**

133-150

V319?

### **LocNES**

No NES candidate

## **hBMAL1 (ARNT3)**

### **cNLS Mapper**

34-44 score 5.0

83-113      5.4

174-205      3.1

244-277      4.6

291-322      3.0

471-502      3.8

### **NLStradamus**

37-91 posterior 0.1

258-279

472-499



**NucPred**

score 0.87

37-40

82-85

**PSORT II**

37-40

82-85

Score 0.15

**SeqNLS**

23-45 score 0.879

**ELM****NLS**

37-42      Probability 1.276e-03

**NES**

No positive result

**NES Finder**

105-114

108-117

**NetNES**

V114?

142-159

**LocNES**

107-121      0.636

-115-129      0.150

151-165      0.048

**hBMAL2 (ARNT4)****cNLS Mapper**

47-57 score 7.0

114-123      6.0

209-240      3.7

279-314      3.3

|         |     |
|---------|-----|
| 444-474 | 2.2 |
| 554-586 | 2.6 |

### **NLStradamus**

35-60  
103-127  
285-322

### **NucPred**

49-52  
117-120  
Score 0.85

### **PSORT II**

49-55  
117-120  
301-307  
NLS score 1.18

### **SeqNLS**

|       |       |
|-------|-------|
| 1-10  | 0.893 |
| 19-26 | 0.791 |
| 44-59 | 0.895 |

### **ELM**

#### **NLS**

49-55      Probability 1.276e-03

#### **NES**

463-477      Probability 7.626e-04

### **NES Finder**

140-149  
143-152  
239-248

### **NetNES**

140-152?

### **LocNES**

141-156      score 0.614

|         |       |
|---------|-------|
| 238-252 | 0.225 |
| 463-477 | 0.084 |

### Prediction summary for Table 3

#### MET

##### cNLS Mapper

|             |     |
|-------------|-----|
| 38-72 score | 2.9 |
| 98-128      | 3.8 |
| 252-285     | 3.9 |
| 296-330     | 3.5 |
| 489-519     | 3.0 |
| 523-554     | 2.7 |
| 628-662     | 2.6 |

##### NLStradamus

38-52  
68-115  
252-260  
636-640

##### NucPred

98-102 score 0.82

##### PSORT II

98-101 score 0.15

##### SeqNLS

34-43 score 0.548

##### ELM

##### NLS

98-104 Probability 1.276e-03

##### NES

No positive result

##### NES Finder

263-272  
431-440

**NetNES**

130-142

L443?

L603?

**LocNES**

130-144 score 0.658

262-276 0.094

425-439 0.064

446-460 0.044

542-556 0.178

**GCE****Full length isoform****cNLS Mapper**

279-323 score 3.3

424-454 3.0

469-499 3.1

521-554 3.2

625-655 2.7

838-860 12.5

**NLStradamus**

278-294

426-458

647-656

**NucPred**

No predicted NLS

**PSORT II**

840-856 score 0.02

**SeqNLS**

12-25 score 0.399

39-56 0.346

## **ELM**

### **NLS**

|         |                       |
|---------|-----------------------|
| 646-652 | Probability 7.252e-04 |
| 840-859 | Probability 2.588e-04 |
| 852-858 | Probability 1.276e-03 |

### **NES**

No positive result

### **NES Finder**

567-576  
650-659

### **NetNES**

44-50  
L329  
L352-359

### **LocNES**

|         |       |       |
|---------|-------|-------|
| 35-49   | score | 0.073 |
| 347-361 |       | 0.533 |
| 582-596 |       | 0.044 |
| 778-792 |       | 0.016 |

## **SIMA**

### **cNLS Mapper**

|           |       |     |
|-----------|-------|-----|
| 150-180   | score | 2.9 |
| 347-374   |       | 3.1 |
| 383-414   |       | 3.0 |
| 561-591   |       | 3.3 |
| 1102-1131 |       | 2.8 |
| 1212-1232 |       | 6.4 |
| 1288-1316 |       | 3.3 |
| 1409-1417 |       | 3.0 |

### **NLStradamus**

46-91  
545-546

554-581

### **NucPred**

No NLS prediction

### **PSORT II**

63-69

72-88

562-568

1408-1414

NLS score 1.64

### **SeqNLS**

4-32      score    0.902

47-59            0.605

### **ELM**

#### **NLS**

1212-1232      2.588e-04

1408-1413      1.276e-03

#### **NES**

90-105            7.626e-04

173-189

### **NES Finder**

92-101

115-124

121-130

1007-1016

1129-1138

### **NetNES**

L101?

122-124?

L183?

### **LocNES**

91-105    score    0.254

114-128      0.318

120-134      0.139

|           |       |
|-----------|-------|
| 175-189   | 0.398 |
| 477-491   | 0.437 |
| 636-650   | 0.226 |
| 1006-1020 | 0.235 |
| 1125-1139 | 0.130 |

## TANGO

### cNLS Mapper

|             |     |
|-------------|-----|
| 23-54 score | 4.6 |
| 167-196     | 2.2 |
| 207-137     | 2.7 |
| 288-320     | 3.2 |

### NLStradamus ( cutoff 0.1)

11-52  
170

### NucPred

23-26  
Score 0.76

### PSORT II

23-26  
NLS score -0.16

### SeqNLS

No predicted NLS

### ELM

No NLS/NES positive result

### NES Finder

259-268

### NetNES

83-97  
V268?  
I634?

**LocNES**

|         |       |       |
|---------|-------|-------|
| 83-97   | score | 0.352 |
| 258-272 |       | 0.036 |
| 624-638 |       | 0.539 |

**CYCLE****cNLS Mapper**

|         |       |     |
|---------|-------|-----|
| 41-71   | score | 4.8 |
| 176-209 |       | 3.3 |
| 210-240 |       | 4.3 |
| 232-262 |       | 3.4 |

**NLStradamus** (cutoff 0.1)

25-46  
229-246

**NucPred** score 0.90

40-44

**PSORT II**

40-44  
NLS score -0.16

**SeqNLS**

55-60 score 0.659

**ELM****NLS**

|         |           |
|---------|-----------|
| 235-240 | 7.252e-04 |
| 236-241 | 1.276e-03 |

**NES**

No NES positive result

**NES Finder**

50-59  
63-72  
66-75



## NetNES

63-75?

102-111?

L213?

## LocNES

No NES candidates

### Supplementary Material for Figure 3

Sequences of documented NLS/NES motifs within MET, GCE, AHR and NPAS4 proteins

#### MET:

|        |         |
|--------|---------|
| length | 716     |
| HLH    | 38-87   |
| PAS-1  | 137-186 |
| PAS-2  | 403-510 |

NLS: PAS-1 (98-102), PAS-2 (482-498)

NES PAS-1 (126-139), PAS2 (446-456), C-terminus (598-631)

98-RRRKK-102; NLS-1

126-HLTDTLMQLLDCCFL-139; NES-1

446-VRWVIVALRQM-456; NES-2

482-TKFLEVDRGSNKHVSF-498; NLS-2

598-TPALALVPPAPSSVKSITKSISVVNVTAALKR-631; NES-3

#### GCE:

|        |         |
|--------|---------|
| length | 959     |
| HLH    | 279-325 |
| PAS-1  | 352-407 |
| PAS-2  | 539-646 |

NLS: PAS-2 (618-634), C-terminus (840-859)

NES PAS-1 (343-359), PAS-2 (580-610), C-terminus (761-795)

343-QITDTLMQLLDCCFLTL-359; NES-1

580-DDVRWVIVALRQMYDCNSSYGESTYRLFTRN-610; NES-2

618-SKGYLEIDKETNKHVSF-634; NLS-1

840- KRGSTAHVETEEKLSKRRF-859; NLS-2  
762-TPPLALVPPEASSVKSAITKSISVVNVTAALKR-795; NES-3

### AHR:

|        |         |
|--------|---------|
| length | 848     |
| HLH    | 37-78   |
| PAS-1  | 113-226 |
| PAS-2  | 297-382 |

NLS: bHLH (13-39), C-terminus (648-671)

NES: bHLH (55-75), PAS-1 (214-222), C-terminus (around V647)

13-RKRRKPVQKTVKPIPAEGIKSNPSKRH-39; NLS-1 (human)  
63-KLDKLSVLRSL-73; NES-1 (human) 55-75 mouse  
214-FRCRLRCLL-222; NES-2 (mouse)/ 220-FICRLRCLL-228 human  
V647 indispensable for NES activity; NES-3 (human)  
648-VNGMFENWNSNQFVPFNCPPQDPQQ-671; NLS-2 (human)

### NPAS4:

|        |         |       |
|--------|---------|-------|
| length | 802     | mouse |
| HLH    | 1-59    |       |
| PAS-1  | 59-144  |       |
| PAS-2  | 194-340 |       |

NLS: bHLH (10-52), PAS-2 x2 (158-191, 285-316?), C-terminus (593-622?)

NES: bHLH (26-45), PAS-2 (227-242), C-terminus x2 (461-580?, 591-600)

10-KARRDQINAEIRNLKELLPLAEADKVRLSYLHIMSLACIYTRK-52; NLS-1  
26-LLPLAEADKVRLSYLHIMSL-45; NES-1  
158-RRQSAGNKLVLIRGRFHAHPPGAYWAGNPVFTAF-191; NLS-2  
227-LALLDISESVLITYLGF-242; NES-2  
285-RLQAKH GGWTWIYCMYSDGPEGPIITANNYPI-316; NLS-3?  
461-580; NES-3?  
591-LAQLRGPLSV- 600; NES-4  
593-QLRGPLSVDVPLVPEGLLTPEASPVKQSFF-622; NLS-4?
